# Supplementary material for: Unraveling the Catha edulis Extract Effects on the Cellular and Molecular Signaling in SKOV3 Cells
Source: Front Pharmacol. 2021 May 10;12:666885. doi: 10.3389/fphar.2021.666885 (PMC8141790; doi:10.3389/fphar.2021.666885)
Supplement: Supplementary file 4 [file Table9.xlsx]

## Sheet: Sheet1
Canonical Pathways	-log(p-value)	Ratio	Molecules
G-Protein Coupled Receptor Signaling	12.8	0.059	ADORA1,ADRA2A,ADRA2C,AKT2,DRD2,DRD3,FYN,HRH2,HRH3,HTR2A,HTR2B,HTR2C,HTR4,MAP2K1,PRKCE,TAAR1
CREB Signaling in Neurons	12.5	0.0359	ADORA1,ADRA2A,ADRA2C,AKT2,CACNA2D1,DRD2,DRD3,HRH2,HRH3,HRH4,HTR2A,HTR2B,HTR2C,HTR4,KISS1R,MAP2K1,PRKCD,PRKCE,PRKD1,TAAR1,TACR1
Breast Cancer Regulation by Stathmin1	11.6	0.0345	ADORA1,ADRA2A,ADRA2C,DRD2,DRD3,HRH2,HRH3,HRH4,HTR2A,HTR2B,HTR2C,HTR4,KISS1R,MAP2K1,MMP2,PRKCD,PRKCE,PRKD1,TAAR1,TACR1
Serotonin Receptor Signaling	10.7	0.19	HTR2A,HTR2B,HTR2C,HTR4,MAOA,MAOB,SLC18A2,SLC6A4
Gαq Signaling	9.84	0.0719	AKT2,GSK3B,HTR2A,HTR2B,HTR2C,MAP2K1,PRKCD,PRKCE,PRKD1,ROCK1,ROCK2
Xenobiotic Metabolism PXR Signaling Pathway	9.18	0.0625	CES1,CES2,CYP2C19,CYP2C9,CYP3A4,MAOA,MAOB,NOS2,PRKCD,PRKCE,PRKD1
Opioid Signaling Pathway	8.79	0.0492	AKT2,CACNA2D1,FYN,GSK3B,LCK,MAP2K1,NOS1,NOS3,PRKCD,PRKCE,PRKD1,SIGMAR1
Estrogen Receptor Signaling	8.46	0.0405	AKT2,CARM1,GSK3B,JAK1,JAK2,MAP2K1,MMP2,NOS3,PRKCD,PRKCE,PRKD1,ROCK1,ROCK2
Role of NFAT in Cardiac Hypertrophy	8.35	0.0521	AKT2,CACNA2D1,GSK3B,HDAC1,HDAC2,HDAC6,HDAC8,MAP2K1,PRKCD,PRKCE,PRKD1
Xenobiotic Metabolism Signaling	8.31	0.0446	CES1,CES2,CYP2C19,CYP2C9,CYP3A4,MAOA,MAOB,MAP2K1,NOS2,PRKCD,PRKCE,PRKD1
Cardiac Hypertrophy Signaling (Enhanced)	8.12	0.0309	ADRA2A,ADRA2C,AKT2,GSK3B,HDAC1,HDAC2,HDAC6,HDAC8,JAK2,MAP2K1,PRKCD,PRKCE,PRKD1,ROCK1,ROCK2
Endocannabinoid Cancer Inhibition Pathway	7.65	0.0634	AKT2,GSK3B,MAP2K1,MMP2,NOS1,NOS2,NOS3,ROCK1,ROCK2
Systemic Lupus Erythematosus In B Cell Signaling Pathway	7.33	0.0415	AKT2,FYN,GSK3B,JAK1,JAK2,LCK,MAP2K1,PIM2,PRKCD,PRKCE,PRKD1
Dopamine Receptor Signaling	7.17	0.0921	COMT,DRD2,DRD3,MAOA,MAOB,SLC18A2,SLC6A3
IL-3 Signaling	7.05	0.0886	AKT2,JAK1,JAK2,MAP2K1,PRKCD,PRKCE,PRKD1
cAMP-mediated signaling	6.98	0.0444	ADORA1,ADRA2A,ADRA2C,DRD2,DRD3,HRH2,HRH3,HTR4,MAP2K1,TAAR1
Adipogenesis pathway	6.7	0.0606	HDAC1,HDAC2,HDAC6,HDAC8,KAT2B,KDM1A,SIRT1,SIRT2
Superpathway of Melatonin Degradation	6.56	0.105	CYP2A6 (includes others),CYP2C19,CYP2C9,CYP3A4,MAOA,MAOB
Corticotropin Releasing Hormone Signaling	6.48	0.0567	CACNA2D1,MAP2K1,NOS1,NOS2,NOS3,PRKCD,PRKCE,PRKD1
Gap Junction Signaling	6.48	0.0464	AKT2,DRD2,HTR2A,HTR2B,HTR2C,MAP2K1,PRKCD,PRKCE,PRKD1
Phospholipase C Signaling	6.47	0.0392	FYN,HDAC1,HDAC2,HDAC6,HDAC8,LCK,MAP2K1,PRKCD,PRKCE,PRKD1
Calcium-induced T Lymphocyte Apoptosis	6.43	0.1	HDAC1,HDAC2,LCK,PRKCD,PRKCE,PRKD1
PXR/RXR Activation	6.3	0.0952	AKT2,CES2,CYP2A6 (includes others),CYP2C19,CYP2C9,CYP3A4
eNOS Signaling	6.23	0.0526	AKT2,CHRNA3,CHRNA4,CHRNA7,NOS3,PRKCD,PRKCE,PRKD1
Nur77 Signaling in T Lymphocytes	6.22	0.0923	HDAC1,HDAC2,MAP2K1,PRKCD,PRKCE,PRKD1
AMPK Signaling	6.14	0.0423	ADRA2A,ADRA2C,AKT2,CHRNA3,CHRNA4,CHRNA7,KAT2B,NOS3,SIRT1
Citrulline-Nitric Oxide Cycle	6	0.6	NOS1,NOS2,NOS3
Erythropoietin Signaling	5.98	0.0488	AKT2,GSK3B,JAK2,MAP2K1,NOS3,PRKCD,PRKCE,PRKD1
Xenobiotic Metabolism CAR Signaling Pathway	5.84	0.0468	CYP2C19,CYP2C9,CYP3A4,MAP2K1,NOS2,PRKCD,PRKCE,PRKD1
Role of Macrophages, Fibroblasts and Endothelial Cells in Rheumatoid Arthritis	5.82	0.0332	AKT2,GSK3B,JAK2,MAP2K1,NOS2,PRKCD,PRKCE,PRKD1,ROCK1,ROCK2
Huntington's Disease Signaling	5.8	0.0385	AKT2,CAPN1,HDAC1,HDAC2,HDAC6,HDAC8,PRKCD,PRKCE,PRKD1
IL-17 Signaling	5.68	0.075	AKT2,GSK3B,JAK1,JAK2,MAP2K1,NOS2
Prolactin Signaling	5.65	0.0741	FYN,JAK2,MAP2K1,PRKCD,PRKCE,PRKD1
nNOS Signaling in Neurons	5.62	0.109	CAPN1,NOS1,PRKCD,PRKCE,PRKD1
Synaptic Long Term Depression	5.62	0.0437	CACNA2D1,MAP2K1,NOS1,NOS2,NOS3,PRKCD,PRKCE,PRKD1
Production of Nitric Oxide and Reactive Oxygen Species in Macrophages	5.57	0.043	AKT2,JAK1,JAK2,MAP2K1,NOS2,PRKCD,PRKCE,PRKD1
HER-2 Signaling in Breast Cancer	5.56	0.0714	AKT2,GSK3B,MMP2,PRKCD,PRKCE,PRKD1
VEGF Family Ligand-Receptor Interactions	5.56	0.0714	AKT2,MAP2K1,NOS3,PRKCD,PRKCE,PRKD1
RAR Activation	5.47	0.0417	AKT2,CARM1,JAK2,KAT2B,MAP2K1,PRKCD,PRKCE,PRKD1
IL-8 Signaling	5.4	0.0408	AKT2,MAP2K1,MMP2,PRKCD,PRKCE,PRKD1,ROCK1,ROCK2
Calcium Signaling	5.37	0.0404	CACNA2D1,CHRNA3,CHRNA4,CHRNA7,HDAC1,HDAC2,HDAC6,HDAC8
Bupropion Degradation	5.35	0.167	CYP2A6 (includes others),CYP2C19,CYP2C9,CYP3A4
HIF1α Signaling	5.32	0.0398	AKT2,KDM1A,MAP2K1,MMP2,NOS2,PRKCD,PRKCE,PRKD1
Nitric Oxide Signaling in the Cardiovascular System	5.27	0.0638	AKT2,MAP2K1,NOS3,PRKCD,PRKCE,PRKD1
Sperm Motility	5.14	0.0376	FYN,JAK1,JAK2,LCK,MAP2K1,PRKCD,PRKCE,PRKD1
Chronic Myeloid Leukemia Signaling	5.07	0.0588	AKT2,HDAC1,HDAC2,HDAC6,HDAC8,MAP2K1
HOTAIR Regulatory Pathway	5.05	0.0449	AKT2,HDAC1,HDAC2,KDM1A,MMP2,ROCK1,ROCK2
Hepatic Fibrosis Signaling Pathway	5.04	0.0271	AKT2,GSK3B,JAK1,JAK2,MAP2K1,PRKCD,PRKCE,PRKD1,ROCK1,ROCK2
Telomerase Signaling	5.02	0.0577	AKT2,HDAC1,HDAC2,HDAC6,HDAC8,MAP2K1
Dopamine-DARPP32 Feedback in cAMP Signaling	5	0.044	DRD2,DRD3,KCNJ1,NOS1,PRKCD,PRKCE,PRKD1
Thrombopoietin Signaling	4.94	0.0794	JAK2,MAP2K1,PRKCD,PRKCE,PRKD1
Acetone Degradation I (to Methylglyoxal)	4.94	0.133	CYP2A6 (includes others),CYP2C19,CYP2C9,CYP3A4
Noradrenaline and Adrenaline Degradation	4.94	0.133	COMT,MAOA,MAOB,PNMT
CXCR4 Signaling	4.91	0.0427	AKT2,MAP2K1,PRKCD,PRKCE,PRKD1,ROCK1,ROCK2
IL-17A Signaling in Airway Cells	4.9	0.0781	AKT2,GSK3B,JAK1,JAK2,MAP2K1
Pyridoxal 5'-phosphate Salvage Pathway	4.87	0.0769	AKT2,MAP2K1,PRKCD,PRKCE,PRKX
Cell Cycle: G1/S Checkpoint Regulation	4.84	0.0758	GSK3B,HDAC1,HDAC2,HDAC6,HDAC8
Tec Kinase Signaling	4.83	0.0414	FYN,JAK1,JAK2,LCK,PRKCD,PRKCE,PRKD1
Apelin Endothelial Signaling Pathway	4.79	0.0526	AKT2,MAP2K1,NOS3,PRKCD,PRKCE,PRKD1
GP6 Signaling Pathway	4.75	0.0517	AKT2,FYN,GSK3B,PRKCD,PRKCE,PRKD1
Cholecystokinin/Gastrin-mediated Signaling	4.73	0.0513	MAP2K1,PRKCD,PRKCE,PRKD1,ROCK1,ROCK2
Fc Epsilon RI Signaling	4.73	0.0513	AKT2,FYN,MAP2K1,PRKCD,PRKCE,PRKD1
CCR3 Signaling in Eosinophils	4.66	0.05	MAP2K1,PRKCD,PRKCE,PRKD1,ROCK1,ROCK2
Gαi Signaling	4.56	0.048	ADORA1,ADRA2A,ADRA2C,DRD2,DRD3,HRH3
IL-15 Signaling	4.56	0.0667	AKT2,JAK1,JAK2,LCK,MAP2K1
NF-κB Activation by Viruses	4.54	0.0658	AKT2,LCK,PRKCD,PRKCE,PRKD1
14-3-3-mediated Signaling	4.54	0.0476	AKT2,GSK3B,MAP2K1,PRKCD,PRKCE,PRKD1
p70S6K Signaling	4.51	0.0469	AKT2,JAK1,MAP2K1,PRKCD,PRKCE,PRKD1
Estrogen Biosynthesis	4.48	0.103	CYP2A6 (includes others),CYP2C19,CYP2C9,CYP3A4
IL-12 Signaling and Production in Macrophages	4.45	0.0458	AKT2,MAP2K1,NOS2,PRKCD,PRKCE,PRKD1
Cyclins and Cell Cycle Regulation	4.43	0.0625	GSK3B,HDAC1,HDAC2,HDAC6,HDAC8
Semaphorin Neuronal Repulsive Signaling Pathway	4.41	0.0451	AKT2,FYN,GSK3B,MAP2K1,ROCK1,ROCK2
Insulin Receptor Signaling	4.36	0.0441	AKT2,FYN,GSK3B,JAK1,JAK2,MAP2K1
Superpathway of Citrulline Metabolism	4.36	0.2	NOS1,NOS2,NOS3
Thrombin Signaling	4.32	0.0345	AKT2,MAP2K1,PRKCD,PRKCE,PRKD1,ROCK1,ROCK2
Oncostatin M Signaling	4.31	0.093	JAK1,JAK2,MAP2K1,PLAU
LPS/IL-1 Mediated Inhibition of RXR Function	4.21	0.0332	CES2,CYP2A6 (includes others),CYP2C19,CYP2C9,CYP3A4,MAOA,MAOB
Factors Promoting Cardiogenesis in Vertebrates	4.2	0.0414	GSK3B,PRKCD,PRKCE,PRKD1,ROCK1,ROCK2
Systemic Lupus Erythematosus In T Cell Signaling Pathway	4.15	0.0324	AKT2,MAP2K1,NOS1,NOS2,NOS3,ROCK1,ROCK2
ErbB Signaling	4.11	0.0538	GSK3B,MAP2K1,PRKCD,PRKCE,PRKD1
Fcγ Receptor-mediated Phagocytosis in Macrophages and Monocytes	4.11	0.0538	AKT2,FYN,PRKCD,PRKCE,PRKD1
Axonal Guidance Signaling	4.1	0.021	AKT2,FYN,GSK3B,MAP2K1,MMP2,PRKCD,PRKCE,PRKD1,ROCK1,ROCK2
Nicotine Degradation III	4.09	0.0816	CYP2A6 (includes others),CYP2C19,CYP2C9,CYP3A4
α-Adrenergic Signaling	4.09	0.0532	ADRA2A,MAP2K1,PRKCD,PRKCE,PRKD1
Salvage Pathways of Pyrimidine Ribonucleotides	4.05	0.0521	AKT2,MAP2K1,PRKCD,PRKCE,PRKX
Amyloid Processing	4.05	0.08	AKT2,CAPN1,GSK3B,PRKCE
VEGF Signaling	4.03	0.0515	AKT2,MAP2K1,NOS3,ROCK1,ROCK2
UVC-Induced MAPK Signaling	4.02	0.0784	MAP2K1,PRKCD,PRKCE,PRKD1
Apelin Cardiomyocyte Signaling Pathway	4.01	0.051	AKT2,NOS3,PRKCD,PRKCE,PRKD1
p53 Signaling	4.01	0.051	AKT2,GSK3B,HDAC1,KAT2B,SIRT1
Molecular Mechanisms of Cancer	4.01	0.0229	AKT2,FYN,GSK3B,JAK1,JAK2,MAP2K1,PRKCD,PRKCE,PRKD1
Melatonin Degradation I	3.98	0.0769	CYP2A6 (includes others),CYP2C19,CYP2C9,CYP3A4
UVB-Induced MAPK Signaling	3.98	0.0769	MAP2K1,PRKCD,PRKCE,PRKD1
Nicotine Degradation II	3.92	0.0741	CYP2A6 (includes others),CYP2C19,CYP2C9,CYP3A4
Mouse Embryonic Stem Cell Pluripotency	3.92	0.049	AKT2,GSK3B,JAK1,JAK2,MAP2K1
Neuregulin Signaling	3.9	0.0485	AKT2,MAP2K1,PRKCD,PRKCE,PRKD1
PD-1, PD-L1 cancer immunotherapy pathway	3.9	0.0485	AKT2,GSK3B,JAK1,JAK2,LCK
Melatonin Degradation II	3.89	0.5	MAOA,MAOB
Insulin Secretion Signaling Pathway	3.87	0.0293	FYN,JAK1,JAK2,LCK,PRKCD,PRKCE,PRKD1
GNRH Signaling	3.82	0.0353	CACNA2D1,MAP2K1,MMP2,PRKCD,PRKCE,PRKD1
Colorectal Cancer Metastasis Signaling	3.8	0.0285	AKT2,GSK3B,JAK1,JAK2,MAP2K1,MMP2,NOS2
Glioma Signaling	3.79	0.0459	AKT2,MAP2K1,PRKCD,PRKCE,PRKD1
Dopamine Degradation	3.78	0.13	COMT,MAOA,MAOB
Tumor Microenvironment Pathway	3.75	0.0343	AKT2,JAK2,MAP2K1,MMP2,NOS2,PLAU
NGF Signaling	3.72	0.0442	AKT2,MAP2K1,PRKCD,ROCK1,ROCK2
IL-2 Signaling	3.71	0.0656	AKT2,JAK1,LCK,MAP2K1
SPINK1 General Cancer Pathway	3.71	0.0656	AKT2,JAK1,JAK2,MAP2K1
Role of Tissue Factor in Cancer	3.68	0.0435	AKT2,FYN,JAK2,LCK,PLAUR
Endothelin-1 Signaling	3.65	0.0328	NOS1,NOS2,NOS3,PRKCD,PRKCE,PRKD1
PI3K/AKT Signaling	3.65	0.0328	AKT2,GSK3B,JAK1,JAK2,MAP2K1,NOS3
Renin-Angiotensin Signaling	3.64	0.0427	JAK2,MAP2K1,PRKCD,PRKCE,PRKD1
Role of NANOG in Mammalian Embryonic Stem Cell Pluripotency	3.64	0.0427	AKT2,GSK3B,JAK1,JAK2,MAP2K1
IL-15 Production	3.63	0.0424	FYN,JAK1,JAK2,LCK,MAP2K1
HGF Signaling	3.61	0.042	AKT2,MAP2K1,PRKCD,PRKCE,PRKD1
Ephrin Receptor Signaling	3.6	0.0321	AKT2,FYN,JAK2,MAP2K1,ROCK1,ROCK2
Regulation Of The Epithelial Mesenchymal Transition By Growth Factors Pathway	3.59	0.0319	AKT2,GSK3B,JAK1,JAK2,MAP2K1,MMP2
Reelin Signaling in Neurons	3.58	0.0413	AKT2,FYN,GSK3B,LCK,MAP2K1
ErbB4 Signaling	3.58	0.0606	MAP2K1,PRKCD,PRKCE,PRKD1
Leukocyte Extravasation Signaling	3.57	0.0317	MMP2,PRKCD,PRKCE,PRKD1,ROCK1,ROCK2
G Beta Gamma Signaling	3.56	0.041	AKT2,CACNA2D1,PRKCD,PRKCE,PRKD1
Sertoli Cell-Sertoli Cell Junction Signaling	3.56	0.0316	AKT2,GSK3B,MAP2K1,NOS1,NOS2,NOS3
Natural Killer Cell Signaling	3.55	0.0314	AKT2,FYN,JAK2,LCK,MAP2K1,ROCK1
Regulation of the Epithelial-Mesenchymal Transition Pathway	3.55	0.0314	AKT2,GSK3B,JAK1,JAK2,MAP2K1,MMP2
Glucocorticoid Receptor Signaling	3.54	0.0198	AKT2,JAK1,JAK2,KAT2B,MAP2K1,MMP2,NOS2,NOS3,PLAU
P2Y Purigenic Receptor Signaling Pathway	3.5	0.0397	AKT2,MAP2K1,PRKCD,PRKCE,PRKD1
Melatonin Signaling	3.48	0.0571	MAP2K1,PRKCD,PRKCE,PRKD1
Growth Hormone Signaling	3.46	0.0563	JAK2,PRKCD,PRKCE,PRKD1
IL-7 Signaling Pathway	3.41	0.0548	AKT2,FYN,GSK3B,JAK1
Integrin Signaling	3.38	0.0293	AKT2,CAPN1,FYN,GSK3B,MAP2K1,ROCK1
Androgen Signaling	3.36	0.037	CACNA2D1,KAT2B,PRKCD,PRKCE,PRKD1
Inhibition of Angiogenesis by TSP1	3.35	0.0938	AKT2,FYN,NOS3
Protein Kinase A Signaling	3.34	0.0208	GSK3B,MAP2K1,NOS3,PRKCD,PRKCE,PRKD1,ROCK1,ROCK2
Hereditary Breast Cancer Signaling	3.33	0.0365	AKT2,HDAC1,HDAC2,HDAC6,HDAC8
Xenobiotic Metabolism General Signaling Pathway	3.31	0.0362	AKT2,MAP2K1,PRKCD,PRKCE,PRKD1
Type II Diabetes Mellitus Signaling	3.29	0.0357	AKT2,CACNA2D1,PRKCD,PRKCE,PRKD1
JAK/Stat Signaling	3.26	0.05	AKT2,JAK1,JAK2,MAP2K1
Synaptogenesis Signaling Pathway	3.21	0.0228	AKT2,CACNA2D1,FYN,GSK3B,LCK,PRKCD,PRKCE
LPS-stimulated MAPK Signaling	3.2	0.0482	MAP2K1,PRKCD,PRKCE,PRKD1
CTLA4 Signaling in Cytotoxic T Lymphocytes	3.11	0.0455	AKT2,FYN,JAK2,LCK
Cardiac Hypertrophy Signaling	3.07	0.0255	ADRA2A,ADRA2C,GSK3B,MAP2K1,ROCK1,ROCK2
Mechanisms of Viral Exit from Host Cells	3.03	0.0732	PRKCD,PRKCE,PRKD1
CCR5 Signaling in Macrophages	3.03	0.0435	CACNA2D1,PRKCD,PRKCE,PRKD1
iNOS Signaling	2.94	0.0682	JAK1,JAK2,NOS2
Apoptosis Signaling	2.91	0.0404	CAPN1,MAP2K1,PRKCE,ROCK1
Neuropathic Pain Signaling In Dorsal Horn Neurons	2.9	0.04	PRKCD,PRKCE,PRKD1,TACR1
Sumoylation Pathway	2.88	0.0396	HDAC1,HDAC2,KDM1A,SIRT1
Virus Entry via Endocytic Pathways	2.87	0.0392	FYN,PRKCD,PRKCE,PRKD1
FAK Signaling	2.85	0.0388	AKT2,CAPN1,FYN,MAP2K1
Ephrin A Signaling	2.85	0.0638	FYN,ROCK1,ROCK2
NF-κB Signaling	2.84	0.0284	AKT2,GSK3B,HDAC1,HDAC2,LCK
Role of NFAT in Regulation of the Immune Response	2.84	0.0284	AKT2,FYN,GSK3B,LCK,MAP2K1
IGF-1 Signaling	2.83	0.0385	AKT2,JAK1,JAK2,MAP2K1
Gαs Signaling	2.8	0.0377	HRH2,HTR4,MAP2K1,TAAR1
Pancreatic Adenocarcinoma Signaling	2.77	0.037	AKT2,JAK1,JAK2,MAP2K1
GPCR-Mediated Nutrient Sensing in Enteroendocrine Cells	2.73	0.036	CACNA2D1,PRKCD,PRKCE,PRKD1
NRF2-mediated Oxidative Stress Response	2.73	0.0269	GSK3B,MAP2K1,PRKCD,PRKCE,PRKD1
Phenylalanine Degradation IV (Mammalian, via Side Chain)	2.72	0.143	MAOA,MAOB
Adrenomedullin signaling pathway	2.67	0.026	AKT2,GSK3B,MAP2K1,MMP2,NOS3
fMLP Signaling in Neutrophils	2.67	0.0348	MAP2K1,PRKCD,PRKCE,PRKD1
EGF Signaling	2.66	0.0545	AKT2,JAK1,MAP2K1
CD28 Signaling in T Helper Cells	2.66	0.0345	AKT2,FYN,LCK,MAP2K1
CNTF Signaling	2.64	0.0536	JAK1,JAK2,MAP2K1
Semaphorin Signaling in Neurons	2.61	0.0526	FYN,ROCK1,ROCK2
Putrescine Degradation III	2.55	0.118	MAOA,MAOB
Endometrial Cancer Signaling	2.55	0.05	AKT2,GSK3B,MAP2K1
Role of PI3K/AKT Signaling in the Pathogenesis of Influenza	2.53	0.0492	AKT2,GSK3B,MAP2K1
Synaptic Long Term Potentiation	2.53	0.0317	MAP2K1,PRKCD,PRKCE,PRKD1
White Adipose Tissue Browning Pathway	2.51	0.0312	CACNA2D1,SIRT1,THRA,THRB
Gα12/13 Signaling	2.47	0.0305	AKT2,MAP2K1,ROCK1,ROCK2
MSP-RON Signaling In Cancer Cells Pathway	2.45	0.0301	AKT2,GSK3B,MAP2K1,PLAUR
Apelin Muscle Signaling Pathway	2.45	0.105	AKT2,NOS3
Tryptophan Degradation X (Mammalian, via Tryptamine)	2.45	0.105	MAOA,MAOB
Ovarian Cancer Signaling	2.39	0.029	AKT2,GSK3B,MAP2K1,MMP2
GM-CSF Signaling	2.36	0.0429	AKT2,JAK2,MAP2K1
Glioma Invasiveness Signaling	2.34	0.0423	MMP2,PLAU,PLAUR
Xanthine and Xanthosine Salvage	2.33	1	PNP
Leptin Signaling in Obesity	2.31	0.0411	AKT2,JAK2,MAP2K1
Apelin Cardiac Fibroblast Signaling Pathway	2.29	0.087	AKT2,NOS3
Relaxin Signaling	2.29	0.0272	AKT2,MAP2K1,NOS2,NOS3
Macropinocytosis Signaling	2.26	0.0395	PRKCD,PRKCE,PRKD1
IL-22 Signaling	2.25	0.0833	AKT2,JAK1
Role of JAK1, JAK2 and TYK2 in Interferon Signaling	2.25	0.0833	JAK1,JAK2
Thyroid Cancer Signaling	2.24	0.039	AKT2,GSK3B,MAP2K1
VDR/RXR Activation	2.24	0.039	PRKCD,PRKCE,PRKD1
BEX2 Signaling Pathway	2.23	0.0385	AKT2,GSK3B,MMP2
Role of JAK family kinases in IL-6-type Cytokine Signaling	2.22	0.08	JAK1,JAK2
Aldosterone Signaling in Epithelial Cells	2.22	0.026	MAP2K1,PRKCD,PRKCE,PRKD1
Granulocyte Adhesion and Diapedesis	2.18	0.0253	HRH2,HRH3,HRH4,MMP2
IL-4 Signaling	2.17	0.0366	AKT2,JAK1,JAK2
PEDF Signaling	2.17	0.0366	AKT2,ROCK1,ROCK2
Glioblastoma Multiforme Signaling	2.15	0.0247	AKT2,GSK3B,MAP2K1,PRKCD
TR/RXR Activation	2.14	0.0357	AKT2,THRA,THRB
PDGF Signaling	2.11	0.0349	JAK1,JAK2,MAP2K1
Acute Myeloid Leukemia Signaling	2.08	0.0341	AKT2,MAP2K1,PIM2
Prostate Cancer Signaling	2.07	0.0337	AKT2,GSK3B,MAP2K1
G Protein Signaling Mediated by Tubby	2.06	0.0667	JAK2,LCK
Senescence Pathway	2.04	0.0184	AKT2,CAPN1,KAT2B,MAP2K1,SIRT1
Adenine and Adenosine Salvage I	2.03	0.5	PNP
Guanine and Guanosine Salvage I	2.03	0.5	PNP
L-DOPA Degradation	2.03	0.5	COMT
Role of JAK2 in Hormone-like Cytokine Signaling	2.01	0.0625	JAK1,JAK2
PPARα/RXRα Activation	2	0.0223	CYP2C19,CYP2C9,JAK2,MAP2K1
Sirtuin Signaling Pathway	1.97	0.0177	GSK3B,NOS2,NOS3,SIRT1,SIRT2
DNA Methylation and Transcriptional Repression Signaling	1.96	0.0588	HDAC1,HDAC2
Coagulation System	1.93	0.0571	PLAU,PLAUR
Neuroinflammation Signaling Pathway	1.92	0.0172	AKT2,GSK3B,JAK1,JAK2,NOS2
Interferon Signaling	1.91	0.0556	JAK1,JAK2
T Cell Receptor Signaling	1.88	0.0286	FYN,LCK,MAP2K1
Docosahexaenoic Acid (DHA) Signaling	1.86	0.0526	AKT2,GSK3B
Type I Diabetes Mellitus Signaling	1.85	0.028	JAK1,JAK2,NOS2
Retinol Biosynthesis	1.84	0.0513	CES1,CES2
ERK/MAPK Signaling	1.83	0.0199	FYN,MAP2K1,PRKCD,PRKCE
mTOR Signaling	1.82	0.0198	AKT2,PRKCD,PRKCE,PRKD1
Triacylglycerol Degradation	1.82	0.05	CES1,CES2
nNOS Signaling in Skeletal Muscle Cells	1.82	0.05	CACNA2D1,NOS1
Endocannabinoid Developing Neuron Pathway	1.77	0.0261	AKT2,GSK3B,MAP2K1
IL-23 Signaling Pathway	1.74	0.0455	AKT2,JAK2
Arsenate Detoxification I (Glutaredoxin)	1.73	0.25	PNP
Catecholamine Biosynthesis	1.73	0.25	PNMT
Spermine and Spermidine Degradation I	1.73	0.25	PAOX
FAT10 Cancer Signaling Pathway	1.71	0.0435	AKT2,GSK3B
Phagosome Formation	1.7	0.0246	PRKCD,PRKCE,PRKD1
IL-6 Signaling	1.67	0.0238	AKT2,JAK2,MAP2K1
Melanoma Signaling	1.64	0.04	AKT2,MAP2K1
dTMP De Novo Biosynthesis	1.63	0.2	TYMS
PI3K Signaling in B Lymphocytes	1.6	0.0224	AKT2,FYN,MAP2K1
PTEN Signaling	1.58	0.0221	AKT2,GSK3B,MAP2K1
Role of IL-17A in Arthritis	1.57	0.037	MAP2K1,NOS2
Adenine and Adenosine Salvage III	1.56	0.167	PNP
Purine Ribonucleosides Degradation to Ribose-1-phosphate	1.56	0.167	PNP
Serotonin Degradation	1.56	0.0364	MAOA,MAOB
Cancer Drug Resistance By Drug Efflux	1.52	0.0345	AKT2,MAP2K1
MSP-RON Signaling Pathway	1.52	0.0345	JAK2,NOS2
Role of Pattern Recognition Receptors in Recognition of Bacteria and Viruses	1.52	0.0208	PRKCD,PRKCE,PRKD1
PCP pathway	1.49	0.0333	ROCK1,ROCK2
PKCθ Signaling in T Lymphocytes	1.47	0.02	CACNA2D1,FYN,LCK
Mitotic Roles of Polo-Like Kinase	1.45	0.0317	CAPN1,CDC7
ErbB2-ErbB3 Signaling	1.44	0.0312	GSK3B,MAP2K1
HMGB1 Signaling	1.42	0.0191	AKT2,KAT2B,MAP2K1
Role of JAK1 and JAK3 in γc Cytokine Signaling	1.4	0.0299	JAK1,JAK2
TREM1 Signaling	1.37	0.0286	AKT2,JAK2
Small Cell Lung Cancer Signaling	1.36	0.0282	AKT2,NOS1
Ephrin B Signaling	1.35	0.0278	ROCK1,ROCK2
Non-Small Cell Lung Cancer Signaling	1.34	0.0274	AKT2,MAP2K1
Wnt/β-catenin Signaling	1.34	0.0176	AKT2,GSK3B,HDAC1
T Cell Exhaustion Signaling Pathway	1.34	0.0178	AKT2,JAK1,JAK2
Angiopoietin Signaling	1.33	0.027	AKT2,NOS3
Antiproliferative Role of Somatostatin Receptor 2	1.33	0.027	MAP2K1,NOS1
γ-glutamyl Cycle	1.3	0.0909	ANPEP
Chemokine Signaling	1.29	0.026	MAP2K1,ROCK2
Hepatic Cholestasis	1.28	0.0167	PRKCD,PRKCE,PRKD1
Acute Phase Response Signaling	1.28	0.0168	AKT2,JAK2,MAP2K1
Renal Cell Carcinoma Signaling	1.28	0.0256	AKT2,MAP2K1
Role of MAPK Signaling in the Pathogenesis of Influenza	1.28	0.0256	AKT2,MAP2K1
B Cell Receptor Signaling	1.27	0.0166	AKT2,GSK3B,MAP2K1
Actin Nucleation by ARP-WASP Complex	1.27	0.0253	ROCK1,ROCK2
FLT3 Signaling in Hematopoietic Progenitor Cells	1.27	0.0253	AKT2,MAP2K1
Guanosine Nucleotides Degradation III	1.26	0.0833	PNP
ILK Signaling	1.25	0.0162	AKT2,GSK3B,NOS2
Bile Acid Biosynthesis, Neutral Pathway	1.23	0.0769	CYP3A4
Histamine Degradation	1.23	0.0769	AOC1
Urate Biosynthesis/Inosine 5'-phosphate Degradation	1.23	0.0769	PNP
FGF Signaling	1.23	0.0238	AKT2,MAP2K1
RANK Signaling in Osteoclasts	1.2	0.023	AKT2,MAP2K1
Ceramide Signaling	1.19	0.0227	AKT2,MAP2K1
Th17 Activation Pathway	1.19	0.0227	JAK1,JAK2
Regulation of IL-2 Expression in Activated and Anergic T Lymphocytes	1.18	0.0225	FYN,MAP2K1
Death Receptor Signaling	1.17	0.022	PARP2,ROCK1
Adenosine Nucleotides Degradation II	1.17	0.0667	PNP
Glutaryl-CoA Degradation	1.14	0.0625	CA1
Amyotrophic Lateral Sclerosis Signaling	1.13	0.0208	CAPN1,NOS1
Bladder Cancer Signaling	1.13	0.0208	MAP2K1,MMP2
TGF-β Signaling	1.13	0.0208	HDAC1,MAP2K1
EIF2 Signaling	1.11	0.0142	AKT2,GSK3B,MAP2K1
Purine Nucleotides Degradation II (Aerobic)	1.09	0.0556	PNP
Systemic Lupus Erythematosus Signaling	1.08	0.0137	AKT2,LCK,PIM2
DNA damage-induced 14-3-3σ Signaling	1.07	0.0526	AKT2
Actin Cytoskeleton Signaling	1.06	0.0135	MAP2K1,ROCK1,ROCK2
CDK5 Signaling	1.05	0.0187	CAPN1,MAP2K1
Methionine Degradation I (to Homocysteine)	1.05	0.05	PRMT8
iCOS-iCOSL Signaling in T Helper Cells	1.05	0.0189	AKT2,LCK
MSP-RON Signaling In Macrophages Pathway	1.03	0.0182	JAK2,NOS2
Cysteine Biosynthesis III (mammalia)	1.01	0.0455	PRMT8
Pyrimidine Deoxyribonucleotides De Novo Biosynthesis I	1.01	0.0455	TYMS
Tryptophan Degradation III (Eukaryotic)	0.989	0.0435	CA1
Th1 Pathway	0.98	0.0171	JAK1,JAK2
RhoA Signaling	0.956	0.0165	ROCK1,ROCK2
Glutathione-mediated Detoxification	0.955	0.04	ANPEP
Signaling by Rho Family GTPases	0.946	0.012	MAP2K1,ROCK1,ROCK2
Apelin Liver Signaling Pathway	0.939	0.0385	GSK3B
Iron homeostasis signaling pathway	0.9	0.0153	JAK1,JAK2
Human Embryonic Stem Cell Pluripotency	0.894	0.0152	AKT2,GSK3B
Sonic Hedgehog Signaling	0.894	0.0345	GSK3B
Th2 Pathway	0.889	0.015	JAK1,JAK2
STAT3 Pathway	0.878	0.0148	JAK2,MAP2K1
4-1BB Signaling in T Lymphocytes	0.854	0.0312	MAP2K1
IL-9 Signaling	0.842	0.0303	JAK1
IL-17A Signaling in Fibroblasts	0.819	0.0286	GSK3B
Superpathway of Methionine Degradation	0.819	0.0286	PRMT8
Necroptosis Signaling Pathway	0.792	0.0131	CAPN1,JAK1
Antiproliferative Role of TOB in T Cell Signaling	0.786	0.0263	DPP7
Inhibition of Matrix Metalloproteases	0.786	0.0263	MMP2
Role of IL-17F in Allergic Inflammatory Airway Diseases	0.756	0.0244	MAP2K1
Regulation of eIF4 and p70S6K Signaling	0.754	0.0123	AKT2,MAP2K1
BAG2 Signaling Pathway	0.746	0.0238	CHRNA7
Coronavirus Replication Pathway	0.746	0.0238	GSK3B
MIF Regulation of Innate Immunity	0.746	0.0238	NOS2
Mitochondrial Dysfunction	0.741	0.0121	MAOA,MAOB
Th1 and Th2 Activation Pathway	0.733	0.012	JAK1,JAK2
Primary Immunodeficiency Signaling	0.728	0.0227	LCK
PFKFB4 Signaling Pathway	0.711	0.0217	MAP2K1
Dendritic Cell Maturation	0.706	0.0115	AKT2,JAK2
Cell Cycle: G2/M DNA Damage Checkpoint Regulation	0.686	0.0204	KAT2B
RhoGDI Signaling	0.663	0.0108	ROCK1,ROCK2
CD27 Signaling in Lymphocytes	0.663	0.0192	MAP2K1
Lymphotoxin β Receptor Signaling	0.656	0.0189	AKT2
Cell Cycle Control of Chromosomal Replication	0.635	0.0179	CDC7
Retinoic acid Mediated Apoptosis Signaling	0.628	0.0175	PARP2
Heparan Sulfate Biosynthesis (Late Stages)	0.615	0.0169	CES2
Wnt/Ca+ pathway	0.603	0.0164	GSK3B
CD40 Signaling	0.585	0.0156	MAP2K1
Netrin Signaling	0.579	0.0154	CACNA2D1
Role of Osteoblasts, Osteoclasts and Chondrocytes in Rheumatoid Arthritis	0.578	0.00939	AKT2,GSK3B
Heparan Sulfate Biosynthesis	0.573	0.0152	CES2
Osteoarthritis Pathway	0.57	0.00926	NOS2,SIRT1
Basal Cell Carcinoma Signaling	0.551	0.0143	GSK3B
IL-10 Signaling	0.551	0.0143	JAK1
Hypoxia Signaling in the Cardiovascular System	0.541	0.0139	NOS3
Caveolar-mediated Endocytosis Signaling	0.536	0.0137	FYN
Estrogen-Dependent Breast Cancer Signaling	0.536	0.0137	AKT2
Regulation of Cellular Mechanics by Calpain Protease	0.536	0.0137	CAPN1
Role of Wnt/GSK-3β Signaling in the Pathogenesis of Influenza	0.531	0.0135	GSK3B
FcγRIIB Signaling in B Lymphocytes	0.526	0.0133	CACNA2D1
GDNF Family Ligand-Receptor Interactions	0.521	0.0132	MAP2K1
Neurotrophin/TRK Signaling	0.521	0.0132	MAP2K1
BMP signaling pathway	0.49	0.012	MAP2K1
Regulation Of The Epithelial Mesenchymal Transition In Development Pathway	0.49	0.012	GSK3B
GABA Receptor Signaling	0.446	0.0106	CACNA2D1
Melanocyte Development and Pigmentation Signaling	0.446	0.0106	MAP2K1
Regulation of Actin-based Motility by Rho	0.435	0.0103	ROCK1
UVA-Induced MAPK Signaling	0.435	0.0103	PARP2
SAPK/JNK Signaling	0.422	0.0099	LCK
PPAR Signaling	0.418	0.0098	MAP2K1
Antioxidant Action of Vitamin C	0.412	0.00962	JAK2
PAK Signaling	0.408	0.00952	MAP2K1
Neuroprotective Role of THOP1 in Alzheimer's Disease	0.396	0.00917	FAP
Airway Pathology in Chronic Obstructive Pulmonary Disease	0.384	0.00885	MMP2
Sphingosine-1-phosphate Signaling	0.381	0.00877	AKT2
Role of PKR in Interferon Induction and Antiviral Response	0.378	0.0087	JAK1
Rac Signaling	0.364	0.00833	MAP2K1
LXR/RXR Activation	0.362	0.00826	NOS2
Inhibition of ARE-Mediated mRNA Degradation Pathway	0.359	0.0082	AKT2
FXR/RXR Activation	0.351	0.008	AKT2
Cellular Effects of Sildenafil (Viagra)	0.349	0.00794	NOS3
Endocannabinoid Neuronal Synapse Pathway	0.346	0.00787	CACNA2D1
Cdc42 Signaling	0.32	0.00725	GSK3B
Phagosome Maturation	0.313	0.00709	NOS1
Coronavirus Pathogenesis Pathway	0.303	0.00685	JAK1
Epithelial Adherens Junction Signaling	0.295	0.00667	AKT2
Gustation Pathway	0.293	0.00662	CACNA2D1
Germ Cell-Sertoli Cell Junction Signaling	0.265	0.00602	MAP2K1
Tight Junction Signaling	0.263	0.00599	AKT2
Agranulocyte Adhesion and Diapedesis	0.248	0.00568	MMP2
Hepatic Fibrosis / Hepatic Stellate Cell Activation	0.239	0.00549	MMP2
