# Supplementary material for: Unraveling the Catha edulis Extract Effects on the Cellular and Molecular Signaling in SKOV3 Cells
Source: Front Pharmacol. 2021 May 10;12:666885. doi: 10.3389/fphar.2021.666885 (PMC8141790; doi:10.3389/fphar.2021.666885)
Supplement: Supplementary file 6 [file Table6.xlsx]

## Sheet: 98-targets-associated_diseases 
Disease full name	Relevance (p-value)	Number of associated targets	Therapeutic Area	Highest associated targets (max 10)	All targets
Ovarian disease	6e-40	74	Urinary System Disease, Reproductive System Or Breast Disease, Endocrine System Disease	LCK MAP2K1 JAK2 PARP2 JAK1 AKT2 SLC6A4 NISCH DRD2 HDAC1 ...	LCK MAP2K1 JAK2 PARP2 JAK1 AKT2 SLC6A4 NISCH DRD2 HDAC1 KISS1R GSK3B KAT2B HTR2C TACR1 HTR2A DRD3 TYMS HTR4 CDC7 HRH4 HDAC6 NOS2 MMP2 KDM1A MAOA PRKD1 HDAC2 PRKCE NOS1 HDAC8 SLC6A3 THRB NOS3 PRKCD COMT SIRT1 FYN ANPEP PIM2 PLAUR CA9 PLAU SLC7A5 CYP3A4 PBK FAP CES2 CARM1 DPP9 ROCK1 SIRT2 ROCK2 THRA DPP8 SLC18A2 AOC1 LAP3 CA1 PNP SLC6A2 CA6 MAOB PRMT8 CYP2C19 PIM3 CHRNA3 KCNJ1 CA12 HRH2 PAOX NEK1 A…
Ovarian cancer	2e-33	64	Urinary System Disease, Reproductive System Or Breast Disease, Cell Proliferation Disorder, Endocrine System Disease	LCK MAP2K1 JAK2 PARP2 JAK1 AKT2 HDAC1 GSK3B KAT2B KISS1R ...	LCK MAP2K1 JAK2 PARP2 JAK1 AKT2 HDAC1 GSK3B KAT2B KISS1R TACR1 HTR2A HTR2C TYMS HTR4 CDC7 DRD3 HRH4 HDAC6 NOS2 MMP2 KDM1A MAOA PRKCE HDAC2 SLC6A3 HDAC8 PRKCD PRKD1 SIRT1 FYN ANPEP PLAUR CA9 PLAU COMT SLC7A5 CYP3A4 PBK FAP CES2 CARM1 DPP9 PIM2 THRA DPP8 SIRT2 ROCK1 AOC1 ROCK2 LAP3 DRD2 NOS1 NOS3 CA6 PRMT8 PIM3 CA1 THRB CA12 PAOX PNP CYP2C19 CHRNA3
Ovarian neoplasm	1e-32	64	Urinary System Disease, Reproductive System Or Breast Disease, Cell Proliferation Disorder, Endocrine System Disease	LCK MAP2K1 JAK2 PARP2 JAK1 AKT2 HDAC1 GSK3B KAT2B KISS1R ...	LCK MAP2K1 JAK2 PARP2 JAK1 AKT2 HDAC1 GSK3B KAT2B KISS1R TACR1 HTR2C HTR2A TYMS HTR4 DRD3 CDC7 HRH4 HDAC6 NOS2 MMP2 KDM1A MAOA HDAC2 PRKCE HDAC8 SLC6A3 PRKCD PRKD1 SIRT1 DRD2 FYN ANPEP PIM2 PLAUR CA9 PLAU COMT SLC7A5 CYP3A4 PBK FAP CES2 CARM1 DPP9 ROCK1 ROCK2 THRA DPP8 SIRT2 AOC1 LAP3 CA1 NOS3 PNP NOS1 CA6 PRMT8 PIM3 THRB PAOX CA12 CYP2C19 CHRNA3
Ovarian epithelial tumor	8e-31	61	Urinary System Disease, Reproductive System Or Breast Disease, Cell Proliferation Disorder, Endocrine System Disease	LCK JAK2 PARP2 AKT2 JAK1 MAP2K1 HDAC1 GSK3B KAT2B KISS1R ...	LCK JAK2 PARP2 AKT2 JAK1 MAP2K1 HDAC1 GSK3B KAT2B KISS1R TACR1 HTR2A HTR2C HTR4 CDC7 HRH4 DRD3 TYMS HDAC6 NOS2 MMP2 KDM1A MAOA HDAC2 PRKCE HDAC8 SIRT1 PRKCD PRKD1 ANPEP PLAUR CA9 PLAU COMT SLC7A5 CYP3A4 PBK FAP CES2 CARM1 DPP9 PIM2 THRA DPP8 SIRT2 ROCK1 AOC1 ROCK2 LAP3 DRD2 SLC6A3 NOS1 NOS3 CA6 PRMT8 CA1 THRB CA12 PAOX PNP FYN
Ovarian carcinoma	2e-28	63	Urinary System Disease, Reproductive System Or Breast Disease, Cell Proliferation Disorder, Endocrine System Disease	LCK JAK2 PARP2 AKT2 JAK1 MAP2K1 HDAC1 GSK3B KAT2B KISS1R ...	LCK JAK2 PARP2 AKT2 JAK1 MAP2K1 HDAC1 GSK3B KAT2B KISS1R TACR1 HTR2C HTR2A HTR4 CDC7 TYMS DRD3 HRH4 HDAC6 MMP2 NOS2 KDM1A MAOA HDAC2 HDAC8 PRKCE SIRT1 ANPEP PLAUR PLAU CA9 COMT SLC7A5 CYP3A4 PBK FAP CES2 CACNA2D1 CARM1 DPP9 PRKD1 PIM2 THRA DPP8 SIRT2 ROCK1 PRKCD AOC1 LAP3 ROCK2 MAOB DRD2 SLC6A3 NOS1 NOS3 CA6 PRMT8 CA1 THRB CA12 PAOX PNP FYN
Ovarian adenocarcinoma	1e-13	28	Urinary System Disease, Reproductive System Or Breast Disease, Cell Proliferation Disorder, Endocrine System Disease	LCK JAK2 JAK1 AKT2 MAP2K1 HDAC1 GSK3B KAT2B TACR1 HTR2A ...	LCK JAK2 JAK1 AKT2 MAP2K1 HDAC1 GSK3B KAT2B TACR1 HTR2A KISS1R HTR2C HTR4 CDC7 HRH4 DRD3 HDAC6 PARP2 MMP2 KDM1A MAOA NOS2 HDAC8 HDAC2 PRKCE PLAUR CA6 PLAU
Malignant ovarian serous tumor	8e-13	26	Urinary System Disease, Reproductive System Or Breast Disease, Cell Proliferation Disorder, Endocrine System Disease	LCK JAK2 JAK1 AKT2 HDAC1 MAP2K1 GSK3B KAT2B TACR1 HTR2C ...	LCK JAK2 JAK1 AKT2 HDAC1 MAP2K1 GSK3B KAT2B TACR1 HTR2C HTR2A KISS1R HTR4 HRH4 CDC7 DRD3 HDAC6 PARP2 MMP2 KDM1A MAOA NOS2 PRKCE HDAC8 HDAC2 CA6
Ovarian serous adenocarcinoma	8e-13	26	Urinary System Disease, Reproductive System Or Breast Disease, Cell Proliferation Disorder, Endocrine System Disease	LCK JAK2 AKT2 JAK1 HDAC1 MAP2K1 GSK3B KAT2B TACR1 HTR2C ...	LCK JAK2 AKT2 JAK1 HDAC1 MAP2K1 GSK3B KAT2B TACR1 HTR2C HTR2A KISS1R HTR4 CDC7 DRD3 HRH4 HDAC6 PARP2 MMP2 KDM1A MAOA NOS2 PRKCE HDAC8 HDAC2 CA6
Ovarian serous tumor	1e-12	26	Urinary System Disease, Reproductive System Or Breast Disease, Cell Proliferation Disorder, Endocrine System Disease	LCK JAK2 AKT2 JAK1 HDAC1 MAP2K1 GSK3B KAT2B TACR1 HTR2C ...	LCK JAK2 AKT2 JAK1 HDAC1 MAP2K1 GSK3B KAT2B TACR1 HTR2C KISS1R HTR2A HTR4 HRH4 CDC7 DRD3 HDAC6 PARP2 MMP2 KDM1A NOS2 MAOA PRKCE HDAC8 HDAC2 CA6
Primary ovarian insufficiency	2e-10	19	Urinary System Disease, Reproductive System Or Breast Disease, Endocrine System Disease	KISS1R NOS1 PRKD1 THRB NOS3 COMT AKT2 DRD2 SIRT1 TYMS ...	KISS1R NOS1 PRKD1 THRB NOS3 COMT AKT2 DRD2 SIRT1 TYMS MMP2 MAOB NOS2 SIRT2 CYP2C19 CHRNA3 LAP3 NEK1 MAP2K1
Ovarian dysfunction	3e-10	20	Urinary System Disease, Reproductive System Or Breast Disease, Endocrine System Disease	KISS1R NOS1 PRKD1 THRB NOS3 COMT AKT2 DRD2 SIRT1 MMP2 ...	KISS1R NOS1 PRKD1 THRB NOS3 COMT AKT2 DRD2 SIRT1 MMP2 TYMS MAOB CYP2C19 NOS2 SIRT2 MAP2K1 CHRNA3 LAP3 NEK1 MAOA
Ovarian clear cell cancer	4e-10	10	Urinary System Disease, Reproductive System Or Breast Disease, Cell Proliferation Disorder, Endocrine System Disease	HDAC1 HDAC6 HDAC2 HDAC8 PARP2 JAK2 JAK1 AKT2 KISS1R MMP2	HDAC1 HDAC6 HDAC2 HDAC8 PARP2 JAK2 JAK1 AKT2 KISS1R MMP2
Ovarian clear cell tumor	4e-10	10	Urinary System Disease, Reproductive System Or Breast Disease, Cell Proliferation Disorder, Endocrine System Disease	HDAC1 HDAC8 HDAC6 HDAC2 JAK2 PARP2 JAK1 AKT2 KISS1R MMP2	HDAC1 HDAC8 HDAC6 HDAC2 JAK2 PARP2 JAK1 AKT2 KISS1R MMP2
Ovarian clear cell adenocarcinoma	5e-08	8	Urinary System Disease, Reproductive System Or Breast Disease, Cell Proliferation Disorder, Endocrine System Disease	HDAC1 HDAC8 HDAC6 HDAC2 JAK2 JAK1 PARP2 AKT2	HDAC1 HDAC8 HDAC6 HDAC2 JAK2 JAK1 PARP2 AKT2
Ovarian germ cell tumor	9e-07	7	Urinary System Disease, Reproductive System Or Breast Disease, Cell Proliferation Disorder, Endocrine System Disease	MAP2K1 JAK1 PRKCD PRKCE PRKD1 KDM1A CA6	MAP2K1 JAK1 PRKCD PRKCE PRKD1 KDM1A CA6
Malignant ovarian brenner tumor	2e-06	5	Urinary System Disease, Reproductive System Or Breast Disease, Cell Proliferation Disorder, Endocrine System Disease	HDAC1 HDAC6 HDAC2 HDAC8 PARP2	HDAC1 HDAC6 HDAC2 HDAC8 PARP2
High grade ovarian serous adenocarcinoma	2e-06	4	Urinary System Disease, Reproductive System Or Breast Disease, Cell Proliferation Disorder, Endocrine System Disease	PARP2 JAK2 JAK1 AKT2	PARP2 JAK2 JAK1 AKT2
Ovarian mucinous adenocarcinoma	3e-06	7	Urinary System Disease, Reproductive System Or Breast Disease, Cell Proliferation Disorder, Endocrine System Disease	JAK1 JAK2 HDAC1 HDAC6 HDAC2 HDAC8 PARP2	JAK1 JAK2 HDAC1 HDAC6 HDAC2 HDAC8 PARP2
Ovarian cystadenocarcinoma	3e-06	7	Urinary System Disease, Reproductive System Or Breast Disease, Cell Proliferation Disorder, Endocrine System Disease	HDAC6 HDAC2 HDAC1 HDAC8 MMP2 KDM1A PLAUR	HDAC6 HDAC2 HDAC1 HDAC8 MMP2 KDM1A PLAUR
Non-acquired premature ovarian failure	4e-06	12	Urinary System Disease, Reproductive System Or Breast Disease, Endocrine System Disease, Genetic, Familial Or Congenital Disease	KISS1R NOS1 NOS3 THRB COMT AKT2 DRD2 MAOB SIRT2 SIRT1 ...	KISS1R NOS1 NOS3 THRB COMT AKT2 DRD2 MAOB SIRT2 SIRT1 MAP2K1 NEK1
Mucinous ovarian cancer	4e-06	7	Urinary System Disease, Reproductive System Or Breast Disease, Cell Proliferation Disorder, Endocrine System Disease	JAK2 JAK1 HDAC1 HDAC6 HDAC8 HDAC2 PARP2	JAK2 JAK1 HDAC1 HDAC6 HDAC8 HDAC2 PARP2
Ovarian mucinous neoplasm	6e-06	7	Urinary System Disease, Reproductive System Or Breast Disease, Cell Proliferation Disorder, Endocrine System Disease	JAK2 JAK1 HDAC1 HDAC8 HDAC2 HDAC6 PARP2	JAK2 JAK1 HDAC1 HDAC8 HDAC2 HDAC6 PARP2
Ovarian mucinous cystadenocarcinoma	6e-06	4	Urinary System Disease, Reproductive System Or Breast Disease, Cell Proliferation Disorder, Endocrine System Disease	HDAC1 HDAC2 HDAC8 HDAC6	HDAC1 HDAC2 HDAC8 HDAC6
Ovarian serous cystadenocarcinoma	2e-05	6	Urinary System Disease, Reproductive System Or Breast Disease, Cell Proliferation Disorder, Endocrine System Disease	HDAC8 HDAC1 HDAC6 HDAC2 MMP2 KDM1A	HDAC8 HDAC1 HDAC6 HDAC2 MMP2 KDM1A
Ovarian clear cell cystadenocarcinoma	4e-05	4	Urinary System Disease, Reproductive System Or Breast Disease, Cell Proliferation Disorder, Endocrine System Disease	HDAC6 HDAC1 HDAC8 HDAC2	HDAC6 HDAC1 HDAC8 HDAC2
Ovarian cyst	0.0001	4	Phenotype	NOS1 AKT2 CHRNA3 CYP2C9	NOS1 AKT2 CHRNA3 CYP2C9
Ovarian endometrial cancer	0.001	7	Urinary System Disease, Reproductive System Or Breast Disease, Cell Proliferation Disorder, Endocrine System Disease	MAP2K1 LCK JAK1 AKT2 JAK2 PARP2 CA6	MAP2K1 LCK JAK1 AKT2 JAK2 PARP2 CA6
Premature ovarian insufficiency	0.001	4	Phenotype	CDC7 COMT SIRT1 JAK2	CDC7 COMT SIRT1 JAK2
Ovarian serous carcinoma	0.002	4	Urinary System Disease, Reproductive System Or Breast Disease, Cell Proliferation Disorder, Endocrine System Disease	NOS2 HDAC2 AKT2 GSK3B	NOS2 HDAC2 AKT2 GSK3B
Ovarian teratoma	0.002	3	Urinary System Disease, Reproductive System Or Breast Disease, Cell Proliferation Disorder, Endocrine System Disease	MAP2K1 JAK1 KDM1A	MAP2K1 JAK1 KDM1A
Hereditary breast and ovarian cancer syndrome	0.003	3	Urinary System Disease, Reproductive System Or Breast Disease, Integumentary System Disease, Cell Proliferation Disorder, Endocrine System Disease, Respiratory Or Thoracic Disease, Genetic, Familial Or Congenital Disease	PARP2 AKT2 SIRT1	PARP2 AKT2 SIRT1
Familial ovarian carcinoma	0.003	3	Urinary System Disease, Reproductive System Or Breast Disease, Cell Proliferation Disorder, Endocrine System Disease, Genetic, Familial Or Congenital Disease	PARP2 AKT2 SIRT1	PARP2 AKT2 SIRT1
Ovarian hyperstimulation syndrome	0.004	3	Urinary System Disease, Reproductive System Or Breast Disease, Endocrine System Disease, Genetic, Familial Or Congenital Disease	DRD2 DRD3 KISS1R	DRD2 DRD3 KISS1R
Ovarian endometrioid adenocarcinoma	0.005	6	Urinary System Disease, Reproductive System Or Breast Disease, Cell Proliferation Disorder, Endocrine System Disease	LCK JAK1 MAP2K1 AKT2 JAK2 CA6	LCK JAK1 MAP2K1 AKT2 JAK2 CA6
Familial ovarian cancer	0.005	3	Urinary System Disease, Reproductive System Or Breast Disease, Cell Proliferation Disorder, Endocrine System Disease, Genetic, Familial Or Congenital Disease	PARP2 AKT2 SIRT1	PARP2 AKT2 SIRT1
Ovarian small cell carcinoma	0.006	2	Urinary System Disease, Reproductive System Or Breast Disease, Cell Proliferation Disorder, Endocrine System Disease	CARM1 MAP2K1	CARM1 MAP2K1
Ovarian neuroendocrine neoplasm	0.006	2	Urinary System Disease, Reproductive System Or Breast Disease, Cell Proliferation Disorder, Endocrine System Disease	CARM1 MAP2K1	CARM1 MAP2K1
Rare female infertility due to an anomaly of ovarian function of genetic origin	0.007	4	Urinary System Disease, Reproductive System Or Breast Disease, Endocrine System Disease, Genetic, Familial Or Congenital Disease	KISS1R NOS3 COMT AKT2	KISS1R NOS3 COMT AKT2
Female infertility due to an anomaly of ovarian function	0.007	4	Urinary System Disease, Reproductive System Or Breast Disease	KISS1R NOS3 COMT AKT2	KISS1R NOS3 COMT AKT2
Ovarian benign neoplasm	0.01	4	Urinary System Disease, Reproductive System Or Breast Disease, Cell Proliferation Disorder, Endocrine System Disease	AKT2 MMP2 NOS2 SLC7A5	AKT2 MMP2 NOS2 SLC7A5
Ovarian carcinosarcoma	0.01	2	Urinary System Disease, Reproductive System Or Breast Disease, Cell Proliferation Disorder, Endocrine System Disease	JAK1 PARP2	JAK1 PARP2
Ovarian Endometrioid Adenocarcinoma with Squamous Differentiation	0.02	5	Urinary System Disease, Reproductive System Or Breast Disease, Cell Proliferation Disorder, Endocrine System Disease	MAP2K1 LCK JAK1 JAK2 AKT2	MAP2K1 LCK JAK1 JAK2 AKT2
Undifferentiated ovarian carcinoma	0.03	1	Urinary System Disease, Reproductive System Or Breast Disease, Cell Proliferation Disorder, Endocrine System Disease	MMP2	MMP2
