# Supplementary material for: Unraveling the Catha edulis Extract Effects on the Cellular and Molecular Signaling in SKOV3 Cells
Source: Front Pharmacol. 2021 May 10;12:666885. doi: 10.3389/fphar.2021.666885 (PMC8141790; doi:10.3389/fphar.2021.666885)
Supplement: Supplementary file 9 [file Table4.xlsx]

## Sheet: 88-targets-associated_diseases
Disease full name	Relevance (p-value)	Number of associated targets	Therapeutic Area	Highest associated targets (max 10)	All targets
Substance dependence	2e-57	74	Psychiatric Disorder	SLC6A3 DRD2 CHRNA4 OPRM1 SLC6A4 DRD3 GRIN2B OPRK1 HTR2A ADRB2 ...	SLC6A3 DRD2 CHRNA4 OPRM1 SLC6A4 DRD3 GRIN2B OPRK1 HTR2A ADRB2 OPRD1 SLC6A2 HTR3A ADRA2A HTR1A HTR2C ADRA1B ADRB1 ADORA2A ADRA2C ADRA1A HTR4 ADRA2B CACNA2D1 ADORA2B CNR1 MAOB SIGMAR1 SLC18A2 TACR1 MAOA OPRL1 CYP2A6 CYP3A4 SLC22A6 HTR1D CYP2C19 CYP2D6 CXCL8 CYP2C9 TAAR1 CNR2 NOS2 CHRNA7 TRPV3 ODC1 NOS1 MTAP HTR2B PLAU ANPEP CHEK1 AOC3 S1PR1 SLC7A5 CES1 PNMT DPP4 HSD17B3 NUDT1 KDM1A UGT2B7 FYN ART1 …
Cocaine dependence	1e-56	35	Psychiatric Disorder, Nervous System Disease	DRD2 HTR2A OPRM1 HTR2C OPRK1 GRIN2B ADORA2A ADORA2B OPRD1 SLC6A3 ...	DRD2 HTR2A OPRM1 HTR2C OPRK1 GRIN2B ADORA2A ADORA2B OPRD1 SLC6A3 DRD3 SLC6A2 SLC6A4 MAOB SLC18A2 ADRB2 ADRB1 ADRA1B ADRA1A HTR1A ADRA2B ADRA2C ADRA2A CHRNA4 HTR3A CNR1 TACR1 SIGMAR1 HTR1D OPRL1 TAAR1 CNR2 MAOA NOS1 CES2
Substance-related disorder	3e-56	74	Psychiatric Disorder	SLC6A3 DRD2 CHRNA4 OPRM1 SLC6A4 DRD3 GRIN2B OPRK1 HTR2A ADRB2 ...	SLC6A3 DRD2 CHRNA4 OPRM1 SLC6A4 DRD3 GRIN2B OPRK1 HTR2A ADRB2 OPRD1 SLC6A2 HTR3A ADRA2A HTR1A HTR2C ADRA1B ADRB1 ADORA2A ADRA2C ADRA1A HTR4 ADRA2B CACNA2D1 ADORA2B CNR1 MAOB SIGMAR1 SLC18A2 TACR1 MAOA OPRL1 CYP2A6 CYP3A4 SLC22A6 HTR1D CXCL8 CYP2C19 CYP2D6 CYP2C9 CNR2 TAAR1 NOS2 CHRNA7 TRPV3 ODC1 NOS1 MTAP HTR2B PLAU ANPEP CHEK1 S1PR1 AOC3 CES1 SLC7A5 PNMT DPP4 HSD17B3 NUDT1 KDM1A UGT2B7 FYN ART1 …
Drug-induced mental disorder	6e-53	64	Psychiatric Disorder, Nervous System Disease	SLC6A3 DRD2 CHRNA4 OPRM1 SLC6A4 DRD3 OPRK1 GRIN2B HTR2A ADRB2 ...	SLC6A3 DRD2 CHRNA4 OPRM1 SLC6A4 DRD3 OPRK1 GRIN2B HTR2A ADRB2 OPRD1 HTR3A ADRA2A SLC6A2 HTR1A HTR2C ADRA1B ADRA2C ADRB1 HTR4 ADORA2A ADRA2B ADRA1A CACNA2D1 ADORA2B CNR1 MAOB SIGMAR1 SLC18A2 TACR1 MAOA OPRL1 CYP2A6 CYP3A4 HTR1D SLC22A6 CYP2C19 CYP2D6 CXCL8 CYP2C9 TAAR1 NOS2 CNR2 CHRNA7 NOS1 HTR2B AOC3 CES1 NUDT1 DPP4 CHEK1 KDM1A ART1 ANPEP S1PR5 UGT2B7 PLAU CES2 GSR S1PR3 HSD17B3 NMUR2 MTAP SLC7A5
Drug dependence	6e-53	64	Psychiatric Disorder, Nervous System Disease	SLC6A3 DRD2 CHRNA4 OPRM1 SLC6A4 DRD3 OPRK1 GRIN2B HTR2A ADRB2 ...	SLC6A3 DRD2 CHRNA4 OPRM1 SLC6A4 DRD3 OPRK1 GRIN2B HTR2A ADRB2 OPRD1 HTR3A ADRA2A SLC6A2 HTR1A HTR2C ADRA1B ADRA2C ADRB1 HTR4 ADORA2A ADRA2B ADRA1A ADORA2B CACNA2D1 CNR1 MAOB SIGMAR1 SLC18A2 TACR1 MAOA OPRL1 CYP2A6 CYP3A4 HTR1D SLC22A6 CYP2C19 CYP2D6 CXCL8 CYP2C9 TAAR1 NOS2 CNR2 CHRNA7 NOS1 HTR2B AOC3 CES1 NUDT1 DPP4 CHEK1 KDM1A ART1 ANPEP S1PR5 UGT2B7 PLAU GSR CES2 NMUR2 S1PR3 HSD17B3 MTAP SLC7A5
Substance abuse	8e-52	31	Psychiatric Disorder	DRD2 OPRM1 HTR2C SLC6A3 SLC6A2 HTR2A OPRK1 HTR1A SLC6A4 OPRD1 ...	DRD2 OPRM1 HTR2C SLC6A3 SLC6A2 HTR2A OPRK1 HTR1A SLC6A4 OPRD1 GRIN2B CHRNA4 HTR3A ADRA2B ADRA2A ADRA2C DRD3 ADRA1A ADRA1B CNR2 CYP2C19 CYP2D6 MAOA CNR1 MAOB SLC18A2 TACR1 HTR2B CYP3A4 SIGMAR1 OPRL1
Alcohol-related disorders	2e-51	50	Psychiatric Disorder	DRD2 SLC6A4 OPRM1 GRIN2B OPRK1 HTR2A OPRD1 ADRA2A CHRNA4 HTR1A ...	DRD2 SLC6A4 OPRM1 GRIN2B OPRK1 HTR2A OPRD1 ADRA2A CHRNA4 HTR1A HTR2C ADRA1B ADRA2B ADRB1 ADRA2C ADRA1A ADORA2A ADRB2 CACNA2D1 ADORA2B HTR3A SLC6A2 DRD3 SLC6A3 TACR1 OPRL1 CNR1 SLC22A6 CXCL8 MAOA CNR2 MAOB SLC18A2 SIGMAR1 NOS2 CYP2A6 CYP3A4 S1PR1 CYP2C19 CYP2D6 TAAR1 HTR1D NOS1 AOC3 DPP4 CES1 CYP2C9 UGT2B7 NMUR2 PLAU
Substance withdrawal syndrome	6e-50	34	Psychiatric Disorder, Nervous System Disease	OPRM1 GRIN2B OPRK1 ADRA2B ADRA2C ADRA2A CACNA2D1 OPRD1 DRD2 HTR2A ...	OPRM1 GRIN2B OPRK1 ADRA2B ADRA2C ADRA2A CACNA2D1 OPRD1 DRD2 HTR2A DRD3 CNR1 CYP2C19 HTR1A CXCL8 HTR2C ADRB2 SLC6A4 CYP2C9 SLC18A2 MAOA OPRL1 SLC6A3 MAOB CYP2D6 NOS1 HTR3A TACR1 CNR2 CES1 CYP3A4 SLC6A2 ADRB1 NOS2
Anxiety disorder	1e-49	57	Psychiatric Disorder, Nervous System Disease	CNR1 SLC6A3 DRD2 HTR1A SLC6A4 SLC6A2 HTR2A HTR3A GRIN2B OPRM1 ...	CNR1 SLC6A3 DRD2 HTR1A SLC6A4 SLC6A2 HTR2A HTR3A GRIN2B OPRM1 HTR2C ADRB2 DRD3 ADRA2A ADRB1 ADRA2C OPRD1 ADRA2B OPRK1 ADRA1A ADRA1B CACNA2D1 TACR1 NOS1 MAOA HTR1D HTR4 HTR2B MAOB CXCL8 CHRNA7 ADORA2A DPP4 CYP2D6 CYP2C19 SLC18A2 CNR2 NOS2 CHRNA4 OPRL1 CYP3A4 HRH4 CYP2C9 SIGMAR1 KDM1A NMUR2 TAAR1 KISS1R S1PR3 ANPEP RPS6KA3 GSR CYP2A6 SLC7A5 CHEK1 FYN MTAP
Major depressive disorder	2e-49	34	Psychiatric Disorder, Nervous System Disease	MAOA HTR2C HTR1A ADRA2C ADRA2A CHRNA4 ADRA2B TACR1 MAOB OPRD1 ...	MAOA HTR2C HTR1A ADRA2C ADRA2A CHRNA4 ADRA2B TACR1 MAOB OPRD1 SLC6A3 SLC6A2 DRD3 SLC18A2 HTR3A HTR2A OPRK1 SLC6A4 DRD2 OPRM1 GRIN2B HTR1D ADRB2 ADRB1 ADORA2A ADORA2B SIGMAR1 OPRL1 ADRA1A HTR4 HTR2B NOS2 CYP2C9 MTAP
Nicotine dependence	1e-48	58	Psychiatric Disorder, Nervous System Disease, Genetic, Familial Or Congenital Disease	SLC6A3 CHRNA4 OPRM1 ADRB2 SLC6A2 OPRK1 ADRB1 OPRD1 SLC6A4 ADRA1B ...	SLC6A3 CHRNA4 OPRM1 ADRB2 SLC6A2 OPRK1 ADRB1 OPRD1 SLC6A4 ADRA1B ADRA1A MAOB CNR1 ADRA2A ADRA2C ADRA2B GRIN2B HTR2C CACNA2D1 MAOA HTR3A DRD3 DRD2 HTR2A CYP2A6 CYP2C19 CYP2D6 CXCL8 CYP2C9 NOS2 CHRNA7 CYP3A4 SLC18A2 OPRL1 NOS1 AOC3 TACR1 CES1 TAAR1 HTR1A NUDT1 CNR2 CHEK1 KDM1A DPP4 ART1 HTR4 ANPEP ADORA2A S1PR5 UGT2B7 PLAU SLC22A6 GSR S1PR3 HSD17B3 MTAP SLC7A5
Alcohol dependence	1e-48	43	Psychiatric Disorder, Nervous System Disease	DRD2 SLC6A4 OPRM1 GRIN2B OPRK1 HTR2A OPRD1 ADRA2A CHRNA4 HTR1A ...	DRD2 SLC6A4 OPRM1 GRIN2B OPRK1 HTR2A OPRD1 ADRA2A CHRNA4 HTR1A ADRA1B ADRA2B ADRA1A ADRA2C CACNA2D1 HTR3A HTR2C SLC6A2 DRD3 TACR1 SLC6A3 OPRL1 CNR1 ADORA2A ADORA2B SLC22A6 MAOA MAOB CNR2 SLC18A2 SIGMAR1 NOS2 CYP3A4 CYP2D6 TAAR1 CYP2A6 HTR1D NOS1 CYP2C19 CXCL8 DPP4 CYP2C9 NMUR2
Alcohol-induced mental disorder	1e-48	43	Psychiatric Disorder, Nervous System Disease	DRD2 SLC6A4 OPRM1 GRIN2B OPRK1 HTR2A OPRD1 ADRA2A CHRNA4 HTR1A ...	DRD2 SLC6A4 OPRM1 GRIN2B OPRK1 HTR2A OPRD1 ADRA2A CHRNA4 HTR1A ADRA1B ADRA2B ADRA2C ADRA1A CACNA2D1 HTR3A HTR2C SLC6A2 DRD3 TACR1 SLC6A3 OPRL1 CNR1 ADORA2A ADORA2B SLC22A6 MAOA MAOB CNR2 SLC18A2 SIGMAR1 NOS2 CYP3A4 CYP2D6 TAAR1 CYP2A6 HTR1D NOS1 CYP2C19 CXCL8 DPP4 CYP2C9 NMUR2
Cognitive disorder	3e-48	79	Psychiatric Disorder, Nervous System Disease	DRD2 DPP4 DRD3 GRIN2B HTR2C HTR3A SLC18A2 SLC6A3 CHRNA7 SLC6A4 ...	DRD2 DPP4 DRD3 GRIN2B HTR2C HTR3A SLC18A2 SLC6A3 CHRNA7 SLC6A4 ADRA2B ADRA1A HTR1A FYN MAOB ADRA2A OPRM1 ADRA1B HTR2A CHRNA4 SIGMAR1 SLC6A2 HTR1D HTR4 ADRB1 ADRB2 HTR2B ADRA2C CACNA2D1 MAOA NOS1 NMUR2 CYP2D6 CYP2C19 CNR1 NOS2 PNP PLAU CES1 ILK KDM1A TACR1 ADORA2A OPRD1 S1PR1 S1PR5 TAAR1 S1PR4 ART1 S1PR3 PNMT TRPV3 KISS1R UGT2B7 ADORA2B OPRK1 CXCL8 NUDT1 LCK CYP2C9 SLC7A5 CNR2 OPRL1 ODC1 CYP3A4 AO…
Dementia (disease)	1e-47	73	Psychiatric Disorder, Nervous System Disease	DRD2 SLC18A2 GRIN2B CHRNA7 SLC6A3 ADRA1A SLC6A4 ADRA1B HTR2C SLC6A2 ...	DRD2 SLC18A2 GRIN2B CHRNA7 SLC6A3 ADRA1A SLC6A4 ADRA1B HTR2C SLC6A2 HTR2A ADRB1 HTR1A ADRB2 CHRNA4 SIGMAR1 CACNA2D1 DRD3 ADRA2B MAOB ADRA2A ADRA2C HTR3A NOS2 PNP PLAU CNR1 CES1 KDM1A FYN ILK NOS1 ADORA2A PNMT KISS1R TRPV3 ADORA2B CXCL8 HTR4 MAOA LCK CYP2D6 ODC1 CNR2 CYP3A4 DPP4 AOC3 CHEK1 TACR1 OPRK1 OPRM1 NUDT1 SLC7A5 OPRL1 OPRD1 S1PR1 ANPEP CYP2C19 S1PR5 KIF11 KCNA5 DPP7 CDC7 CYP2A6 CYP2C9 CDK9…
Depressive disorder	2e-47	59	Psychiatric Disorder, Nervous System Disease	DRD2 ADRA1B MAOA HTR1A SLC6A3 SLC6A2 SLC6A4 HTR2A GRIN2B OPRM1 ...	DRD2 ADRA1B MAOA HTR1A SLC6A3 SLC6A2 SLC6A4 HTR2A GRIN2B OPRM1 HTR3A HTR4 SLC18A2 TACR1 HTR2C DRD3 MAOB HTR1D ADRB1 CHRNA4 ADRA2A ADRA2C ADRB2 HTR2B OPRK1 ADRA1A OPRD1 ADRA2B CACNA2D1 CYP2C19 CYP2D6 ADORA2A SIGMAR1 ADORA2B OPRL1 CHRNA7 CYP2C9 NUDT1 DPP4 CNR1 CXCL8 CNR2 NOS1 NOS2 CYP3A4 KDM1A CDK9 UGT2B7 PLAU ODC1 TAAR1 HRH4 PNMT AOC3 SLC22A6 ANPEP GSR CYP2A6 MTAP
Unipolar depression	2e-47	58	Psychiatric Disorder, Nervous System Disease	DRD2 ADRA1B MAOA HTR1A SLC6A3 SLC6A2 SLC6A4 HTR2A GRIN2B OPRM1 ...	DRD2 ADRA1B MAOA HTR1A SLC6A3 SLC6A2 SLC6A4 HTR2A GRIN2B OPRM1 HTR3A HTR4 SLC18A2 HTR2C DRD3 MAOB HTR1D ADRB1 CHRNA4 ADRA2A ADRA2C ADRB2 HTR2B OPRK1 ADRA1A OPRD1 ADRA2B CACNA2D1 CYP2C19 CYP2D6 ADORA2A ADORA2B CHRNA7 CYP2C9 NUDT1 OPRL1 DPP4 CNR1 CXCL8 CNR2 NOS1 NOS2 CYP3A4 TACR1 SIGMAR1 KDM1A CDK9 UGT2B7 PLAU ODC1 TAAR1 HRH4 PNMT AOC3 SLC22A6 ANPEP CYP2A6 GSR
Neurotic disorder	3e-46	39	Psychiatric Disorder, Nervous System Disease	DRD2 CNR1 HTR1A SLC6A4 ADRB2 DRD3 OPRM1 GRIN2B SLC6A2 HTR2C ...	DRD2 CNR1 HTR1A SLC6A4 ADRB2 DRD3 OPRM1 GRIN2B SLC6A2 HTR2C HTR2A ADRA2B HTR3A ADRB1 ADRA1A ADRA2A ADRA2C ADRA1B OPRD1 OPRK1 CACNA2D1 TACR1 SLC6A3 MAOA MAOB CXCL8 NOS1 SLC18A2 OPRL1 DPP4 CYP2C9 CYP2D6 CYP2C19 CHRNA4 SIGMAR1 NOS2 CHRNA7 CYP2A6 CNR2
Opioid dependence	7e-46	32	Psychiatric Disorder, Nervous System Disease	OPRM1 DRD2 OPRD1 OPRK1 GRIN2B HTR3A ADRA2C HTR1A ADRA2A ADRA2B ...	OPRM1 DRD2 OPRD1 OPRK1 GRIN2B HTR3A ADRA2C HTR1A ADRA2A ADRA2B HTR4 CACNA2D1 HTR2C SIGMAR1 HTR2A CNR1 SLC6A2 SLC6A3 SLC18A2 SLC6A4 TACR1 DRD3 OPRL1 MAOA CYP2D6 NOS2 NOS1 CYP3A4 CNR2 CYP2C9 CYP2C19 CXCL8
Psychosis	1e-45	63	Psychiatric Disorder, Nervous System Disease	DRD2 DPP4 DRD3 SLC6A3 GRIN2B SLC6A4 HTR2C HTR1A ADRA2A MAOB ...	DRD2 DPP4 DRD3 SLC6A3 GRIN2B SLC6A4 HTR2C HTR1A ADRA2A MAOB HTR2A SLC18A2 CHRNA4 HTR3A HTR1D SLC6A2 HTR4 ADRA1A HTR2B ADRA2B ADRA2C CACNA2D1 ADRA1B FYN MAOA NOS1 NMUR2 CYP2D6 CYP2C19 CNR1 CHRNA7 OPRM1 TACR1 CES1 SIGMAR1 OPRD1 TAAR1 S1PR1 ART1 ILK S1PR3 S1PR4 S1PR5 UGT2B7 ADORA2A NUDT1 ADORA2B OPRK1 CYP2C9 CXCL8 SLC7A5 CNR2 OPRL1 NOS2 CYP3A4 PLAU HRH4 LCK RPS6KA3 ADRB1 ODC1 ADRB2 KIF11
Nervousness	8e-45	64	Psychiatric Disorder, Nervous System Disease	OPRM1 HRH4 CNR1 CNR2 CYP2D6 HTR2A TAAR1 HTR3A TACR1 CXCL8 ...	OPRM1 HRH4 CNR1 CNR2 CYP2D6 HTR2A TAAR1 HTR3A TACR1 CXCL8 MAOB NOS1 HTR1A ODC1 KDM1A SLC6A2 S1PR1 GRIN2B ADRB2 OPRL1 SLC7A5 SLC18A2 HTR2C NOS2 ADRA2C PNMT NMUR2 DRD2 ADRA2A DPP4 HTR4 RPS6KA3 ADRB1 HTR1D ADRA2B HTR2B DRD3 SIGMAR1 MAOA ANPEP KISS1R SLC6A4 PLAU CHRNA4 SLC6A3 METAP2 ADORA2A TRPV3 CYP2C19 CES2 CA14 AOC3 PNP CYP3A4 CHRNA7 ILK CES1 LCK ADRA1A ADRA1B S1PR3 S1PR4 S1PR5 FYN
Schizophrenia	1e-44	63	Psychiatric Disorder, Nervous System Disease	DRD2 DPP4 DRD3 SLC6A3 GRIN2B SLC6A4 HTR2C HTR1A ADRA2A MAOB ...	DRD2 DPP4 DRD3 SLC6A3 GRIN2B SLC6A4 HTR2C HTR1A ADRA2A MAOB HTR2A SLC18A2 CHRNA4 HTR3A HTR1D SLC6A2 HTR4 HTR2B ADRA1A ADRA2B ADRA2C CACNA2D1 ADRA1B FYN MAOA NOS1 NMUR2 CYP2D6 CYP2C19 CNR1 CHRNA7 OPRM1 TACR1 CES1 SIGMAR1 OPRD1 TAAR1 S1PR1 ART1 S1PR5 ILK S1PR3 S1PR4 UGT2B7 ADORA2A NUDT1 OPRK1 ADORA2B CYP2C9 CXCL8 CNR2 SLC7A5 OPRL1 NOS2 CYP3A4 PLAU HRH4 LCK ADRB1 ODC1 ADRB2 AOC3 KIF11
Attention deficit hyperactivity disorder	2e-44	45	Psychiatric Disorder, Nervous System Disease	SLC6A3 ADRA2A SLC6A4 GRIN2B HTR1A HTR2C OPRD1 OPRM1 SLC6A2 DRD2 ...	SLC6A3 ADRA2A SLC6A4 GRIN2B HTR1A HTR2C OPRD1 OPRM1 SLC6A2 DRD2 ADRA2C HTR2A ADORA2A SLC18A2 ADRA1B ADRA1A ADRA2B ADRB1 ADRB2 OPRK1 ADORA2B CHRNA4 DRD3 TACR1 CHRNA7 CNR1 CES1 MAOB HTR3A ART1 ILK TAAR1 MAOA CYP2D6 CYP3A4 HTR1D HTR4 CXCL8 NOS2 RPS6KA3 HTR2B CYP2C19 CYP2A6 NOS1 SLC7A5
Attention deficit-hyperactivity disorder	2e-44	45	Psychiatric Disorder, Nervous System Disease	SLC6A3 ADRA2A SLC6A4 GRIN2B HTR1A HTR2C OPRD1 OPRM1 SLC6A2 DRD2 ...	SLC6A3 ADRA2A SLC6A4 GRIN2B HTR1A HTR2C OPRD1 OPRM1 SLC6A2 DRD2 ADRA2C HTR2A ADORA2A SLC18A2 ADRA1B ADRA1A ADRB1 ADRA2B ADRB2 ADORA2B OPRK1 CHRNA4 DRD3 TACR1 CHRNA7 CNR1 CES1 MAOB HTR3A ART1 ILK TAAR1 MAOA CYP2D6 CYP3A4 HTR1D HTR4 CXCL8 NOS2 RPS6KA3 HTR2B CYP2C19 CYP2A6 NOS1 SLC7A5
Mood disorder	1e-43	60	Psychiatric Disorder, Nervous System Disease	DRD2 ADRA1B MAOA HTR1A SLC6A3 SLC6A2 HTR2A SLC6A4 GRIN2B HTR3A ...	DRD2 ADRA1B MAOA HTR1A SLC6A3 SLC6A2 HTR2A SLC6A4 GRIN2B HTR3A SLC18A2 OPRM1 HTR4 DRD3 TACR1 HTR2C MAOB HTR1D ADRB1 CHRNA4 ADRA2A HTR2B ADRA2C ADRB2 OPRK1 ADRA1A OPRD1 ADRA2B SIGMAR1 CACNA2D1 CYP2C19 CYP2D6 ADORA2A ADORA2B CNR1 OPRL1 CHRNA7 PNMT NUDT1 CYP2C9 DPP4 CXCL8 CNR2 NOS1 NOS2 CYP3A4 FYN KDM1A CDK9 UGT2B7 PLAU TAAR1 ODC1 HRH4 AOC3 SLC22A6 ANPEP CYP2A6 GSR MTAP
Psychiatric disorder	9e-43	86	Psychiatric Disorder	MAOA RPS6KA3 GRIN2B AHCY EBP SLC6A3 DRD2 CHRNA4 DPP4 DRD3 ...	MAOA RPS6KA3 GRIN2B AHCY EBP SLC6A3 DRD2 CHRNA4 DPP4 DRD3 OPRM1 SIGMAR1 ADRA2B ADRA1B SLC6A4 CNR1 TACR1 HTR1A ADRA2A HTR2C CHRNA7 MAOB SLC18A2 HTR3A ADORA2A OPRD1 HTR2A SLC6A2 HTR2B FYN ADRA1A CACNA2D1 ADRA2C ADRB2 OPRK1 HTR4 HTR1D ADRB1 ADORA2B NOS1 CYP2C19 NMUR2 CYP2D6 NOS2 KDM1A CES1 TRPV3 PLAU ILK KISS1R CNR2 ART1 PNP TAAR1 CYP3A4 OPRL1 PNMT CDC7 HRH4 S1PR1 S1PR5 S1PR3 S1PR4 KCNA5 MTAP CES2 C…
Alzheimer's disease	6e-42	67	Psychiatric Disorder, Nervous System Disease	GRIN2B HTR2A DRD2 ADRB1 SLC6A2 SLC6A4 ADRB2 HTR1A CHRNA4 SIGMAR1 ...	GRIN2B HTR2A DRD2 ADRB1 SLC6A2 SLC6A4 ADRB2 HTR1A CHRNA4 SIGMAR1 CHRNA7 SLC6A3 ADRA1A ADRA1B CACNA2D1 HTR2C DRD3 ADRA2A ADRA2B ADRA2C MAOB CNR1 HTR3A ADORA2A ADORA2B FYN HTR4 MAOA LCK CYP2D6 CXCL8 CNR2 ODC1 NOS2 KDM1A NOS1 CYP3A4 PLAU DPP4 AOC3 SLC18A2 PNMT OPRK1 CES1 NUDT1 SLC7A5 OPRL1 OPRD1 TACR1 S1PR1 OPRM1 ANPEP PNP CYP2C19 KIF11 DPP7 ILK CYP2C9 S1PR3 SLC22A6 KISS1R HRH4 CA14 CDK9 TAAR1 CDC7 …
Post-traumatic stress disorder	6e-42	35	Psychiatric Disorder, Nervous System Disease	DRD2 CNR1 HTR1A SLC6A4 ADRB2 DRD3 OPRM1 SLC6A2 HTR2C HTR2A ...	DRD2 CNR1 HTR1A SLC6A4 ADRB2 DRD3 OPRM1 SLC6A2 HTR2C HTR2A GRIN2B ADRA2B HTR3A ADRB1 ADRA1A ADRA1B ADRA2A ADRA2C OPRD1 OPRK1 TACR1 SLC6A3 MAOA MAOB CXCL8 NOS1 SLC18A2 OPRL1 DPP4 SIGMAR1 CHRNA7 CNR2 CHRNA4 NOS2 CYP2C9
Mental or behavioural disorder	1e-41	85	Psychiatric Disorder, Nervous System Disease	MAOA RPS6KA3 GRIN2B AHCY EBP SLC6A3 DRD2 CHRNA4 DPP4 DRD3 ...	MAOA RPS6KA3 GRIN2B AHCY EBP SLC6A3 DRD2 CHRNA4 DPP4 DRD3 OPRM1 SIGMAR1 ADRA2B ADRA1B SLC6A4 CNR1 TACR1 HTR1A ADRA2A HTR2C CHRNA7 SLC18A2 HTR3A MAOB ADORA2A OPRD1 HTR2A SLC6A2 HTR2B FYN ADRA1A CACNA2D1 ADRA2C ADRB2 OPRK1 HTR4 HTR1D ADRB1 ADORA2B NOS1 CYP2C19 NMUR2 CYP2D6 NOS2 KDM1A CES1 PLAU ILK KISS1R TRPV3 CNR2 ART1 PNP TAAR1 CYP3A4 OPRL1 PNMT CDC7 HRH4 S1PR1 S1PR5 S1PR3 S1PR4 KCNA5 CES2 CDK9 U…
Stress-related disorder	2e-40	36	Psychiatric Disorder, Nervous System Disease	DRD2 CNR1 HTR1A SLC6A4 ADRB2 DRD3 OPRM1 SLC6A2 HTR2C HTR2A ...	DRD2 CNR1 HTR1A SLC6A4 ADRB2 DRD3 OPRM1 SLC6A2 HTR2C HTR2A GRIN2B ADRA2B HTR3A ADRB1 ADRA2C ADRA1B OPRD1 ADRA2A ADRA1A OPRK1 TACR1 SLC6A3 MAOA MAOB CXCL8 NOS1 SLC18A2 OPRL1 DPP4 NOS2 SIGMAR1 CHRNA7 CNR2 CHRNA4 CYP2C9 HTR4
Pain agnosia	5e-40	31	Psychiatric Disorder, Nervous System Disease	OPRM1 HTR1A HTR2A CYP2D6 CNR1 CYP3A4 HTR3A OPRL1 OPRD1 CNR2 ...	OPRM1 HTR1A HTR2A CYP2D6 CNR1 CYP3A4 HTR3A OPRL1 OPRD1 CNR2 SIGMAR1 TACR1 UGT2B7 RPS6KA3 ADRA2A NOS1 CXCL8 GRIN2B ADRB1 DPP4 DRD2 HTR4 OPRK1 SLC6A2 HTR2C NOS2 MAOB ANPEP SLC6A4 CYP2C9 KISS1R
Cannabis dependence	2e-39	22	Psychiatric Disorder, Nervous System Disease	DRD2 HTR1A CHRNA4 HTR2A DRD3 HTR3A SLC6A4 CNR1 HTR2C SLC6A2 ...	DRD2 HTR1A CHRNA4 HTR2A DRD3 HTR3A SLC6A4 CNR1 HTR2C SLC6A2 ADRA2C ADRA2A OPRD1 ADRA2B OPRK1 OPRM1 TACR1 SLC6A3 CACNA2D1 MAOB GRIN2B CNR2
Specific developmental disorder	3e-39	46	Psychiatric Disorder, Nervous System Disease	SLC6A3 DRD3 ADRA2A GRIN2B SLC6A4 HTR1A HTR2C OPRM1 OPRD1 SLC6A2 ...	SLC6A3 DRD3 ADRA2A GRIN2B SLC6A4 HTR1A HTR2C OPRM1 OPRD1 SLC6A2 DRD2 ADRA2C HTR2A ADORA2A SLC18A2 ADRA1B ADRA1A ADRB1 ADRA2B ADRB2 OPRK1 ADORA2B CHRNA4 CNR1 TACR1 CHRNA7 CES1 MAOB HTR3A ART1 ILK TAAR1 MAOA CYP2D6 CYP3A4 HTR1D CXCL8 HTR4 HTR2B RPS6KA3 NOS2 CYP2C19 CYP2A6 NOS1 SLC7A5 CYP2C9
Eating disorder	3e-39	31	Psychiatric Disorder, Nervous System Disease, Nutritional Or Metabolic Disease	HTR2A SLC6A4 DRD2 SLC6A3 HTR2C HTR1A SLC6A2 GRIN2B DRD3 SLC18A2 ...	HTR2A SLC6A4 DRD2 SLC6A3 HTR2C HTR1A SLC6A2 GRIN2B DRD3 SLC18A2 CNR1 OPRM1 OPRD1 OPRK1 HTR3A HTR4 HTR1D HTR2B CNR2 DPP4 CYP2D6 ADRB2 OPRL1 MAOA NMUR2 CYP3A4 TAAR1 NOS2 MAOB CYP2C9 CYP2C19
Agnosia	4e-39	31	Psychiatric Disorder, Nervous System Disease	OPRM1 HTR1A HTR2A CYP2D6 CNR1 CYP3A4 HTR3A OPRL1 OPRD1 CNR2 ...	OPRM1 HTR1A HTR2A CYP2D6 CNR1 CYP3A4 HTR3A OPRL1 OPRD1 CNR2 SIGMAR1 TACR1 UGT2B7 RPS6KA3 ADRA2A NOS1 CXCL8 GRIN2B ADRB1 DPP4 DRD2 HTR4 OPRK1 SLC6A2 HTR2C NOS2 MAOB ANPEP SLC6A4 CYP2C9 KISS1R
Developmental disorder of mental health	1e-38	76	Psychiatric Disorder, Nervous System Disease	RPS6KA3 GRIN2B MAOA AHCY EBP DRD2 SLC6A3 ADRA2A ADRA2B SLC6A4 ...	RPS6KA3 GRIN2B MAOA AHCY EBP DRD2 SLC6A3 ADRA2A ADRA2B SLC6A4 DRD3 CNR1 HTR1A HTR2C SLC18A2 HTR2A SLC6A2 ADORA2A OPRM1 OPRD1 ADRA1B ADRA1A ADRA2C ADRB2 ADRB1 ADORA2B OPRK1 SIGMAR1 CHRNA4 CHRNA7 HTR3A NOS1 TACR1 CES1 KDM1A NOS2 MAOB ILK DPP4 KISS1R PLAU TRPV3 ART1 CNR2 FYN HTR2B PNP CYP2D6 CYP3A4 TAAR1 CDC7 HRH4 PNMT CES2 MTAP CDK9 S1PR1 S1PR3 S1PR4 S1PR5 CACNA2D1 CXCL8 HTR4 KIF11 HTR1D CYP2C19 AN…
Obsessive-compulsive disorder	4e-38	28	Psychiatric Disorder, Nervous System Disease, Genetic, Familial Or Congenital Disease	SLC6A4 HTR2A DRD2 SLC6A3 HTR3A DRD3 HTR2C ADRB2 ADRB1 CACNA2D1 ...	SLC6A4 HTR2A DRD2 SLC6A3 HTR3A DRD3 HTR2C ADRB2 ADRB1 CACNA2D1 SLC6A2 GRIN2B OPRM1 OPRD1 OPRK1 HTR1A HTR1D HTR2B CNR1 HTR4 MAOA CYP2D6 CYP2C19 SLC18A2 SIGMAR1 MAOB CXCL8 TACR1
X-linked syndromic intellectual disability	2e-36	61	Psychiatric Disorder, Nervous System Disease, Genetic, Familial Or Congenital Disease	RPS6KA3 MAOA ADRB2 ADRB1 ADRA1B ADRA1A CNR1 SIGMAR1 DRD2 DRD3 ...	RPS6KA3 MAOA ADRB2 ADRB1 ADRA1B ADRA1A CNR1 SIGMAR1 DRD2 DRD3 GRIN2B HTR1A NOS1 SLC6A4 ADORA2A SLC6A3 NOS2 DPP4 CES1 ADRA2A SLC18A2 HTR3A HTR2C KDM1A ILK KISS1R PLAU TACR1 TRPV3 CHRNA7 SLC6A2 OPRD1 ART1 ADRA2B CNR2 EBP MAOB HTR2A AHCY CHRNA4 OPRM1 CDK9 ADORA2B S1PR3 S1PR4 S1PR5 S1PR1 CXCL8 CYP2D6 CYP2C9 HTR2B CACNA2D1 CYP2C19 SLC7A5 CYP3A4 DPP7 SLC22A6 MTAP ODC1 KIF11 NUDT1
Pervasive developmental disorder	4e-36	47	Psychiatric Disorder, Nervous System Disease	GRIN2B DRD2 SLC6A4 MAOA HTR1A HTR2A SLC6A2 HTR2C ADRA2B ADRA2C ...	GRIN2B DRD2 SLC6A4 MAOA HTR1A HTR2A SLC6A2 HTR2C ADRA2B ADRA2C ADRA2A CNR1 SIGMAR1 DRD3 SLC18A2 SLC6A3 CYP2D6 OPRD1 ILK ART1 ADRB2 OPRM1 S1PR1 S1PR4 OPRK1 S1PR3 S1PR5 CACNA2D1 ADRB1 NOS1 CHRNA7 DPP4 HTR4 CXCL8 MAOB CYP2C19 ADORA2A HRH4 CNR2 HTR2B FYN CHRNA4 HTR1D ANPEP HTR3A RPS6KA3 PLAU
Insomnia	1e-35	29	Psychiatric Disorder, Nervous System Disease	SLC6A3 HTR2A SLC6A4 HTR2C CACNA2D1 ADRA2A ADRA2C ADRA2B SLC6A2 TACR1 ...	SLC6A3 HTR2A SLC6A4 HTR2C CACNA2D1 ADRA2A ADRA2C ADRA2B SLC6A2 TACR1 DRD2 SLC18A2 CXCL8 MAOB ADORA2A OPRM1 HTR1A HTR3A CYP3A4 CYP2C19 ADRB1 DRD3 OPRK1 MAOA HTR1D HTR2B CYP2C9 CNR1 GRIN2B
Syndromic intellectual disability	1e-34	70	Psychiatric Disorder, Nervous System Disease	RPS6KA3 MAOA AHCY EBP GRIN2B CNR1 ADRA1B ADRA1A ADRB2 ADRB1 ...	RPS6KA3 MAOA AHCY EBP GRIN2B CNR1 ADRA1B ADRA1A ADRB2 ADRB1 SIGMAR1 DRD2 DRD3 SLC6A4 HTR1A NOS1 HTR2C ADORA2A NOS2 KDM1A CES1 SLC6A3 KISS1R DPP4 TRPV3 ILK ADRA2A PLAU SLC18A2 CHRNA7 HTR3A CNR2 TACR1 HTR2B OPRM1 MAOB FYN PNP ART1 OPRD1 CYP3A4 CDC7 SLC6A2 ADRA2B HRH4 PNMT HTR2A CHRNA4 CES2 MTAP CDK9 ADORA2B S1PR1 S1PR3 S1PR4 S1PR5 CXCL8 KIF11 CACNA2D1 CYP2D6 ANPEP CYP2C9 METAP2 SLC7A5 CYP2C19 ODC1 …
Sleep disorder	3e-34	40	Psychiatric Disorder, Nervous System Disease	GRIN2B SLC6A3 HTR2C HTR2A SLC18A2 SLC6A4 OPRM1 ADRB1 SLC6A2 ADRA2C ...	GRIN2B SLC6A3 HTR2C HTR2A SLC18A2 SLC6A4 OPRM1 ADRB1 SLC6A2 ADRA2C ADRA2B ADRA2A CACNA2D1 DRD2 HTR1A TACR1 NOS2 ADRB2 CNR1 KCNA5 FYN ADORA2A ADORA2B MAOA CXCL8 TAAR1 CYP2D6 HTR3A DPP4 MAOB DRD3 CYP3A4 CYP2C19 TRPV3 OPRK1 CYP2C9 HRH4 HTR1D HTR2B CNR2
Alcohol withdrawal	4e-34	22	Psychiatric Disorder, Nervous System Disease	GRIN2B ADRA2B ADRA2C ADRA2A CACNA2D1 DRD2 CNR1 CYP2C19 OPRM1 CXCL8 ...	GRIN2B ADRA2B ADRA2C ADRA2A CACNA2D1 DRD2 CNR1 CYP2C19 OPRM1 CXCL8 SLC6A4 SLC18A2 HTR2C HTR1A MAOA SLC6A3 MAOB TACR1 CNR2 SLC6A2 HTR2A DRD3
Heroin dependence	2e-32	20	Psychiatric Disorder, Nervous System Disease	OPRM1 OPRD1 OPRK1 HTR1A ADRA2B ADRA2A ADRA2C HTR2A HTR2C GRIN2B ...	OPRM1 OPRD1 OPRK1 HTR1A ADRA2B ADRA2A ADRA2C HTR2A HTR2C GRIN2B TACR1 DRD2 DRD3 MAOA CNR1 SLC6A3 SLC6A2 NOS2 SLC6A4 CXCL8
Methamphetamine dependence	2e-31	19	Psychiatric Disorder, Nervous System Disease	DRD2 SLC6A3 HTR2A HTR1A HTR2C SLC6A2 OPRM1 OPRK1 OPRD1 CHRNA4 ...	DRD2 SLC6A3 HTR2A HTR1A HTR2C SLC6A2 OPRM1 OPRK1 OPRD1 CHRNA4 SLC18A2 SLC6A4 ADRA1B ADRA1A GRIN2B CYP2D6 CNR1 CNR2 DRD3
Genetic dementia	3e-31	55	Psychiatric Disorder, Nervous System Disease, Genetic, Familial Or Congenital Disease	SLC18A2 GRIN2B SLC6A3 SLC6A4 DRD2 SLC6A2 HTR2C HTR2A DRD3 MAOB ...	SLC18A2 GRIN2B SLC6A3 SLC6A4 DRD2 SLC6A2 HTR2C HTR2A DRD3 MAOB HTR3A NOS2 PNP PLAU ADRA2B CHRNA7 CES1 KDM1A ILK CHRNA4 ADRA1A NOS1 ADORA2A FYN CNR1 PNMT TRPV3 KISS1R ADRA1B CXCL8 MAOA CYP3A4 CNR2 CHEK1 SIGMAR1 ODC1 OPRM1 DPP4 HTR1A S1PR5 CYP2D6 AOC3 HTR4 KCNA5 CDC7 CYP2A6 CYP2C9 CDK9 ADRB2 TAAR1 CYP2C19 S1PR1 HTR1D DPP7 ADRB1
Autism spectrum disorder	3e-31	42	Psychiatric Disorder, Nervous System Disease	GRIN2B DRD2 SLC6A4 MAOA HTR1A HTR2A SLC6A2 HTR2C ADRA2B ADRA2A ...	GRIN2B DRD2 SLC6A4 MAOA HTR1A HTR2A SLC6A2 HTR2C ADRA2B ADRA2A ADRA2C DRD3 SLC18A2 SLC6A3 CYP2D6 SIGMAR1 CNR1 ILK OPRD1 ART1 ADRB2 CACNA2D1 ADRB1 NOS1 CHRNA7 DPP4 HTR4 CXCL8 MAOB CYP2C19 ADORA2A HRH4 CNR2 HTR2B FYN CHRNA4 HTR1D ANPEP HTR3A OPRM1 RPS6KA3 PLAU
Anorexia nervosa	3e-31	22	Psychiatric Disorder, Nervous System Disease, Nutritional Or Metabolic Disease	HTR2A SLC6A4 DRD2 DRD3 HTR2C HTR1A CNR1 HTR2B HTR1D HTR3A ...	HTR2A SLC6A4 DRD2 DRD3 HTR2C HTR1A CNR1 HTR2B HTR1D HTR3A HTR4 SLC6A2 OPRD1 GRIN2B DPP4 ADRB2 CYP3A4 MAOB CYP2C9 CYP2C19 CYP2D6 CNR2
Bipolar disorder	4e-31	38	Psychiatric Disorder, Nervous System Disease	HTR2A DRD2 MAOA GRIN2B SLC6A3 SLC18A2 DRD3 SLC6A4 MAOB HTR2C ...	HTR2A DRD2 MAOA GRIN2B SLC6A3 SLC18A2 DRD3 SLC6A4 MAOB HTR2C SLC6A2 HTR1A ADRA2C ADRA2A ADRA2B SIGMAR1 HTR3A CNR1 HTR4 HTR1D HTR2B PNMT TACR1 NUDT1 CXCL8 CYP2D6 CHRNA7 FYN OPRM1 CYP3A4 CYP2C19 CYP2C9 OPRL1 TAAR1 NOS1 NOS2 PLAU CACNA2D1
Schizoaffective disorder	5e-31	24	Psychiatric Disorder, Nervous System Disease	DRD3 ADRA1A DRD2 HTR2A ADRA2B ADRA2C ADRA2A ADRA1B HTR4 SLC6A4 ...	DRD3 ADRA1A DRD2 HTR2A ADRA2B ADRA2C ADRA2A ADRA1B HTR4 SLC6A4 SLC6A2 HTR1D SLC6A3 HTR2B CHRNA4 GRIN2B HTR1A HTR3A HTR2C CNR1 CHRNA7 CYP2D6 CXCL8 MAOA
Panic disorder	7e-30	22	Psychiatric Disorder, Nervous System Disease	HTR1A HTR2C HTR2A SLC6A2 DRD2 SLC6A4 HTR3A ADRB2 ADRB1 MAOA ...	HTR1A HTR2C HTR2A SLC6A2 DRD2 SLC6A4 HTR3A ADRB2 ADRB1 MAOA CHRNA4 CYP2C19 DPP4 ADORA2A HTR1D CNR1 CNR2 TACR1 CYP2D6 NOS1 CXCL8 SLC18A2
Autism	9e-28	41	Psychiatric Disorder, Nervous System Disease	GRIN2B MAOA SLC6A4 DRD2 HTR1A HTR2A HTR2C SLC6A2 ADRA2B ADRA2C ...	GRIN2B MAOA SLC6A4 DRD2 HTR1A HTR2A HTR2C SLC6A2 ADRA2B ADRA2C ADRA2A DRD3 SLC18A2 SLC6A3 CNR1 SIGMAR1 ILK ART1 OPRD1 NOS1 ADRB2 CHRNA7 DPP4 CXCL8 CYP2D6 HRH4 NOS2 TACR1 CNR2 HTR2B FYN HTR4 CHRNA4 MAOB OPRM1 ANPEP HTR1D HTR3A RPS6KA3 PLAU CYP2C19
Amnesia	1e-27	18	Psychiatric Disorder, Nervous System Disease	ADRA2B ADRA2A ADRA2C CNR1 HTR1A HTR4 ADRB2 HTR2A HTR3A ADRB1 ...	ADRA2B ADRA2A ADRA2C CNR1 HTR1A HTR4 ADRB2 HTR2A HTR3A ADRB1 SIGMAR1 DRD2 CNR2 GRIN2B NOS2 OPRM1 TRPV3 DPP4
Genetic neurodegenerative disease with dementia	4e-26	47	Psychiatric Disorder, Nervous System Disease, Genetic, Familial Or Congenital Disease	SLC18A2 SLC6A3 SLC6A4 DRD2 GRIN2B SLC6A2 HTR2C HTR2A DRD3 MAOB ...	SLC18A2 SLC6A3 SLC6A4 DRD2 GRIN2B SLC6A2 HTR2C HTR2A DRD3 MAOB NOS2 HTR3A PNP PLAU CHRNA7 CES1 ILK CHRNA4 NOS1 ADORA2A FYN CNR1 KDM1A PNMT TRPV3 KISS1R CXCL8 MAOA CNR2 CHEK1 CYP3A4 SIGMAR1 ODC1 HTR1A S1PR5 CYP2D6 HTR4 CDC7 KCNA5 CDK9 CYP2A6 DPP4 HTR1D DPP7 ADRB2 CYP2C9 TAAR1
Sleep-wake disorder	4e-26	30	Psychiatric Disorder, Nervous System Disease	SLC6A2 SLC18A2 SLC6A3 ADRB1 ADRA2B ADRA2A ADRA2C GRIN2B SLC6A4 OPRM1 ...	SLC6A2 SLC18A2 SLC6A3 ADRB1 ADRA2B ADRA2A ADRA2C GRIN2B SLC6A4 OPRM1 HTR2C DRD2 NOS2 HTR2A ADRB2 CNR1 KCNA5 FYN ADORA2A ADORA2B CXCL8 TAAR1 MAOA CYP2D6 DPP4 HTR3A HTR1A TACR1 MAOB CNR2
Huntington disease	7e-26	27	Psychiatric Disorder, Nervous System Disease, Genetic, Familial Or Congenital Disease	SLC18A2 GRIN2B DRD2 HTR2A DRD3 HTR2C CNR1 SLC6A3 SLC6A2 ADORA2A ...	SLC18A2 GRIN2B DRD2 HTR2A DRD3 HTR2C CNR1 SLC6A3 SLC6A2 ADORA2A SLC6A4 CNR2 MAOA NOS1 HTR3A MAOB CXCL8 HTR1A S1PR5 SIGMAR1 HTR4 HTR1D DPP7 ADRB2 NOS2 TAAR1 KCNA5
Tourette syndrome	1e-25	18	Psychiatric Disorder, Nervous System Disease, Genetic, Familial Or Congenital Disease	HTR2A DRD2 DRD3 HTR1A ADRA2C ADRA2A ADRA2B SLC18A2 CNR1 HTR2C ...	HTR2A DRD2 DRD3 HTR1A ADRA2C ADRA2A ADRA2B SLC18A2 CNR1 HTR2C SLC6A2 SLC6A3 MAOA ADORA2A CXCL8 HTR2B GRIN2B OPRM1
Tic disorder	2e-25	18	Psychiatric Disorder, Nervous System Disease	HTR2A DRD2 DRD3 HTR1A ADRA2A ADRA2C ADRA2B SLC18A2 CNR1 HTR2C ...	HTR2A DRD2 DRD3 HTR1A ADRA2A ADRA2C ADRA2B SLC18A2 CNR1 HTR2C SLC6A2 SLC6A3 MAOA ADORA2A CXCL8 HTR2B GRIN2B OPRM1
Morphine dependence	6e-25	15	Psychiatric Disorder, Nervous System Disease	OPRM1 OPRK1 OPRD1 NOS2 HTR3A NOS1 GRIN2B DRD2 SLC18A2 CNR1 ...	OPRM1 OPRK1 OPRD1 NOS2 HTR3A NOS1 GRIN2B DRD2 SLC18A2 CNR1 HTR1A OPRL1 DRD3 SLC6A3 HTR2A
Delirium	3e-24	21	Psychiatric Disorder, Nervous System Disease	DRD2 HTR2A DRD3 GRIN2B ADRA2B ADRA2C ADRA2A HTR2C OPRM1 SLC6A3 ...	DRD2 HTR2A DRD3 GRIN2B ADRA2B ADRA2C ADRA2A HTR2C OPRM1 SLC6A3 SLC6A2 OPRD1 OPRK1 CXCL8 HTR3A CYP3A4 CYP2C19 HTR1A CYP2D6 NOS2 HRH4
Phobic disorder	4e-24	23	Psychiatric Disorder, Nervous System Disease	DRD2 HTR2A HTR1A SLC6A4 SLC6A2 ADRB1 ADRB2 HTR2C GRIN2B TACR1 ...	DRD2 HTR2A HTR1A SLC6A4 SLC6A2 ADRB1 ADRB2 HTR2C GRIN2B TACR1 ADRA2B ADRA2A ADRA2C CACNA2D1 CNR1 MAOA SLC18A2 OPRM1 ADORA2A CYP2D6 SLC6A3 HTR1D CHRNA7
Metabolic disease with dementia	2e-23	40	Psychiatric Disorder, Nervous System Disease, Nutritional Or Metabolic Disease, Genetic, Familial Or Congenital Disease	SLC6A2 DRD2 HTR3A GRIN2B PNP ADRA2B HTR2C SLC18A2 KDM1A ADRA1A ...	SLC6A2 DRD2 HTR3A GRIN2B PNP ADRA2B HTR2C SLC18A2 KDM1A ADRA1A NOS2 FYN PLAU TRPV3 CES1 KISS1R ADRA1B CXCL8 CHEK1 CYP3A4 ODC1 DPP4 OPRM1 CNR1 AOC3 CNR2 CYP2A6 CYP2D6 NOS1 CDK9 CYP2C9 SLC6A3 MAOB CYP2C19 ADRB2 MAOA S1PR1 PNMT KCNA5 ADRB1
Bulimia nervosa	3e-23	15	Psychiatric Disorder, Nervous System Disease, Nutritional Or Metabolic Disease	SLC6A2 SLC6A3 SLC18A2 HTR2A CNR1 DRD2 SLC6A4 OPRM1 HTR2C MAOA ...	SLC6A2 SLC6A3 SLC18A2 HTR2A CNR1 DRD2 SLC6A4 OPRM1 HTR2C MAOA DPP4 ADRB2 HTR1A HTR3A DRD3
Vascular dementia	8e-23	20	Psychiatric Disorder, Nervous System Disease, Cardiovascular Disease	ADRA2B ADRA2A ADRA1B ADRA2C ADRA1A HTR1A DRD3 DRD2 CYP2D6 NOS2 ...	ADRA2B ADRA2A ADRA1B ADRA2C ADRA1A HTR1A DRD3 DRD2 CYP2D6 NOS2 CNR2 HTR2A SLC6A2 DPP4 MAOB SIGMAR1 ADRB2 TACR1 GRIN2B CYP3A4
Sleep apnea	1e-22	24	Psychiatric Disorder, Nervous System Disease, Respiratory Or Thoracic Disease	ADRA2B ADRA2C SLC6A3 ADRA2A SLC6A4 OPRM1 GRIN2B SLC6A2 ADRB2 CNR1 ...	ADRA2B ADRA2C SLC6A3 ADRA2A SLC6A4 OPRM1 GRIN2B SLC6A2 ADRB2 CNR1 ADRB1 KCNA5 FYN HTR2A HTR2C CXCL8 DPP4 HTR3A HTR1A CYP2D6 NOS2 TACR1 MAOA CNR2
Specific phobia	7e-22	12	Psychiatric Disorder, Nervous System Disease, Genetic, Familial Or Congenital Disease	ADRB1 ADRA2C ADRA2B ADRB2 HTR2C ADRA2A DRD2 HTR2A CACNA2D1 GRIN2B ...	ADRB1 ADRA2C ADRA2B ADRB2 HTR2C ADRA2A DRD2 HTR2A CACNA2D1 GRIN2B TACR1 ADORA2A
Generalized anxiety disorder	4e-21	18	Psychiatric Disorder, Nervous System Disease	SLC6A4 SLC6A2 HTR1A HTR3A CACNA2D1 GRIN2B HTR2A DRD2 HTR2C MAOA ...	SLC6A4 SLC6A2 HTR1A HTR3A CACNA2D1 GRIN2B HTR2A DRD2 HTR2C MAOA SLC6A3 OPRM1 NOS1 TACR1 DRD3 CXCL8 HTR1D SLC18A2
Treatment resistant depression	4e-21	14	Psychiatric Disorder, Nervous System Disease	SLC6A2 GRIN2B HTR1A SLC6A4 HTR2C HTR2A SLC6A3 DRD2 DRD3 DPP4 ...	SLC6A2 GRIN2B HTR1A SLC6A4 HTR2C HTR2A SLC6A3 DRD2 DRD3 DPP4 CYP2C19 MAOA CYP2D6 HTR2B
Obstructive sleep apnea	7e-21	20	Psychiatric Disorder, Nervous System Disease, Respiratory Or Thoracic Disease	ADRA2B ADRA2A ADRA2C SLC6A3 SLC6A4 GRIN2B SLC6A2 OPRM1 ADRB2 CNR1 ...	ADRA2B ADRA2A ADRA2C SLC6A3 SLC6A4 GRIN2B SLC6A2 OPRM1 ADRB2 CNR1 ADRB1 KCNA5 FYN HTR2A HTR2C CXCL8 DPP4 CYP2D6 NOS2 CNR2
Personality disorder (disease)	1e-20	15	Psychiatric Disorder	ADRA2B ADRA2C ADRA2A DRD2 HTR2A HTR2C MAOA CYP2D6 DRD3 HTR1A ...	ADRA2B ADRA2C ADRA2A DRD2 HTR2A HTR2C MAOA CYP2D6 DRD3 HTR1A HTR2B SLC18A2 SLC6A4 MAOB MTAP
Treatment refractory schizophrenia	2e-20	12	Psychiatric Disorder, Nervous System Disease	CYP2C19 UGT2B7 CYP2C9 DRD3 DRD2 CYP2D6 HTR3A HTR2A HTR4 GRIN2B ...	CYP2C19 UGT2B7 CYP2C9 DRD3 DRD2 CYP2D6 HTR3A HTR2A HTR4 GRIN2B SLC18A2 ADRA2C
Impulse control disorder	3e-20	17	Psychiatric Disorder	DRD3 MAOB OPRM1 MAOA DRD2 HTR2A SLC6A3 GRIN2B CNR1 DPP4 ...	DRD3 MAOB OPRM1 MAOA DRD2 HTR2A SLC6A3 GRIN2B CNR1 DPP4 CYP2D6 KDM1A CYP2C19 OPRK1 SLC6A4 CXCL8 ADRA2B
Social anxiety disorder	9e-20	17	Psychiatric Disorder, Nervous System Disease	DRD2 HTR2A HTR1A SLC6A4 SLC6A2 ADRB1 ADRB2 GRIN2B HTR2C TACR1 ...	DRD2 HTR2A HTR1A SLC6A4 SLC6A2 ADRB1 ADRB2 GRIN2B HTR2C TACR1 CNR1 MAOA SLC18A2 OPRM1 CYP2D6 SLC6A3 HTR1D
Bipolar i disorder	2e-19	14	Psychiatric Disorder, Nervous System Disease	DRD2 HTR1A HTR2A DRD3 HTR2C SLC6A3 SLC6A2 SLC6A4 GRIN2B NUDT1 ...	DRD2 HTR1A HTR2A DRD3 HTR2C SLC6A3 SLC6A2 SLC6A4 GRIN2B NUDT1 SLC18A2 CYP3A4 CXCL8 NOS1
Alcohol abuse	2e-19	12	Psychiatric Disorder	OPRK1 OPRD1 HTR2C SLC6A4 HTR2A DRD2 OPRM1 GRIN2B HTR3A SLC6A2 ...	OPRK1 OPRD1 HTR2C SLC6A4 HTR2A DRD2 OPRM1 GRIN2B HTR3A SLC6A2 SLC6A3 SIGMAR1
Neonatal abstinence syndrome	2e-18	10	Psychiatric Disorder, Nervous System Disease	OPRM1 ADRA2B ADRA2C ADRA2A OPRK1 DRD2 DRD3 HTR2A CYP2D6 CYP2C19	OPRM1 ADRA2B ADRA2C ADRA2A OPRK1 DRD2 DRD3 HTR2A CYP2D6 CYP2C19
Genetic multiple congenital anomalies/dysmorphic syndrome-variable intellectual disability syndrome	3e-18	37	Psychiatric Disorder, Nervous System Disease, Genetic, Familial Or Congenital Disease	CNR1 SIGMAR1 HTR2C CES1 TRPV3 KISS1R ILK HTR2B SLC6A3 DRD3 ...	CNR1 SIGMAR1 HTR2C CES1 TRPV3 KISS1R ILK HTR2B SLC6A3 DRD3 NOS2 OPRM1 DRD2 HTR3A CHRNA7 TACR1 SLC6A4 PLAU HRH4 DPP4 NOS1 GRIN2B MAOB ART1 ADRA2A ADRB1 HTR1A OPRD1 FYN SLC18A2 ADRA1B KIF11 CYP3A4 METAP2 CXCL8 ADORA2A ODC1
Genetic multiple congenital anomalies/dysmorphic syndrome - variable intellectual disability	3e-18	37	Psychiatric Disorder, Nervous System Disease, Genetic, Familial Or Congenital Disease	CNR1 SIGMAR1 HTR2C CES1 TRPV3 KISS1R ILK HTR2B SLC6A3 DRD3 ...	CNR1 SIGMAR1 HTR2C CES1 TRPV3 KISS1R ILK HTR2B SLC6A3 DRD3 NOS2 OPRM1 DRD2 HTR3A CHRNA7 TACR1 SLC6A4 PLAU HRH4 DPP4 NOS1 GRIN2B MAOB ART1 ADRB1 OPRD1 ADRA2A HTR1A FYN SLC18A2 ADRA1B KIF11 CYP3A4 METAP2 CXCL8 ADORA2A ODC1
Cocaine use disorder	5e-18	11	Psychiatric Disorder	HTR2C DRD3 DRD2 SLC6A3 SLC6A2 SLC6A4 HTR2A OPRL1 SIGMAR1 TAAR1 ...	HTR2C DRD3 DRD2 SLC6A3 SLC6A2 SLC6A4 HTR2A OPRL1 SIGMAR1 TAAR1 MAOA
Non-syndromic intellectual disability	9e-18	31	Psychiatric Disorder, Nervous System Disease	GRIN2B RPS6KA3 SLC6A3 DRD3 HTR1A SLC6A4 CES1 CNR1 HTR2C TACR1 ...	GRIN2B RPS6KA3 SLC6A3 DRD3 HTR1A SLC6A4 CES1 CNR1 HTR2C TACR1 OPRD1 ILK ART1 HTR2A MAOB ADRA2A FYN MAOA DRD2 PLAU KDM1A NOS2 OPRM1 CHRNA4 ADRA2B NOS1 SLC18A2 TRPV3 TAAR1 SLC6A2 HTR3A
Binge eating	1e-17	12	Psychiatric Disorder, Nervous System Disease, Nutritional Or Metabolic Disease	OPRM1 DRD2 SLC6A3 HTR2A SLC6A4 OPRL1 NMUR2 HTR2C CNR1 TAAR1 ...	OPRM1 DRD2 SLC6A3 HTR2A SLC6A4 OPRL1 NMUR2 HTR2C CNR1 TAAR1 NOS2 HTR3A
Duchenne and becker muscular dystrophy	3e-17	26	Musculoskeletal Or Connective Tissue Disease, Psychiatric Disorder, Nervous System Disease, Cardiovascular Disease, Respiratory Or Thoracic Disease, Genetic, Familial Or Congenital Disease	ADRB2 ADRA1B ADRA1A ADRB1 CDK9 KISS1R ADORA2A ADORA2B NOS1 DPP4 ...	ADRB2 ADRA1B ADRA1A ADRB1 CDK9 KISS1R ADORA2A ADORA2B NOS1 DPP4 CNR2 NOS2 MAOB CNR1 CYP2D6 CXCL8 CACNA2D1 HTR2B CYP2C9 MAOA CYP2C19 DRD2 OPRM1 S1PR3 ADRA2A MTAP
Alcohol withdrawal delirium	4e-17	9	Psychiatric Disorder, Nervous System Disease	ADRA2B ADRA2C ADRA2A DRD2 SLC6A4 SLC6A3 CNR1 OPRM1 DRD3	ADRA2B ADRA2C ADRA2A DRD2 SLC6A4 SLC6A3 CNR1 OPRM1 DRD3
Dysphoria	1e-16	9	Psychiatric Disorder, Nervous System Disease	SLC6A4 OPRM1 HTR1A CYP2D6 DRD2 MAOA CNR1 HTR2C HSD17B3	SLC6A4 OPRM1 HTR1A CYP2D6 DRD2 MAOA CNR1 HTR2C HSD17B3
Pathological gambling	2e-16	7	Psychiatric Disorder, Nervous System Disease, Genetic, Familial Or Congenital Disease	MAOA DRD2 HTR2A MAOB GRIN2B DRD3 OPRM1	MAOA DRD2 HTR2A MAOB GRIN2B DRD3 OPRM1
Autosomal recessive non-syndromic intellectual disability	3e-16	26	Psychiatric Disorder, Nervous System Disease, Genetic, Familial Or Congenital Disease	SLC6A3 DRD3 HTR1A CNR1 SLC6A4 TACR1 CES1 HTR2C OPRD1 FYN ...	SLC6A3 DRD3 HTR1A CNR1 SLC6A4 TACR1 CES1 HTR2C OPRD1 FYN GRIN2B ART1 ILK MAOB HTR2A ADRA2B ADRA2A MAOA OPRM1 TAAR1 KDM1A PLAU SLC18A2 DRD2 SLC6A2 CHRNA4
Alcoholic liver disease	6e-16	18	Endocrine System Disease, Psychiatric Disorder, Gastrointestinal Disease	ADORA2A ADRB2 ADRB1 ADORA2B CXCL8 CNR2 CYP2A6 S1PR1 CNR1 NOS2 ...	ADORA2A ADRB2 ADRB1 ADORA2B CXCL8 CNR2 CYP2A6 S1PR1 CNR1 NOS2 CYP3A4 CYP2C19 AOC3 CES1 UGT2B7 PLAU ADRA2A CYP2C9
Narcolepsy	8e-16	12	Psychiatric Disorder, Nervous System Disease	SLC6A2 SLC18A2 SLC6A3 ADORA2A ADORA2B TAAR1 MAOA DRD2 CXCL8 HTR2A ...	SLC6A2 SLC18A2 SLC6A3 ADORA2A ADORA2B TAAR1 MAOA DRD2 CXCL8 HTR2A HTR1A MAOB
Alcohol-induced disorders	1e-15	18	Psychiatric Disorder	ADRB1 ADRB2 ADORA2A ADORA2B CXCL8 CNR2 CYP2A6 S1PR1 CNR1 NOS2 ...	ADRB1 ADRB2 ADORA2A ADORA2B CXCL8 CNR2 CYP2A6 S1PR1 CNR1 NOS2 CYP3A4 CYP2C19 AOC3 CES1 UGT2B7 PLAU ADRA2A CYP2C9
Rett syndrome	2e-15	13	Psychiatric Disorder, Nervous System Disease, Genetic, Familial Or Congenital Disease	CNR1 SIGMAR1 HTR1A GRIN2B DRD3 SLC6A2 DRD2 SLC18A2 S1PR3 S1PR1 ...	CNR1 SIGMAR1 HTR1A GRIN2B DRD3 SLC6A2 DRD2 SLC18A2 S1PR3 S1PR1 S1PR5 S1PR4 CHRNA7
Ataxia with dementia	3e-15	32	Psychiatric Disorder, Nervous System Disease, Genetic, Familial Or Congenital Disease	SLC6A3 SLC6A4 SLC6A2 DRD2 HTR3A PNP PLAU NOS2 SLC18A2 CHRNA7 ...	SLC6A3 SLC6A4 SLC6A2 DRD2 HTR3A PNP PLAU NOS2 SLC18A2 CHRNA7 CES1 ILK CHRNA4 NOS1 FYN HTR2C ADORA2A PNMT TRPV3 KISS1R KDM1A CXCL8 CHEK1 CYP3A4 ODC1 MAOB CDK9 CYP2A6 DPP4 HTR1A CYP2C9 KCNA5
Intellectual disability, autosomal dominant 52	3e-15	18	Psychiatric Disorder, Nervous System Disease, Genetic, Familial Or Congenital Disease	SLC6A3 DRD3 TACR1 CNR1 CES1 SLC6A4 HTR2A DRD2 MAOB ART1 ...	SLC6A3 DRD3 TACR1 CNR1 CES1 SLC6A4 HTR2A DRD2 MAOB ART1 OPRD1 ADRA2A ILK HTR2C HTR1A GRIN2B PLAU CHRNA4
Mental retardation, autosomal dominant 52	3e-15	18	Psychiatric Disorder, Nervous System Disease, Phenotype, Genetic, Familial Or Congenital Disease	SLC6A3 DRD3 TACR1 CNR1 CES1 SLC6A4 HTR2A DRD2 OPRD1 ADRA2A ...	SLC6A3 DRD3 TACR1 CNR1 CES1 SLC6A4 HTR2A DRD2 OPRD1 ADRA2A ART1 MAOB ILK GRIN2B HTR2C HTR1A PLAU CHRNA4
X-linked intellectual disability - epilepsy	3e-15	14	Psychiatric Disorder, Nervous System Disease, Genetic, Familial Or Congenital Disease	DRD2 HTR2C KDM1A SLC6A3 SLC18A2 ADRA2A ART1 HTR1A OPRD1 CNR1 ...	DRD2 HTR2C KDM1A SLC6A3 SLC18A2 ADRA2A ART1 HTR1A OPRD1 CNR1 SLC6A4 ILK TACR1 DRD3
X-linked non-syndromic intellectual disability	4e-15	24	Psychiatric Disorder, Nervous System Disease, Genetic, Familial Or Congenital Disease	RPS6KA3 DRD3 SLC6A3 HTR1A CES1 NOS2 SLC6A4 HTR2A KDM1A ART1 ...	RPS6KA3 DRD3 SLC6A3 HTR1A CES1 NOS2 SLC6A4 HTR2A KDM1A ART1 MAOA OPRD1 GRIN2B TACR1 CNR1 HTR2C HTR3A SLC18A2 PLAU DRD2 SLC6A2 ADRA2A ILK MAOB
Conduct disorder	7e-15	12	Psychiatric Disorder, Nervous System Disease	DRD2 HTR1A HTR2A DRD3 SLC6A3 SLC6A2 MAOA MAOB TACR1 SLC6A4 ...	DRD2 HTR1A HTR2A DRD3 SLC6A3 SLC6A2 MAOA MAOB TACR1 SLC6A4 CYP2C9 GRIN2B
Intellectual disability, autosomal dominant	2e-14	26	Psychiatric Disorder, Nervous System Disease, Genetic, Familial Or Congenital Disease	GRIN2B SLC6A3 DRD3 CNR1 TACR1 CES1 HTR2C SLC6A4 HTR1A ILK ...	GRIN2B SLC6A3 DRD3 CNR1 TACR1 CES1 HTR2C SLC6A4 HTR1A ILK HTR2A ADRA2A ART1 OPRD1 MAOB DRD2 NOS1 TRPV3 PLAU CHRNA4 OPRM1 CHRNA7 CDC7 KISS1R KIF11 CXCL8
Schizotypal personality disorder	2e-14	6	Psychiatric Disorder	ADRA2C ADRA2A ADRA2B DRD2 HTR2A HTR2C	ADRA2C ADRA2A ADRA2B DRD2 HTR2A HTR2C
Asperger syndrome	5e-14	12	Psychiatric Disorder, Nervous System Disease	SLC6A4 DRD2 HTR2A HTR2C SLC6A2 DRD3 HTR1A MAOA SLC18A2 SLC6A3 ...	SLC6A4 DRD2 HTR2A HTR2C SLC6A2 DRD3 HTR1A MAOA SLC18A2 SLC6A3 GRIN2B CXCL8
Learning disability	6e-14	12	Psychiatric Disorder, Nervous System Disease	DRD3 GRIN2B DRD2 SLC6A3 TACR1 ADRA2C HTR2A MAOA HTR1D RPS6KA3 ...	DRD3 GRIN2B DRD2 SLC6A3 TACR1 ADRA2C HTR2A MAOA HTR1D RPS6KA3 ADRA2A CHRNA4
Autosomal recessive cerebellar ataxia	1e-13	29	Disease Of Visual System, Psychiatric Disorder, Nervous System Disease, Genetic, Familial Or Congenital Disease	SLC6A3 SLC6A4 SLC6A2 PNP PLAU NOS2 CES1 ILK DRD2 NOS1 ...	SLC6A3 SLC6A4 SLC6A2 PNP PLAU NOS2 CES1 ILK DRD2 NOS1 FYN HTR2C ADORA2A CHRNA4 CHRNA7 HTR3A PNMT TRPV3 KISS1R KDM1A CXCL8 CHEK1 CYP3A4 ODC1 MAOB CDK9 CYP2A6 DPP4 CYP2C9
Early-onset ataxia with dementia	1e-13	29	Psychiatric Disorder, Nervous System Disease, Genetic, Familial Or Congenital Disease	SLC6A3 SLC6A4 SLC6A2 PNP PLAU NOS2 CES1 ILK DRD2 NOS1 ...	SLC6A3 SLC6A4 SLC6A2 PNP PLAU NOS2 CES1 ILK DRD2 NOS1 FYN HTR2C ADORA2A CHRNA4 CHRNA7 HTR3A PNMT TRPV3 KISS1R KDM1A CXCL8 CHEK1 CYP3A4 ODC1 MAOB CDK9 CYP2A6 DPP4 CYP2C9
Narcolepsy without cataplexy	1e-13	10	Psychiatric Disorder, Nervous System Disease	TAAR1 DRD2 CXCL8 HTR2A MAOA HTR1A MAOB SLC6A2 SLC18A2 SLC6A3	TAAR1 DRD2 CXCL8 HTR2A MAOA HTR1A MAOB SLC6A2 SLC18A2 SLC6A3
Postpartum depression	1e-13	9	Pregnancy Or Perinatal Disease, Psychiatric Disorder, Nervous System Disease	SLC6A4 GRIN2B DRD2 HTR2A HTR1A HTR2C MAOA OPRM1 CXCL8	SLC6A4 GRIN2B DRD2 HTR2A HTR1A HTR2C MAOA OPRM1 CXCL8
Genetic frontotemporal degeneration with dementia	2e-13	21	Psychiatric Disorder, Nervous System Disease, Genetic, Familial Or Congenital Disease	SLC6A4 GRIN2B MAOB HTR2C DRD2 NOS2 HTR3A PLAU KDM1A MAOA ...	SLC6A4 GRIN2B MAOB HTR2C DRD2 NOS2 HTR3A PLAU KDM1A MAOA SIGMAR1 HTR2A CYP2D6 CDC7 SLC18A2 NOS1 CNR1 HTR1A SLC6A3 CNR2 CXCL8
Autosomal dominant non-syndromic intellectual disability	2e-13	21	Psychiatric Disorder, Nervous System Disease, Genetic, Familial Or Congenital Disease	GRIN2B SLC6A3 DRD3 HTR2C TACR1 CNR1 SLC6A4 CES1 ILK HTR1A ...	GRIN2B SLC6A3 DRD3 HTR2C TACR1 CNR1 SLC6A4 CES1 ILK HTR1A HTR2A DRD2 OPRD1 ART1 ADRA2A MAOB NOS1 TRPV3 PLAU CHRNA4 OPRM1
Fraxe intellectual disability	4e-13	15	Psychiatric Disorder, Nervous System Disease, Genetic, Familial Or Congenital Disease	SLC6A3 DRD3 TACR1 CNR1 CES1 ART1 HTR1A MAOB SLC6A4 ADRA2A ...	SLC6A3 DRD3 TACR1 CNR1 CES1 ART1 HTR1A MAOB SLC6A4 ADRA2A ILK OPRD1 HTR2C GRIN2B OPRM1
Becker muscular dystrophy	5e-13	20	Musculoskeletal Or Connective Tissue Disease, Psychiatric Disorder, Nervous System Disease, Cardiovascular Disease, Respiratory Or Thoracic Disease, Genetic, Familial Or Congenital Disease	ADRB2 ADRA1A ADRB1 ADRA1B CDK9 KISS1R NOS1 CNR2 DPP4 CYP2D6 ...	ADRB2 ADRA1A ADRB1 ADRA1B CDK9 KISS1R NOS1 CNR2 DPP4 CYP2D6 CXCL8 CYP2C9 CNR1 NOS2 CYP2C19 MAOA DRD2 OPRM1 ADRA2A MTAP
Autosomal dominant microcephaly	5e-13	15	Psychiatric Disorder, Nervous System Disease, Genetic, Familial Or Congenital Disease	SLC6A3 DRD3 TACR1 CNR1 CES1 ART1 ADRA2A MAOB OPRD1 HTR1A ...	SLC6A3 DRD3 TACR1 CNR1 CES1 ART1 ADRA2A MAOB OPRD1 HTR1A HTR2C SLC6A4 ILK GRIN2B KIF11
Dysthymic disorder	6e-13	10	Psychiatric Disorder, Nervous System Disease	HTR2A DRD2 SLC6A4 SLC6A3 SLC6A2 DRD3 HTR1A CYP2D6 CXCL8 MAOA	HTR2A DRD2 SLC6A4 SLC6A3 SLC6A2 DRD3 HTR1A CYP2D6 CXCL8 MAOA
Pla2g6-associated neurodegeneration	9e-13	14	Psychiatric Disorder, Nervous System Disease, Nutritional Or Metabolic Disease, Genetic, Familial Or Congenital Disease	SLC6A2 DRD2 SLC18A2 OPRM1 DPP4 CYP2A6 NOS2 PLAU SLC6A3 CYP2C19 ...	SLC6A2 DRD2 SLC18A2 OPRM1 DPP4 CYP2A6 NOS2 PLAU SLC6A3 CYP2C19 ADRB2 MAOA ODC1 GRIN2B
Opioid use disorder	1e-12	6	Psychiatric Disorder	OPRM1 OPRD1 OPRK1 CNR1 DRD2 DRD3	OPRM1 OPRD1 OPRK1 CNR1 DRD2 DRD3
Frontotemporal dementia	2e-12	19	Psychiatric Disorder, Nervous System Disease, Genetic, Familial Or Congenital Disease	SLC6A4 GRIN2B HTR2C DRD2 NOS2 HTR3A PLAU KDM1A MAOA SIGMAR1 ...	SLC6A4 GRIN2B HTR2C DRD2 NOS2 HTR3A PLAU KDM1A MAOA SIGMAR1 CDC7 CYP2D6 NOS1 SLC18A2 CNR2 CNR1 HTR1A CXCL8 SLC6A3
Drug psychosis	2e-12	5	Psychiatric Disorder, Nervous System Disease	HTR2A CNR2 DRD2 SLC6A3 HTR1A	HTR2A CNR2 DRD2 SLC6A3 HTR1A
Dental phobia	3e-12	7	Psychiatric Disorder, Nervous System Disease, Genetic, Familial Or Congenital Disease	ADRA2B ADRB2 ADRA2C ADRA2A ADRB1 CACNA2D1 GRIN2B	ADRA2B ADRB2 ADRA2C ADRA2A ADRB1 CACNA2D1 GRIN2B
Sleepiness	4e-12	9	Psychiatric Disorder, Nervous System Disease	MAOA SLC6A3 HTR1A SLC18A2 DRD2 CXCL8 DRD3 SLC6A4 HTR2A	MAOA SLC6A3 HTR1A SLC18A2 DRD2 CXCL8 DRD3 SLC6A4 HTR2A
Spastic tetraplegia-thin corpus callosum-progressive postnatal microcephaly syndrome	5e-12	14	Psychiatric Disorder, Nervous System Disease, Nutritional Or Metabolic Disease, Genetic, Familial Or Congenital Disease	SLC6A3 DRD3 CNR1 CES1 TACR1 ART1 OPRD1 ADRA2A MAOB SLC6A4 ...	SLC6A3 DRD3 CNR1 CES1 TACR1 ART1 OPRD1 ADRA2A MAOB SLC6A4 HTR1A HTR2C ILK GRIN2B
Intellectual disability - hypotonia - spasticity - sleep disorder	5e-12	14	Psychiatric Disorder, Nervous System Disease, Genetic, Familial Or Congenital Disease	SLC6A3 DRD3 CNR1 TACR1 CES1 ART1 HTR1A ADRA2A OPRD1 MAOB ...	SLC6A3 DRD3 CNR1 TACR1 CES1 ART1 HTR1A ADRA2A OPRD1 MAOB ILK GRIN2B SLC6A4 HTR2C
Infantile neuroaxonal dystrophy	5e-12	13	Psychiatric Disorder, Nervous System Disease, Nutritional Or Metabolic Disease, Genetic, Familial Or Congenital Disease	SLC6A2 OPRM1 DPP4 CYP2A6 NOS2 PLAU CYP2C19 ADRB2 MAOA ODC1 ...	SLC6A2 OPRM1 DPP4 CYP2A6 NOS2 PLAU CYP2C19 ADRB2 MAOA ODC1 GRIN2B DRD2 SLC6A3
Duchenne muscular dystrophy	3e-11	17	Disease Of Visual System, Musculoskeletal Or Connective Tissue Disease, Psychiatric Disorder, Nervous System Disease, Cardiovascular Disease, Respiratory Or Thoracic Disease, Genetic, Familial Or Congenital Disease	ADRB2 ADRA1B ADRB1 ADRA1A ADORA2A ADORA2B NOS1 DPP4 NOS2 MAOB ...	ADRB2 ADRA1B ADRB1 ADRA1A ADORA2A ADORA2B NOS1 DPP4 NOS2 MAOB CACNA2D1 HTR2B CNR1 PABPC1 MAOA S1PR3 CXCL8
Neurodegeneration with brain iron accumulation	5e-11	15	Psychiatric Disorder, Nervous System Disease, Nutritional Or Metabolic Disease, Genetic, Familial Or Congenital Disease	SLC6A2 DRD2 GRIN2B SLC18A2 ADRA1B OPRM1 DPP4 CYP2A6 NOS2 SLC6A3 ...	SLC6A2 DRD2 GRIN2B SLC18A2 ADRA1B OPRM1 DPP4 CYP2A6 NOS2 SLC6A3 PLAU CYP2C19 ADRB2 MAOA ODC1
Aids dementia	1e-10	8	Infectious Disease, Psychiatric Disorder, Nervous System Disease	NOS2 TACR1 CNR1 CNR2 PLAU NOS1 OPRM1 CXCL8	NOS2 TACR1 CNR1 CNR2 PLAU NOS1 OPRM1 CXCL8
X-linked dominant intellectual disability - epilepsy syndrome	4e-10	9	Psychiatric Disorder, Nervous System Disease, Genetic, Familial Or Congenital Disease	SLC6A3 ART1 ILK CNR1 OPRD1 DRD3 SLC6A4 HTR1A TACR1	SLC6A3 ART1 ILK CNR1 OPRD1 DRD3 SLC6A4 HTR1A TACR1
Alcoholic liver cirrhosis	1e-09	9	Cell Proliferation Disorder, Endocrine System Disease, Psychiatric Disorder, Gastrointestinal Disease	ADRB1 ADRB2 CXCL8 NOS2 CYP2A6 UGT2B7 CYP3A4 CYP2C19 AOC3	ADRB1 ADRB2 CXCL8 NOS2 CYP2A6 UGT2B7 CYP3A4 CYP2C19 AOC3
Dyslexia	3e-09	7	Psychiatric Disorder, Nervous System Disease	DRD3 DRD2 GRIN2B SLC6A3 TACR1 MAOA ADRA2A	DRD3 DRD2 GRIN2B SLC6A3 TACR1 MAOA ADRA2A
Reading disorder	3e-09	7	Psychiatric Disorder, Nervous System Disease	DRD3 DRD2 GRIN2B SLC6A3 TACR1 ADRA2A MAOA	DRD3 DRD2 GRIN2B SLC6A3 TACR1 ADRA2A MAOA
Melancholia	7e-09	5	Psychiatric Disorder, Nervous System Disease	SLC6A4 SLC6A2 HTR2A CNR1 DRD2	SLC6A4 SLC6A2 HTR2A CNR1 DRD2
Fragile x syndrome	1e-08	11	Disease Of Visual System, Endocrine System Disease, Musculoskeletal Or Connective Tissue Disease, Psychiatric Disorder, Nervous System Disease, Nutritional Or Metabolic Disease, Genetic, Familial Or Congenital Disease	GRIN2B CNR1 HTR2A DRD2 HTR1A SLC6A4 NOS2 MAOA SLC18A2 NOS1 ...	GRIN2B CNR1 HTR2A DRD2 HTR1A SLC6A4 NOS2 MAOA SLC18A2 NOS1 OPRM1
Posterior cortical atrophy	1e-08	10	Psychiatric Disorder, Nervous System Disease, Genetic, Familial Or Congenital Disease	HTR3A NOS2 PLAU NOS1 CXCL8 OPRM1 CYP3A4 TAAR1 ODC1 S1PR1	HTR3A NOS2 PLAU NOS1 CXCL8 OPRM1 CYP3A4 TAAR1 ODC1 S1PR1
Lewy body dementia	4e-08	8	Psychiatric Disorder, Nervous System Disease	HTR2A SLC18A2 DRD2 CYP2D6 NOS2 NOS1 DPP7 MAOB	HTR2A SLC18A2 DRD2 CYP2D6 NOS2 NOS1 DPP7 MAOB
Syndromic neurometabolic disease with x-linked intellectual disability	2e-07	17	Psychiatric Disorder, Nervous System Disease, Genetic, Familial Or Congenital Disease	MAOA NOS1 PLAU HTR3A ADRA2A CES1 NOS2 CHRNA4 SLC18A2 SLC6A2 ...	MAOA NOS1 PLAU HTR3A ADRA2A CES1 NOS2 CHRNA4 SLC18A2 SLC6A2 KDM1A DRD2 ADRA2B SLC7A5 CYP3A4 SLC22A6 NUDT1
Intellectual disability, autosomal dominant 45	4e-07	6	Psychiatric Disorder, Nervous System Disease, Genetic, Familial Or Congenital Disease	SLC6A3 HTR1A TACR1 CNR1 ILK SLC6A4	SLC6A3 HTR1A TACR1 CNR1 ILK SLC6A4
Neurodevelopmental disorder with epilepsy, cataracts, feeding difficulties, and delayed brain myelination	6e-07	7	Disease Of Visual System, Psychiatric Disorder, Nervous System Disease, Genetic, Familial Or Congenital Disease	DRD3 MAOA FYN SLC18A2 SLC6A4 SLC6A3 DRD2	DRD3 MAOA FYN SLC18A2 SLC6A4 SLC6A3 DRD2
Primary microcephaly-mild intellectual disability-young-onset diabetes syndrome	7e-07	7	Pancreas Disease, Endocrine System Disease, Psychiatric Disorder, Nervous System Disease, Nutritional Or Metabolic Disease, Genetic, Familial Or Congenital Disease	ADRA1B ADRA2A OPRM1 HTR2C DPP4 CES1 RPS6KA3	ADRA1B ADRA2A OPRM1 HTR2C DPP4 CES1 RPS6KA3
Bardet-biedl syndrome	9e-07	14	Urinary System Disease, Reproductive System Or Breast Disease, Disease Of Visual System, Endocrine System Disease, Musculoskeletal Or Connective Tissue Disease, Psychiatric Disorder, Gastrointestinal Disease, Nervous System Disease, Nutritional Or Metabolic Disease, Genetic, Familial Or Congenital Disease	CES1 HTR2B OPRM1 KISS1R NOS2 CHRNA7 DRD2 DPP4 ILK FYN ...	CES1 HTR2B OPRM1 KISS1R NOS2 CHRNA7 DRD2 DPP4 ILK FYN SLC18A2 SLC6A4 HTR2C DRD3
Huntington disease-like syndrome	1e-06	9	Psychiatric Disorder, Nervous System Disease, Genetic, Familial Or Congenital Disease	DRD2 SLC18A2 HTR3A CHRNA4 CXCL8 KCNA5 HTR1A SLC6A3 PNMT	DRD2 SLC18A2 HTR3A CHRNA4 CXCL8 KCNA5 HTR1A SLC6A3 PNMT
X-linked adrenoleukodystrophy	1e-06	8	Urinary System Disease, Reproductive System Or Breast Disease, Endocrine System Disease, Psychiatric Disorder, Nervous System Disease, Nutritional Or Metabolic Disease, Genetic, Familial Or Congenital Disease	HTR3A CXCL8 CNR1 NOS2 CNR2 DPP4 CES1 S1PR1	HTR3A CXCL8 CNR1 NOS2 CNR2 DPP4 CES1 S1PR1
Autosomal recessive cerebellar ataxia due to a dna repair defect	2e-06	13	Disease Of Visual System, Psychiatric Disorder, Nervous System Disease, Nutritional Or Metabolic Disease, Genetic, Familial Or Congenital Disease	PNP NOS2 TRPV3 KISS1R CES1 PLAU CXCL8 CHEK1 DRD2 ODC1 ...	PNP NOS2 TRPV3 KISS1R CES1 PLAU CXCL8 CHEK1 DRD2 ODC1 MAOB CDK9 CYP2A6
Progressive supranuclear palsy	2e-06	10	Disease Of Visual System, Psychiatric Disorder, Nervous System Disease, Genetic, Familial Or Congenital Disease	MAOB DRD2 NOS2 HTR2A SLC18A2 CYP2D6 CNR1 NOS1 HTR1A SLC6A3	MAOB DRD2 NOS2 HTR2A SLC18A2 CYP2D6 CNR1 NOS1 HTR1A SLC6A3
Rolandic epilepsy - speech dyspraxia	2e-06	5	Psychiatric Disorder, Nervous System Disease, Genetic, Familial Or Congenital Disease	SLC6A3 ILK HTR1A SLC6A4 CNR1	SLC6A3 ILK HTR1A SLC6A4 CNR1
Cerebral lipidosis with dementia	3e-06	11	Psychiatric Disorder, Nervous System Disease, Nutritional Or Metabolic Disease, Genetic, Familial Or Congenital Disease	ADRA2B HTR3A HTR2C KDM1A CXCL8 CYP3A4 NOS2 CYP2D6 NOS1 DRD2 ...	ADRA2B HTR3A HTR2C KDM1A CXCL8 CYP3A4 NOS2 CYP2D6 NOS1 DRD2 CYP2C9
Communication disorder	3e-06	7	Psychiatric Disorder, Nervous System Disease	DRD2 CHRNA7 HTR4 GRIN2B SLC6A3 ADRB1 CYP2C19	DRD2 CHRNA7 HTR4 GRIN2B SLC6A3 ADRB1 CYP2C19
15q11q13 microduplication syndrome	3e-06	6	Psychiatric Disorder, Nervous System Disease, Genetic, Familial Or Congenital Disease	DRD3 MAOA SLC18A2 SLC6A4 SLC6A3 DRD2	DRD3 MAOA SLC18A2 SLC6A4 SLC6A3 DRD2
Developmental delay and seizures with or without movement abnormalities	4e-06	5	Psychiatric Disorder, Nervous System Disease	DRD2 HTR2C SLC18A2 KDM1A ADRA2A	DRD2 HTR2C SLC18A2 KDM1A ADRA2A
Separation anxiety disorder	4e-06	3	Psychiatric Disorder, Nervous System Disease	HTR1A SLC6A4 OPRM1	HTR1A SLC6A4 OPRM1
Prader-willi syndrome	5e-06	7	Urinary System Disease, Reproductive System Or Breast Disease, Endocrine System Disease, Psychiatric Disorder, Nervous System Disease, Nutritional Or Metabolic Disease, Genetic, Familial Or Congenital Disease	CNR1 HTR2C DRD2 NOS2 ADRB1 METAP2 MAOB	CNR1 HTR2C DRD2 NOS2 ADRB1 METAP2 MAOB
Bipolar ii disorder	6e-06	3	Psychiatric Disorder, Nervous System Disease	DRD3 DRD2 CXCL8	DRD3 DRD2 CXCL8
Narcolepsy with cataplexy	7e-06	4	Psychiatric Disorder, Nervous System Disease	SLC6A3 SLC18A2 SLC6A2 MAOA	SLC6A3 SLC18A2 SLC6A2 MAOA
Autosomal recessive metabolic cerebellar ataxia	9e-06	8	Disease Of Visual System, Psychiatric Disorder, Nervous System Disease, Genetic, Familial Or Congenital Disease	FYN CXCL8 CYP3A4 NOS2 NOS1 DPP4 HTR3A CYP2C9	FYN CXCL8 CYP3A4 NOS2 NOS1 DPP4 HTR3A CYP2C9
Aicardi-goutières syndrome	1e-05	8	Immune System Disease, Musculoskeletal Or Connective Tissue Disease, Psychiatric Disorder, Nervous System Disease, Genetic, Familial Or Congenital Disease	TRPV3 MTAP CYP3A4 KISS1R CHRNA7 CDC7 PLAU CXCL8	TRPV3 MTAP CYP3A4 KISS1R CHRNA7 CDC7 PLAU CXCL8
Alcoholic psychosis	1e-05	2	Psychiatric Disorder, Nervous System Disease	DRD2 SLC6A4	DRD2 SLC6A4
Lissencephaly	2e-05	15	Psychiatric Disorder, Nervous System Disease, Genetic, Familial Or Congenital Disease	DRD2 NOS1 PLAU KDM1A ADRA2A ANPEP RPS6KA3 SLC7A5 NOS2 CXCL8 ...	DRD2 NOS1 PLAU KDM1A ADRA2A ANPEP RPS6KA3 SLC7A5 NOS2 CXCL8 LCK DPP4 ODC1 FYN MAOB
West syndrome	3e-05	6	Psychiatric Disorder, Nervous System Disease, Genetic, Familial Or Congenital Disease	GRIN2B CNR1 HTR2C KDM1A CXCL8 CACNA2D1	GRIN2B CNR1 HTR2C KDM1A CXCL8 CACNA2D1
Cerebrotendinous xanthomatosis	3e-05	6	Pregnancy Or Perinatal Disease, Disease Of Visual System, Integumentary System Disease, Endocrine System Disease, Psychiatric Disorder, Gastrointestinal Disease, Nervous System Disease, Nutritional Or Metabolic Disease, Genetic, Familial Or Congenital Disease	CXCL8 CYP3A4 NOS2 NOS1 HTR3A CYP2C9	CXCL8 CYP3A4 NOS2 NOS1 HTR3A CYP2C9
Enuresis	3e-05	3	Psychiatric Disorder	SLC6A2 HTR2A NOS1	SLC6A2 HTR2A NOS1
Genetic cerebrovascular dementia	4e-05	7	Psychiatric Disorder, Nervous System Disease, Cardiovascular Disease, Genetic, Familial Or Congenital Disease	CXCL8 AOC3 KCNA5 CYP2C9 ADRB1 GRIN2B CYP3A4	CXCL8 AOC3 KCNA5 CYP2C9 ADRB1 GRIN2B CYP3A4
X-linked intellectual disability, hedera type	4e-05	4	Psychiatric Disorder, Nervous System Disease, Genetic, Familial Or Congenital Disease	DRD2 HTR2C SLC18A2 KDM1A	DRD2 HTR2C SLC18A2 KDM1A
Atp6ap2-related disorder	4e-05	4	Psychiatric Disorder, Nervous System Disease, Genetic, Familial Or Congenital Disease	DRD2 SLC18A2 HTR2C KDM1A	DRD2 SLC18A2 HTR2C KDM1A
Metachromatic leukodystrophy	6e-05	5	Disease Of Visual System, Musculoskeletal Or Connective Tissue Disease, Psychiatric Disorder, Nervous System Disease, Nutritional Or Metabolic Disease, Genetic, Familial Or Congenital Disease	HTR3A ADRA1A CDK9 NOS2 CXCL8	HTR3A ADRA1A CDK9 NOS2 CXCL8
Pervasive developmental disorder - not otherwise specified	6e-05	4	Psychiatric Disorder, Nervous System Disease	SLC18A2 SLC6A4 CXCL8 MAOA	SLC18A2 SLC6A4 CXCL8 MAOA
Pick disease	0.0001	11	Psychiatric Disorder, Nervous System Disease, Genetic, Familial Or Congenital Disease	GRIN2B HTR2C NOS2 DRD2 SIGMAR1 CDC7 SLC6A4 NOS1 HTR1A CACNA2D1 ...	GRIN2B HTR2C NOS2 DRD2 SIGMAR1 CDC7 SLC6A4 NOS1 HTR1A CACNA2D1 S1PR3
Cerebral amyloid angiopathy	0.0001	6	Psychiatric Disorder, Nervous System Disease, Cardiovascular Disease, Nutritional Or Metabolic Disease, Genetic, Familial Or Congenital Disease	CXCL8 AOC3 CYP2C9 ADRB1 CYP3A4 GRIN2B	CXCL8 AOC3 CYP2C9 ADRB1 CYP3A4 GRIN2B
Neuroacanthocytosis	0.0001	5	Psychiatric Disorder, Nervous System Disease, Genetic, Familial Or Congenital Disease	DRD2 SLC18A2 CXCL8 KCNA5 PNMT	DRD2 SLC18A2 CXCL8 KCNA5 PNMT
Familial alzheimer disease	0.0001	4	Psychiatric Disorder, Nervous System Disease	KDM1A GRIN2B NOS1 NOS2	KDM1A GRIN2B NOS1 NOS2
X-linked intellectual disability, cantagrel type	0.0001	3	Psychiatric Disorder, Nervous System Disease, Genetic, Familial Or Congenital Disease	KDM1A HTR3A ADRA2A	KDM1A HTR3A ADRA2A
Adult-onset dystonia-parkinsonism	0.0001	3	Psychiatric Disorder, Nervous System Disease, Nutritional Or Metabolic Disease, Genetic, Familial Or Congenital Disease	DRD2 SLC18A2 SLC6A3	DRD2 SLC18A2 SLC6A3
Joubert syndrome and related disorders	0.0002	7	Disease Of Visual System, Psychiatric Disorder, Nervous System Disease, Genetic, Familial Or Congenital Disease	ILK CES1 NOS1 DRD2 PLAU SLC6A3 NOS2	ILK CES1 NOS1 DRD2 PLAU SLC6A3 NOS2
Pelizaeus-merzbacher disease	0.0002	4	Disease Of Visual System, Psychiatric Disorder, Nervous System Disease, Genetic, Familial Or Congenital Disease	NOS2 HTR1A HTR2A CXCL8	NOS2 HTR1A HTR2A CXCL8
Agoraphobia	0.0002	4	Psychiatric Disorder, Nervous System Disease	SLC6A4 HTR1A ADORA2A MAOA	SLC6A4 HTR1A ADORA2A MAOA
Acute stress reaction	0.0002	4	Psychiatric Disorder, Nervous System Disease	ADRA1A ADRA1B CYP2C9 HTR4	ADRA1A ADRA1B CYP2C9 HTR4
Spinocerebellar ataxia type 3	0.0002	4	Disease Of Visual System, Psychiatric Disorder, Nervous System Disease, Genetic, Familial Or Congenital Disease	DRD2 CHRNA4 SLC18A2 HTR1A	DRD2 CHRNA4 SLC18A2 HTR1A
Delusional disorder	0.0002	2	Psychiatric Disorder, Nervous System Disease	DRD2 DRD3	DRD2 DRD3
Classic lissencephaly	0.0003	7	Psychiatric Disorder, Nervous System Disease, Genetic, Familial Or Congenital Disease	DRD2 ANPEP SLC7A5 DPP4 CXCL8 MAOB KDM1A	DRD2 ANPEP SLC7A5 DPP4 CXCL8 MAOB KDM1A
Menkes disease	0.0003	5	Disease Of Visual System, Integumentary System Disease, Psychiatric Disorder, Nervous System Disease, Nutritional Or Metabolic Disease, Genetic, Familial Or Congenital Disease	DRD2 SLC6A2 SLC18A2 CHRNA4 CES1	DRD2 SLC6A2 SLC18A2 CHRNA4 CES1
Macrocephaly-developmental delay syndrome	0.0003	4	Psychiatric Disorder, Nervous System Disease, Genetic, Familial Or Congenital Disease	SLC18A2 DRD3 SLC6A4 SLC6A3	SLC18A2 DRD3 SLC6A4 SLC6A3
Norrie disease	0.0003	3	Disease Of Visual System, Musculoskeletal Or Connective Tissue Disease, Psychiatric Disorder, Nervous System Disease, Genetic, Familial Or Congenital Disease	MAOA MAOB KIF11	MAOA MAOB KIF11
Miller-dieker syndrome	0.0004	6	Psychiatric Disorder, Nervous System Disease, Genetic, Familial Or Congenital Disease	ANPEP SLC7A5 DPP4 CXCL8 KDM1A MAOB	ANPEP SLC7A5 DPP4 CXCL8 KDM1A MAOB
Hypersomnia	0.0004	5	Psychiatric Disorder, Nervous System Disease	SLC6A3 HTR2C NOS2 DRD2 CYP2D6	SLC6A3 HTR2C NOS2 DRD2 CYP2D6
Coffin-siris syndrome	0.0005	5	Musculoskeletal Or Connective Tissue Disease, Psychiatric Disorder, Nervous System Disease, Genetic, Familial Or Congenital Disease	KISS1R S1PR1 CXCL8 NOS2 DPP4	KISS1R S1PR1 CXCL8 NOS2 DPP4
Periventricular nodular heterotopia	0.0006	5	Psychiatric Disorder, Nervous System Disease, Genetic, Familial Or Congenital Disease	DRD2 FYN MAOB CNR1 ILK	DRD2 FYN MAOB CNR1 ILK
Nodular neuronal heterotopia	0.0006	5	Psychiatric Disorder, Nervous System Disease, Genetic, Familial Or Congenital Disease	DRD2 FYN MAOB CNR1 ILK	DRD2 FYN MAOB CNR1 ILK
Pachygyria - intellectual disability - epilepsy	0.0006	3	Psychiatric Disorder, Nervous System Disease, Genetic, Familial Or Congenital Disease	HTR2C KDM1A ADRA2A	HTR2C KDM1A ADRA2A
X-linked intellectual disability - macrocephaly - macroorchidism	0.0006	2	Psychiatric Disorder, Nervous System Disease, Genetic, Familial Or Congenital Disease	CYP2C9 CYP2D6	CYP2C9 CYP2D6
Autosomal recessive congenital cerebellar ataxia	0.0007	8	Disease Of Visual System, Psychiatric Disorder, Nervous System Disease, Genetic, Familial Or Congenital Disease	ILK CES1 DRD2 NOS1 PLAU SLC6A3 CHRNA7 NOS2	ILK CES1 DRD2 NOS1 PLAU SLC6A3 CHRNA7 NOS2
Language disorder	0.0007	4	Psychiatric Disorder, Nervous System Disease	CHRNA7 GRIN2B SLC6A3 CYP2C19	CHRNA7 GRIN2B SLC6A3 CYP2C19
Female restricted epilepsy with intellectual disability	0.0007	3	Psychiatric Disorder, Nervous System Disease, Genetic, Familial Or Congenital Disease	HTR2C KDM1A ADRA2A	HTR2C KDM1A ADRA2A
Syndromic neurometabolic disease with non-x-linked intellectual disability	0.0009	13	Psychiatric Disorder, Nervous System Disease, Genetic, Familial Or Congenital Disease	PLAU NOS1 KISS1R SLC18A2 HTR2C SLC6A4 TRPV3 KDM1A CHRNA7 NOS2 ...	PLAU NOS1 KISS1R SLC18A2 HTR2C SLC6A4 TRPV3 KDM1A CHRNA7 NOS2 HTR3A DRD2 CYP3A4
Intellectual disability-severe speech delay-mild dysmorphism syndrome	0.0009	5	Psychiatric Disorder, Nervous System Disease, Genetic, Familial Or Congenital Disease	SLC18A2 CES1 SLC6A3 DRD3 SLC6A4	SLC18A2 CES1 SLC6A3 DRD3 SLC6A4
Ataxia-telangiectasia	0.001	13	Urinary System Disease, Reproductive System Or Breast Disease, Disease Of Visual System, Integumentary System Disease, Immune System Disease, Endocrine System Disease, Psychiatric Disorder, Nervous System Disease, Cardiovascular Disease, Nutritional Or Metabolic Disease, Genetic, Familial Or Congenital Disease	CHRNA4 GRIN2B CNR1 SLC18A2 CXCL8 CHEK1 DRD2 CES1 ODC1 KDM1A ...	CHRNA4 GRIN2B CNR1 SLC18A2 CXCL8 CHEK1 DRD2 CES1 ODC1 KDM1A CDK9 OPRK1 HTR4
Non-x-linked congenital disorder of glycosylation with intellectual disability as a major feature	0.001	12	Psychiatric Disorder, Nervous System Disease, Nutritional Or Metabolic Disease, Genetic, Familial Or Congenital Disease	PLAU NOS1 KISS1R HTR2C SLC18A2 SLC6A4 TRPV3 KDM1A NOS2 HTR3A ...	PLAU NOS1 KISS1R HTR2C SLC18A2 SLC6A4 TRPV3 KDM1A NOS2 HTR3A DRD2 CYP3A4
Lissencephaly type 3	0.001	9	Psychiatric Disorder, Nervous System Disease, Genetic, Familial Or Congenital Disease	DRD2 KDM1A RPS6KA3 ANPEP NOS1 NOS2 LCK ODC1 FYN	DRD2 KDM1A RPS6KA3 ANPEP NOS1 NOS2 LCK ODC1 FYN
Language impairment	0.001	3	Psychiatric Disorder, Nervous System Disease, Genetic, Familial Or Congenital Disease	CHRNA7 GRIN2B SLC6A3	CHRNA7 GRIN2B SLC6A3
Specific language impairment	0.001	3	Psychiatric Disorder, Nervous System Disease, Genetic, Familial Or Congenital Disease	CHRNA7 GRIN2B SLC6A3	CHRNA7 GRIN2B SLC6A3
Beta-propeller protein-associated neurodegeneration	0.001	3	Psychiatric Disorder, Nervous System Disease, Nutritional Or Metabolic Disease, Genetic, Familial Or Congenital Disease	DRD2 SLC18A2 ADRA1B	DRD2 SLC18A2 ADRA1B
Neu-laxova syndrome	0.002	8	Integumentary System Disease, Psychiatric Disorder, Nervous System Disease, Nutritional Or Metabolic Disease, Genetic, Familial Or Congenital Disease	KDM1A RPS6KA3 ANPEP NOS1 NOS2 LCK ODC1 FYN	KDM1A RPS6KA3 ANPEP NOS1 NOS2 LCK ODC1 FYN
Friedreich ataxia	0.002	6	Disease Of Visual System, Musculoskeletal Or Connective Tissue Disease, Psychiatric Disorder, Nervous System Disease, Cardiovascular Disease, Respiratory Or Thoracic Disease, Genetic, Familial Or Congenital Disease	SLC6A4 SLC6A2 SLC6A3 CHRNA4 KIF11 MAOA	SLC6A4 SLC6A2 SLC6A3 CHRNA4 KIF11 MAOA
Alopecia-intellectual disability syndrome	0.002	3	Integumentary System Disease, Psychiatric Disorder, Nervous System Disease, Genetic, Familial Or Congenital Disease	CNR2 EBP TRPV3	CNR2 EBP TRPV3
Lissencephaly 10	0.002	2	Psychiatric Disorder, Nervous System Disease, Genetic, Familial Or Congenital Disease	KDM1A ADRA2A	KDM1A ADRA2A
Spastic ataxia - corneal dystrophy	0.002	1	Disease Of Visual System, Integumentary System Disease, Psychiatric Disorder, Nervous System Disease, Genetic, Familial Or Congenital Disease	ADORA2A	ADORA2A
Flying phobia	0.002	1	Psychiatric Disorder, Nervous System Disease, Genetic, Familial Or Congenital Disease	ADRB1	ADRB1
Coasy protein-associated neurodegeneration	0.003	2	Psychiatric Disorder, Nervous System Disease, Nutritional Or Metabolic Disease, Genetic, Familial Or Congenital Disease	DRD2 SLC18A2	DRD2 SLC18A2
X-linked parkinsonism-spasticity syndrome	0.003	2	Psychiatric Disorder, Nervous System Disease, Genetic, Familial Or Congenital Disease	DRD2 SLC18A2	DRD2 SLC18A2
Microduplication xp11.22-p11.23 syndrome	0.003	2	Psychiatric Disorder, Nervous System Disease, Genetic, Familial Or Congenital Disease	KDM1A ADRA2A	KDM1A ADRA2A
Late-onset ataxia with dementia	0.004	7	Psychiatric Disorder, Nervous System Disease, Genetic, Familial Or Congenital Disease	DRD2 HTR3A SLC18A2 CHRNA7 CHRNA4 HTR1A KCNA5	DRD2 HTR3A SLC18A2 CHRNA7 CHRNA4 HTR1A KCNA5
Autosomal dominant cerebellar ataxia	0.004	7	Disease Of Visual System, Psychiatric Disorder, Nervous System Disease, Genetic, Familial Or Congenital Disease	DRD2 HTR3A SLC18A2 CHRNA7 CHRNA4 HTR1A KCNA5	DRD2 HTR3A SLC18A2 CHRNA7 CHRNA4 HTR1A KCNA5
Autosomal recessive degenerative and progressive cerebellar ataxia	0.004	5	Disease Of Visual System, Psychiatric Disorder, Nervous System Disease, Genetic, Familial Or Congenital Disease	SLC6A4 SLC6A2 SLC6A3 CHRNA4 HTR3A	SLC6A4 SLC6A2 SLC6A3 CHRNA4 HTR3A
Behavioral variant of frontotemporal dementia	0.004	4	Psychiatric Disorder, Nervous System Disease, Genetic, Familial Or Congenital Disease	HTR2C DRD2 NOS2 HTR3A	HTR2C DRD2 NOS2 HTR3A
Bilateral striopallidodentate calcinosis	0.004	3	Psychiatric Disorder, Nervous System Disease, Nutritional Or Metabolic Disease, Genetic, Familial Or Congenital Disease	DRD2 SLC18A2 HTR3A	DRD2 SLC18A2 HTR3A
Kleine-levin syndrome	0.004	3	Psychiatric Disorder, Nervous System Disease	HTR2C NOS2 DRD2	HTR2C NOS2 DRD2
Circadian rhythm sleep disorder	0.004	2	Psychiatric Disorder, Nervous System Disease	ADRB1 HTR2A	ADRB1 HTR2A
Alcohol and nicotine codependence	0.004	1	Psychiatric Disorder, Nervous System Disease	HTR1A	HTR1A
Panic disorder with agoraphobia	0.004	1	Psychiatric Disorder, Nervous System Disease	HTR1A	HTR1A
Periodic limb movement disorder	0.004	1	Psychiatric Disorder, Nervous System Disease	DRD2	DRD2
Isolated nadh-coq reductase deficiency	0.005	7	Musculoskeletal Or Connective Tissue Disease, Psychiatric Disorder, Nervous System Disease, Nutritional Or Metabolic Disease, Genetic, Familial Or Congenital Disease	NOS1 PLAU NOS2 KDM1A HTR3A ADRA2B CES1	NOS1 PLAU NOS2 KDM1A HTR3A ADRA2B CES1
Autosomal dominant cerebellar ataxia type 1	0.005	6	Disease Of Visual System, Psychiatric Disorder, Nervous System Disease, Genetic, Familial Or Congenital Disease	DRD2 SLC18A2 HTR3A CHRNA7 CHRNA4 HTR1A	DRD2 SLC18A2 HTR3A CHRNA7 CHRNA4 HTR1A
Pyruvate dehydrogenase deficiency	0.005	5	Psychiatric Disorder, Nervous System Disease, Nutritional Or Metabolic Disease, Genetic, Familial Or Congenital Disease	NOS1 ADRA2A SLC7A5 CYP3A4 NUDT1	NOS1 ADRA2A SLC7A5 CYP3A4 NUDT1
Dyskeratosis congenita	0.005	4	Hematologic Disease, Disease Of Visual System, Integumentary System Disease, Cell Proliferation Disorder, Immune System Disease, Psychiatric Disorder, Nervous System Disease, Genetic, Familial Or Congenital Disease	DPP4 HTR3A EBP CNR2	DPP4 HTR3A EBP CNR2
Recurrent hypersomnia	0.005	3	Psychiatric Disorder, Nervous System Disease	HTR2C NOS2 DRD2	HTR2C NOS2 DRD2
Prader-willi syndrome due to point mutation	0.005	3	Urinary System Disease, Reproductive System Or Breast Disease, Endocrine System Disease, Psychiatric Disorder, Nervous System Disease, Nutritional Or Metabolic Disease, Genetic, Familial Or Congenital Disease	HTR2C NOS2 DRD2	HTR2C NOS2 DRD2
Silver-russell syndrome	0.005	3	Psychiatric Disorder, Nervous System Disease, Genetic, Familial Or Congenital Disease	HTR3A GRIN2B ODC1	HTR3A GRIN2B ODC1
Bardet-biedl syndrome 12	0.006	4	Urinary System Disease, Reproductive System Or Breast Disease, Disease Of Visual System, Endocrine System Disease, Musculoskeletal Or Connective Tissue Disease, Psychiatric Disorder, Gastrointestinal Disease, Nervous System Disease, Nutritional Or Metabolic Disease, Genetic, Familial Or Congenital Disease	KISS1R CES1 OPRM1 NOS2	KISS1R CES1 OPRM1 NOS2
Ear-patella-short stature syndrome	0.006	3	Musculoskeletal Or Connective Tissue Disease, Psychiatric Disorder, Nervous System Disease, Genetic, Familial Or Congenital Disease	KISS1R ILK HTR3A	KISS1R ILK HTR3A
Microcephalic osteodysplastic dysplasia, saul-wilson type	0.006	3	Musculoskeletal Or Connective Tissue Disease, Psychiatric Disorder, Nervous System Disease, Genetic, Familial Or Congenital Disease	CDC7 KISS1R CHRNA7	CDC7 KISS1R CHRNA7
Spinocerebellar ataxia type 17	0.006	3	Disease Of Visual System, Psychiatric Disorder, Nervous System Disease, Genetic, Familial Or Congenital Disease	DRD2 HTR3A SLC18A2	DRD2 HTR3A SLC18A2
Posterior column ataxia - retinitis pigmentosa	0.006	2	Disease Of Visual System, Psychiatric Disorder, Nervous System Disease, Genetic, Familial Or Congenital Disease	SLC6A4 HTR3A	SLC6A4 HTR3A
Riddle syndrome	0.006	2	Disease Of Visual System, Psychiatric Disorder, Nervous System Disease, Nutritional Or Metabolic Disease, Genetic, Familial Or Congenital Disease	TRPV3 PLAU	TRPV3 PLAU
Machado-joseph disease	0.006	2	Disease Of Visual System, Psychiatric Disorder, Nervous System Disease, Genetic, Familial Or Congenital Disease	DRD2 SLC18A2	DRD2 SLC18A2
Blood-injection-injury phobia	0.006	1	Psychiatric Disorder, Nervous System Disease, Genetic, Familial Or Congenital Disease	ADORA2A	ADORA2A
Post-concussion syndrome	0.006	1	Psychiatric Disorder, Nervous System Disease	HTR1A	HTR1A
Simpson-golabi-behmel syndrome	0.007	4	Urinary System Disease, Musculoskeletal Or Connective Tissue Disease, Psychiatric Disorder, Nervous System Disease, Respiratory Or Thoracic Disease, Genetic, Familial Or Congenital Disease	DPP4 CES1 CXCL8 CNR1	DPP4 CES1 CXCL8 CNR1
Hepatitis, alcoholic	0.007	3	Endocrine System Disease, Psychiatric Disorder, Gastrointestinal Disease	ADORA2A ADORA2B CXCL8	ADORA2A ADORA2B CXCL8
Atypical rett syndrome	0.007	2	Psychiatric Disorder, Nervous System Disease, Genetic, Familial Or Congenital Disease	SLC18A2 GRIN2B	SLC18A2 GRIN2B
Early-onset spastic ataxia-neuropathy syndrome	0.007	2	Disease Of Visual System, Musculoskeletal Or Connective Tissue Disease, Psychiatric Disorder, Gastrointestinal Disease, Nervous System Disease, Nutritional Or Metabolic Disease, Genetic, Familial Or Congenital Disease	HTR2C KDM1A	HTR2C KDM1A
Noonan syndrome	0.008	4	Urinary System Disease, Hematologic Disease, Reproductive System Or Breast Disease, Disease Of Visual System, Integumentary System Disease, Immune System Disease, Endocrine System Disease, Musculoskeletal Or Connective Tissue Disease, Psychiatric Disorder, Nervous System Disease, Cardiovascular Disease, Respiratory Or Thoracic Disease, Genetic, Familial Or Congenital Disease	TRPV3 PLAU NOS1 GRIN2B	TRPV3 PLAU NOS1 GRIN2B
Semantic dementia	0.008	3	Psychiatric Disorder, Nervous System Disease, Genetic, Familial Or Congenital Disease	HTR2C NOS2 DRD2	HTR2C NOS2 DRD2
Grn-related frontotemporal lobar degeneration with tdp43 inclusions	0.008	3	Psychiatric Disorder, Nervous System Disease, Genetic, Familial Or Congenital Disease	HTR2C NOS2 DRD2	HTR2C NOS2 DRD2
Progressive non-fluent aphasia	0.008	3	Psychiatric Disorder, Nervous System Disease, Genetic, Familial Or Congenital Disease	HTR2C NOS2 DRD2	HTR2C NOS2 DRD2
Speech disorder	0.008	3	Psychiatric Disorder, Nervous System Disease	ADRB1 GRIN2B CYP2C19	ADRB1 GRIN2B CYP2C19
Choreoacanthocytosis	0.008	2	Integumentary System Disease, Psychiatric Disorder, Nervous System Disease, Nutritional Or Metabolic Disease, Genetic, Familial Or Congenital Disease	KCNA5 PNMT	KCNA5 PNMT
Autosomal recessive spastic ataxia	0.009	3	Disease Of Visual System, Psychiatric Disorder, Nervous System Disease, Genetic, Familial Or Congenital Disease	HTR2C ADORA2A KDM1A	HTR2C ADORA2A KDM1A
Bilateral perisylvian polymicrogyria	0.009	3	Psychiatric Disorder, Nervous System Disease, Genetic, Familial Or Congenital Disease	HTR2C KDM1A ADRA2A	HTR2C KDM1A ADRA2A
Huntington disease-like 2	0.009	2	Psychiatric Disorder, Nervous System Disease, Genetic, Familial Or Congenital Disease	DRD2 SLC18A2	DRD2 SLC18A2
Xeroderma pigmentosum	0.01	4	Disease Of Visual System, Integumentary System Disease, Psychiatric Disorder, Nervous System Disease, Nutritional Or Metabolic Disease, Genetic, Familial Or Congenital Disease	PNP ODC1 CXCL8 CYP2A6	PNP ODC1 CXCL8 CYP2A6
Joubert syndrome	0.01	4	Disease Of Visual System, Psychiatric Disorder, Nervous System Disease, Genetic, Familial Or Congenital Disease	ILK NOS1 DRD2 SLC6A3	ILK NOS1 DRD2 SLC6A3
Mehmo syndrome	0.01	3	Endocrine System Disease, Psychiatric Disorder, Nervous System Disease, Nutritional Or Metabolic Disease, Genetic, Familial Or Congenital Disease	ADRA2A CES1 ADORA2A	ADRA2A CES1 ADORA2A
Cohen syndrome	0.01	3	Hematologic Disease, Disease Of Visual System, Immune System Disease, Endocrine System Disease, Musculoskeletal Or Connective Tissue Disease, Psychiatric Disorder, Nervous System Disease, Nutritional Or Metabolic Disease, Genetic, Familial Or Congenital Disease	CDC7 CHRNA7 KISS1R	CDC7 CHRNA7 KISS1R
Hartsfield-bixler-demyer syndrome	0.01	2	Musculoskeletal Or Connective Tissue Disease, Psychiatric Disorder, Nervous System Disease, Genetic, Familial Or Congenital Disease	SLC6A3 PNMT	SLC6A3 PNMT
Schinzel-giedion syndrome	0.01	2	Urinary System Disease, Integumentary System Disease, Psychiatric Disorder, Nervous System Disease, Genetic, Familial Or Congenital Disease	CXCL8 NOS2	CXCL8 NOS2
Progressive epilepsy - intellectual disability, finnish type	0.01	2	Disease Of Visual System, Endocrine System Disease, Musculoskeletal Or Connective Tissue Disease, Psychiatric Disorder, Nervous System Disease, Nutritional Or Metabolic Disease, Genetic, Familial Or Congenital Disease	HTR2C KDM1A	HTR2C KDM1A
Hepatic fibrosis - renal cysts - intellectual disability	0.01	2	Urinary System Disease, Endocrine System Disease, Psychiatric Disorder, Gastrointestinal Disease, Nervous System Disease, Genetic, Familial Or Congenital Disease	PLAU NOS2	PLAU NOS2
Basal ganglia calcification, idiopathic, 8, autosomal recessive	0.01	2	Psychiatric Disorder, Nervous System Disease, Nutritional Or Metabolic Disease, Genetic, Familial Or Congenital Disease	DRD2 SLC18A2	DRD2 SLC18A2
Spinocerebellar ataxia type 2	0.01	2	Disease Of Visual System, Musculoskeletal Or Connective Tissue Disease, Psychiatric Disorder, Nervous System Disease, Genetic, Familial Or Congenital Disease	DRD2 SLC18A2	DRD2 SLC18A2
Autosomal dominant cerebellar ataxia type 3	0.01	2	Disease Of Visual System, Psychiatric Disorder, Nervous System Disease, Genetic, Familial Or Congenital Disease	HTR3A DRD2	HTR3A DRD2
Oculocerebrorenal syndrome	0.01	2	Urinary System Disease, Disease Of Visual System, Psychiatric Disorder, Nervous System Disease, Nutritional Or Metabolic Disease, Genetic, Familial Or Congenital Disease	NOS1 SLC22A6	NOS1 SLC22A6
Joubert syndrome with hepatic defect	0.01	2	Disease Of Visual System, Endocrine System Disease, Psychiatric Disorder, Gastrointestinal Disease, Nervous System Disease, Genetic, Familial Or Congenital Disease	PLAU NOS2	PLAU NOS2
Cednik syndrome	0.01	2	Integumentary System Disease, Psychiatric Disorder, Nervous System Disease, Genetic, Familial Or Congenital Disease	EBP CES2	EBP CES2
Fine-lubinsky syndrome	0.01	1	Disease Of Visual System, Psychiatric Disorder, Nervous System Disease, Genetic, Familial Or Congenital Disease	KISS1R	KISS1R
X-linked intellectual disability, snyder type	0.01	1	Psychiatric Disorder, Nervous System Disease, Genetic, Familial Or Congenital Disease	ODC1	ODC1
Spondylocostal dysostosis - anal and genitourinary malformations	0.01	1	Urinary System Disease, Reproductive System Or Breast Disease, Musculoskeletal Or Connective Tissue Disease, Psychiatric Disorder, Nervous System Disease, Genetic, Familial Or Congenital Disease	KISS1R	KISS1R
Juvenile neuronal ceroid lipofuscinosis	0.02	4	Disease Of Visual System, Musculoskeletal Or Connective Tissue Disease, Psychiatric Disorder, Nervous System Disease, Nutritional Or Metabolic Disease, Genetic, Familial Or Congenital Disease	HTR2C ADRA2B KDM1A DRD2	HTR2C ADRA2B KDM1A DRD2
Bardet-biedl syndrome 10	0.02	4	Urinary System Disease, Reproductive System Or Breast Disease, Disease Of Visual System, Endocrine System Disease, Musculoskeletal Or Connective Tissue Disease, Psychiatric Disorder, Gastrointestinal Disease, Nervous System Disease, Nutritional Or Metabolic Disease, Genetic, Familial Or Congenital Disease	CES1 NOS2 KISS1R OPRM1	CES1 NOS2 KISS1R OPRM1
Smith-magenis syndrome	0.02	4	Endocrine System Disease, Musculoskeletal Or Connective Tissue Disease, Psychiatric Disorder, Nervous System Disease, Nutritional Or Metabolic Disease, Genetic, Familial Or Congenital Disease	NOS2 NOS1 CES1 GRIN2B	NOS2 NOS1 CES1 GRIN2B
Bilateral polymicrogyria	0.02	3	Psychiatric Disorder, Nervous System Disease, Genetic, Familial Or Congenital Disease	HTR2C KDM1A ADRA2A	HTR2C KDM1A ADRA2A
Microcephalic primordial dwarfism, toriello type	0.02	3	Musculoskeletal Or Connective Tissue Disease, Psychiatric Disorder, Nervous System Disease, Genetic, Familial Or Congenital Disease	CDC7 CHRNA7 KISS1R	CDC7 CHRNA7 KISS1R
Macrothrombocytopenia-lymphedema-developmental delay-facial dysmorphism-camptodactyly syndrome	0.02	3	Hematologic Disease, Disease Of Visual System, Integumentary System Disease, Immune System Disease, Psychiatric Disorder, Nervous System Disease, Cardiovascular Disease, Genetic, Familial Or Congenital Disease	ILK KDM1A CYP3A4	ILK KDM1A CYP3A4
Bullous dystrophy, macular type	0.02	3	Integumentary System Disease, Psychiatric Disorder, Nervous System Disease, Genetic, Familial Or Congenital Disease	ADRA2B CNR2 EBP	ADRA2B CNR2 EBP
Mednik syndrome	0.02	2	Integumentary System Disease, Psychiatric Disorder, Nervous System Disease, Nutritional Or Metabolic Disease, Genetic, Familial Or Congenital Disease	PLAU NOS2	PLAU NOS2
Male hypergonadotropic hypogonadism - intellectual disability - skeletal anomalies	0.02	2	Urinary System Disease, Reproductive System Or Breast Disease, Endocrine System Disease, Psychiatric Disorder, Nervous System Disease, Genetic, Familial Or Congenital Disease	ADRA1B HTR2C	ADRA1B HTR2C
Cln8 disease	0.02	2	Disease Of Visual System, Musculoskeletal Or Connective Tissue Disease, Psychiatric Disorder, Nervous System Disease, Nutritional Or Metabolic Disease, Genetic, Familial Or Congenital Disease	HTR2C KDM1A	HTR2C KDM1A
Autosomal recessive cerebellar ataxia-epilepsy-intellectual disability syndrome due to tud deficiency	0.02	2	Disease Of Visual System, Psychiatric Disorder, Nervous System Disease, Genetic, Familial Or Congenital Disease	PNMT SLC6A3	PNMT SLC6A3
Amish infantile epilepsy syndrome	0.02	2	Integumentary System Disease, Endocrine System Disease, Psychiatric Disorder, Nervous System Disease, Nutritional Or Metabolic Disease, Genetic, Familial Or Congenital Disease	HTR2C KDM1A	HTR2C KDM1A
St3gal5-cdg	0.02	2	Integumentary System Disease, Endocrine System Disease, Psychiatric Disorder, Nervous System Disease, Nutritional Or Metabolic Disease, Genetic, Familial Or Congenital Disease	HTR2C KDM1A	HTR2C KDM1A
Gm3 synthase deficiency	0.02	2	Integumentary System Disease, Endocrine System Disease, Psychiatric Disorder, Nervous System Disease, Nutritional Or Metabolic Disease, Genetic, Familial Or Congenital Disease	HTR2C KDM1A	HTR2C KDM1A
Bresek syndrome	0.02	2	Disease Of Visual System, Integumentary System Disease, Endocrine System Disease, Psychiatric Disorder, Nervous System Disease, Nutritional Or Metabolic Disease, Genetic, Familial Or Congenital Disease	ILK TRPV3	ILK TRPV3
Williams syndrome	0.02	2	Urinary System Disease, Disease Of Visual System, Psychiatric Disorder, Nervous System Disease, Cardiovascular Disease, Respiratory Or Thoracic Disease, Genetic, Familial Or Congenital Disease	CACNA2D1 CES1	CACNA2D1 CES1
Hennekam-beemer syndrome	0.02	2	Psychiatric Disorder, Nervous System Disease, Genetic, Familial Or Congenital Disease	HRH4 TACR1	HRH4 TACR1
Sexual and gender identity disorders	0.02	2	Psychiatric Disorder	MAOA HTR2A	MAOA HTR2A
Alopecia - epilepsy - pyorrhea - intellectual disability	0.02	2	Integumentary System Disease, Psychiatric Disorder, Nervous System Disease, Genetic, Familial Or Congenital Disease	CNR2 EBP	CNR2 EBP
3-phosphoserine phosphatase deficiency	0.02	2	Psychiatric Disorder, Nervous System Disease, Nutritional Or Metabolic Disease, Genetic, Familial Or Congenital Disease	HTR2C SLC6A3	HTR2C SLC6A3
3-methylglutaconic aciduria type 9	0.02	1	Psychiatric Disorder, Nervous System Disease, Nutritional Or Metabolic Disease, Genetic, Familial Or Congenital Disease	HTR3A	HTR3A
Intellectual disability-developmental delay-contractures syndrome	0.02	1	Musculoskeletal Or Connective Tissue Disease, Psychiatric Disorder, Nervous System Disease, Genetic, Familial Or Congenital Disease	HTR3A	HTR3A
Spinocerebellar ataxia type 42	0.02	1	Disease Of Visual System, Psychiatric Disorder, Nervous System Disease, Genetic, Familial Or Congenital Disease	HTR3A	HTR3A
Spinocerebellar ataxia 48	0.02	1	Disease Of Visual System, Psychiatric Disorder, Nervous System Disease, Genetic, Familial Or Congenital Disease	HTR3A	HTR3A
Craniofrontonasal dysplasia	0.02	1	Musculoskeletal Or Connective Tissue Disease, Psychiatric Disorder, Nervous System Disease, Genetic, Familial Or Congenital Disease	KISS1R	KISS1R
Microcephalic primordial dwarfism	0.03	5	Musculoskeletal Or Connective Tissue Disease, Psychiatric Disorder, Nervous System Disease, Genetic, Familial Or Congenital Disease	KISS1R ILK CDC7 CHRNA7 HTR3A	KISS1R ILK CDC7 CHRNA7 HTR3A
Bardet-biedl syndrome 7	0.03	3	Urinary System Disease, Reproductive System Or Breast Disease, Disease Of Visual System, Endocrine System Disease, Musculoskeletal Or Connective Tissue Disease, Psychiatric Disorder, Gastrointestinal Disease, Nervous System Disease, Nutritional Or Metabolic Disease, Genetic, Familial Or Congenital Disease	CES1 OPRM1 DRD2	CES1 OPRM1 DRD2
Bardet-biedl syndrome 9	0.03	3	Urinary System Disease, Reproductive System Or Breast Disease, Disease Of Visual System, Endocrine System Disease, Musculoskeletal Or Connective Tissue Disease, Psychiatric Disorder, Gastrointestinal Disease, Nervous System Disease, Nutritional Or Metabolic Disease, Genetic, Familial Or Congenital Disease	CES1 DRD2 OPRM1	CES1 DRD2 OPRM1
Motor developmental delay due to 14q32.2 paternally expressed gene defect	0.03	3	Endocrine System Disease, Psychiatric Disorder, Nervous System Disease, Nutritional Or Metabolic Disease, Genetic, Familial Or Congenital Disease	NOS1 CES1 NOS2	NOS1 CES1 NOS2
Polymicrogyria	0.03	3	Psychiatric Disorder, Nervous System Disease, Genetic, Familial Or Congenital Disease	HTR2C KDM1A ADRA2A	HTR2C KDM1A ADRA2A
Congenital muscular dystrophy with cerebellar involvement	0.03	3	Musculoskeletal Or Connective Tissue Disease, Psychiatric Disorder, Nervous System Disease, Nutritional Or Metabolic Disease, Genetic, Familial Or Congenital Disease	SLC18A2 NOS1 PLAU	SLC18A2 NOS1 PLAU
Congenital muscular dystrophy with intellectual disability	0.03	3	Musculoskeletal Or Connective Tissue Disease, Psychiatric Disorder, Nervous System Disease, Nutritional Or Metabolic Disease, Genetic, Familial Or Congenital Disease	SLC18A2 PLAU NOS1	SLC18A2 PLAU NOS1
Juvenile huntington disease	0.03	2	Disease Of Visual System, Psychiatric Disorder, Nervous System Disease, Genetic, Familial Or Congenital Disease	DRD2 SLC18A2	DRD2 SLC18A2
X-linked cerebral adrenoleukodystrophy	0.03	2	Urinary System Disease, Reproductive System Or Breast Disease, Endocrine System Disease, Psychiatric Disorder, Nervous System Disease, Nutritional Or Metabolic Disease, Genetic, Familial Or Congenital Disease	HTR3A S1PR3	HTR3A S1PR3
Marden-walker syndrome	0.03	2	Musculoskeletal Or Connective Tissue Disease, Psychiatric Disorder, Nervous System Disease, Genetic, Familial Or Congenital Disease	NOS1 ILK	NOS1 ILK
Mitochondrial complex 1 deficiency, nuclear type 34	0.03	1	Musculoskeletal Or Connective Tissue Disease, Psychiatric Disorder, Nervous System Disease, Nutritional Or Metabolic Disease, Genetic, Familial Or Congenital Disease	NOS1	NOS1
Spinocerebellar ataxia type 42	0.03	1	Disease Of Visual System, Psychiatric Disorder, Nervous System Disease, Genetic, Familial Or Congenital Disease	HTR3A	HTR3A
Sandhoff disease, juvenile form	0.03	1	Disease Of Visual System, Psychiatric Disorder, Nervous System Disease, Nutritional Or Metabolic Disease, Genetic, Familial Or Congenital Disease	HTR3A	HTR3A
Sandhoff disease, infantile form	0.03	1	Disease Of Visual System, Psychiatric Disorder, Nervous System Disease, Nutritional Or Metabolic Disease, Genetic, Familial Or Congenital Disease	HTR3A	HTR3A
Sandhoff disease, adult form	0.03	1	Disease Of Visual System, Psychiatric Disorder, Nervous System Disease, Nutritional Or Metabolic Disease, Genetic, Familial Or Congenital Disease	HTR3A	HTR3A
Skeletal dysplasia - epilepsy - short stature	0.03	1	Musculoskeletal Or Connective Tissue Disease, Psychiatric Disorder, Nervous System Disease, Genetic, Familial Or Congenital Disease	RPS6KA3	RPS6KA3
Hypomyelinating leukodystrophy 12	0.03	1	Psychiatric Disorder, Nervous System Disease, Genetic, Familial Or Congenital Disease	HTR3A	HTR3A
22q11.2 deletion syndrome	0.04	3	Urinary System Disease, Immune System Disease, Endocrine System Disease, Musculoskeletal Or Connective Tissue Disease, Psychiatric Disorder, Nervous System Disease, Cardiovascular Disease, Respiratory Or Thoracic Disease, Nutritional Or Metabolic Disease, Genetic, Familial Or Congenital Disease	KIF11 ADORA2A CHRNA7	KIF11 ADORA2A CHRNA7
Cog1-cdg	0.04	3	Musculoskeletal Or Connective Tissue Disease, Psychiatric Disorder, Nervous System Disease, Cardiovascular Disease, Respiratory Or Thoracic Disease, Nutritional Or Metabolic Disease, Genetic, Familial Or Congenital Disease	HTR3A CYP3A4 KISS1R	HTR3A CYP3A4 KISS1R
Bardet-biedl syndrome 5	0.04	3	Urinary System Disease, Reproductive System Or Breast Disease, Disease Of Visual System, Endocrine System Disease, Musculoskeletal Or Connective Tissue Disease, Psychiatric Disorder, Gastrointestinal Disease, Nervous System Disease, Nutritional Or Metabolic Disease, Genetic, Familial Or Congenital Disease	KISS1R CES1 OPRM1	KISS1R CES1 OPRM1
Sanjad-sakati syndrome	0.04	2	Endocrine System Disease, Psychiatric Disorder, Nervous System Disease, Nutritional Or Metabolic Disease, Genetic, Familial Or Congenital Disease	DPP4 CXCL8	DPP4 CXCL8
Ane syndrome	0.04	2	Urinary System Disease, Reproductive System Or Breast Disease, Integumentary System Disease, Endocrine System Disease, Psychiatric Disorder, Nervous System Disease, Genetic, Familial Or Congenital Disease	EBP CNR2	EBP CNR2
Moynahan syndrome	0.04	2	Integumentary System Disease, Psychiatric Disorder, Nervous System Disease, Genetic, Familial Or Congenital Disease	CNR2 EBP	CNR2 EBP
Hypertrichotic osteochondrodysplasia, cantu type	0.04	2	Musculoskeletal Or Connective Tissue Disease, Psychiatric Disorder, Nervous System Disease, Genetic, Familial Or Congenital Disease	NOS1 PLAU	NOS1 PLAU
Autosomal dominant cerebellar ataxia type 4	0.04	2	Disease Of Visual System, Psychiatric Disorder, Nervous System Disease, Genetic, Familial Or Congenital Disease	HTR3A KCNA5	HTR3A KCNA5
Muscle-eye-brain disease	0.04	2	Disease Of Visual System, Musculoskeletal Or Connective Tissue Disease, Psychiatric Disorder, Nervous System Disease, Nutritional Or Metabolic Disease, Genetic, Familial Or Congenital Disease	PLAU NOS1	PLAU NOS1
Leukocyte adhesion deficiency type ii	0.04	2	Immune System Disease, Psychiatric Disorder, Nervous System Disease, Nutritional Or Metabolic Disease, Genetic, Familial Or Congenital Disease	PLAU NOS1	PLAU NOS1
Lissencephaly type 3 - metacarpal bone dysplasia	0.04	1	Psychiatric Disorder, Nervous System Disease, Genetic, Familial Or Congenital Disease	DRD2	DRD2
Spinocerebellar ataxia type 21	0.04	1	Disease Of Visual System, Psychiatric Disorder, Nervous System Disease, Genetic, Familial Or Congenital Disease	DRD2	DRD2
Oculodentodigital dysplasia	0.04	1	Disease Of Visual System, Integumentary System Disease, Musculoskeletal Or Connective Tissue Disease, Psychiatric Disorder, Nervous System Disease, Genetic, Familial Or Congenital Disease	HTR3A	HTR3A
Multi-infarct dementia	0.04	1	Psychiatric Disorder, Nervous System Disease, Cardiovascular Disease	NOS2	NOS2
Mend syndrome	0.05	1	Endocrine System Disease, Psychiatric Disorder, Nervous System Disease, Nutritional Or Metabolic Disease, Genetic, Familial Or Congenital Disease	EBP	EBP
Microcephalic primordial dwarfism, dauber type	0.05	1	Musculoskeletal Or Connective Tissue Disease, Psychiatric Disorder, Nervous System Disease, Genetic, Familial Or Congenital Disease	KISS1R	KISS1R
Corticobasal syndrome	0.05	1	Psychiatric Disorder, Nervous System Disease, Genetic, Familial Or Congenital Disease	DRD2	DRD2
Methamphetamine-induced psychosis	0.05	1	Psychiatric Disorder, Nervous System Disease	DRD2	DRD2
Neuroferritinopathy	0.05	1	Psychiatric Disorder, Nervous System Disease, Nutritional Or Metabolic Disease, Genetic, Familial Or Congenital Disease	SLC6A3	SLC6A3
Christianson syndrome	0.05	1	Psychiatric Disorder, Nervous System Disease, Genetic, Familial Or Congenital Disease	HTR3A	HTR3A
Huntington disease-like 3	0.05	1	Psychiatric Disorder, Nervous System Disease, Genetic, Familial Or Congenital Disease	HTR3A	HTR3A
