# Supplementary material for: Unraveling the Catha edulis Extract Effects on the Cellular and Molecular Signaling in SKOV3 Cells
Source: Frontiers journal article supplement (doi:10.3389/fphar.2021.666885), 2021-05-10
Supplement: Table_1.pdf [file Table_1.pdf]

**Table S1:** The putative molecular targets of the khat constituents cathine and cathinone, obtained based on both canonical and isomeric SMILES from the PubChem Database. The target list also shows the associated target classes identified by Swiss Target Prediction.

| SwissTargetPrediction |               |                                                      |                  |                                                      |
|-----------------------|---------------|------------------------------------------------------|------------------|------------------------------------------------------|
| Cathine               |               |                                                      | Cathinone        |                                                      |
| No.                   | Uniprot ID    | Target Class                                         | Uniprot ID       | Target Class                                         |
| 1                     | P08913        | Family A G protein-coupled receptor                  | P25103           | Family A G protein-coupled receptor                  |
| 2                     | P18089        | Family A G protein-coupled receptor                  | P31645           | Electrochemical transporter                          |
| 3                     | P35348        | Family A G protein-coupled receptor                  | Q01959           | Electrochemical transporter                          |
| 4                     | P31645        | Electrochemical transporter                          | P23975           | Electrochemical transporter                          |
| 5                     | Q96RJ0        | Family A G protein-coupled receptor                  | Q96RJ0           | Family A G protein-coupled receptor                  |
| 6                     | Q01959        | Electrochemical transporter                          | P27338           | Oxidoreductase                                       |
| 7                     | P23975        | Electrochemical transporter                          | P23141           | Enzyme                                               |
| 8                     | P28223        | Family A G protein-coupled receptor                  | O00748           | Enzyme                                               |
| 9                     | P15144        | Protease                                             | P28223           | Family A G protein-coupled receptor                  |
| 10                    | P46098        | Ligand-gated ion channel                             | Q05940           | Electrochemical transporter                          |
| 11                    | Q05940        | Electrochemical transporter                          | P54289           | Calcium channel auxiliary subunit alpha2delta family |
| 12                    | P54289        | Calcium channel auxiliary subunit alpha2delta family | Q03405           | Membrane receptor                                    |
| 13                    | O60341        | Eraser                                               | Q6V1X1           | Protease                                             |
| 14                    | P28221        | Family A G protein-coupled receptor                  | P32297<br>P30926 | Ligand-gated ion channel                             |
| 15                    | P14416        | Family A G protein-coupled receptor                  | P43681           | Ligand-gated ion channel                             |
| 16                    | P21397        | Oxidoreductase                                       | P29475           | Enzyme                                               |
| 17                    | P27338        | Oxidoreductase                                       | P35228           | Enzyme                                               |
| 18                    | P07550        | Family A G protein-coupled receptor                  | P29474           | Enzyme                                               |
| 19                    | Q9H3N8        | Family A G protein-coupled receptor                  | Q99720           | Membrane receptor                                    |
| 20                    | P25103        | Family A G protein-coupled receptor                  | P11086           | Enzyme                                               |
| 21                    | Q969F8        | Family A G protein-coupled receptor                  | Q92831           | Writer                                               |
| 22                    | P11509        | Cytochrome P450                                      | P08253           | Protease                                             |
| 23                    | P11086        | Enzyme                                               | Q969F8           | Family A G protein-coupled receptor                  |
| 24                    | Q16853        | Enzyme                                               | P21397           | Oxidoreductase                                       |
| 25                    | P08588        | Family A G protein-coupled receptor                  | P25021           | Family A G protein-coupled receptor                  |
| 26                    | P35228        | Enzyme                                               | Q9H3N8           | Family A G protein-coupled receptor                  |
| 27                    | P30926 P43681 | Ligand-gated ion channel                             | Q9Y2I1           | Other cytosolic protein                              |
| 28                    | P30926 Q15822 | Ligand-gated ion channel                             | P32297<br>P17787 | Ligand-gated ion channel                             |
| 29                    | P00390        | Oxidoreductase                                       | P33261           | Cytochrome P450                                      |
| 30                    | P18825        | Family A G protein-coupled receptor                  | P11509           | Cytochrome P450                                      |
| 31                    | P28335        | Family A G protein-coupled receptor                  | P30542           | Family A G protein-coupled receptor                  |
| 32                    | Q9H228        | Family A G protein-coupled receptor                  | P36544           | Ligand-gated ion channel                             |
| 33                    | Q95977        | Family A G protein-coupled receptor                  | P43166           | Lyase                                                |
| 34                    | Q99500        | Family A G protein-coupled receptor                  | P00915           | Lyase                                                |
| 35                    | P21453        | Family A G protein-coupled receptor                  | P23280           | Lyase                                                |
| 36                    | P16662        | Enzyme                                               | O43570           | Lyase                                                |
| 37                    | P29475        | Enzyme                                               | Q9ULX7           | Lyase                                                |
| 38                    | Q9GZQ4        | Family A G protein-coupled receptor                  | Q16790           | Lyase                                                |
| 39                    | Q9UHL4        | Protease                                             | Q9Y2D0           | Lyase                                                |
| 40                    | Q13126        | Enzyme                                               | P35218           | Lyase                                                |

|    |                         |                                     |        |                                     |
|----|-------------------------|-------------------------------------|--------|-------------------------------------|
| 41 | Q01650                  | Electrochemical transporter         | Q8N1Q1 | Lyase                               |
| 42 | P08908                  | Family A G protein-coupled receptor | P15144 | Protease                            |
| 43 | P23526                  | Enzyme                              | Q96LA8 | Writer                              |
| 44 | P43681                  | Ligand-gated ion channel            | Q13639 | Family A G protein-coupled receptor |
| 45 | P00491                  | Enzyme                              | P18825 | Family A G protein-coupled receptor |
| 46 | P35462                  | Family A G protein-coupled receptor | Q86X55 | Writer                              |
| 47 | P52732                  | Other cytosolic protein             | P08913 | Family A G protein-coupled receptor |
| 48 | Q16831                  | Enzyme                              | Q9UHL4 | Protease                            |
| 49 | O96020 P24941<br>P24864 | Other cytosolic protein             | P14416 | Family A G protein-coupled receptor |
| 50 | P50750 O60563           | Other cytosolic protein             | Q13464 | Kinase                              |
| 51 | P36639                  | Enzyme                              | Q01650 | Electrochemical transporter         |
| 52 | P00749                  | Protease                            | Q9Y5N1 | Family A G protein-coupled receptor |
| 53 | P27487                  | Protease                            | O75116 | Kinase                              |
| 54 | P35368                  | Family A G protein-coupled receptor | P00749 | Protease                            |
| 55 | P22460                  | Voltage-gated ion channel           | P28335 | Family A G protein-coupled receptor |
| 56 | P51812                  | Kinase                              | P35462 | Family A G protein-coupled receptor |
| 57 | P11940                  | Unclassified protein                | P48048 | Voltage-gated ion channel           |
| 58 | P36544                  | Ligand-gated ion channel            | P10827 | Nuclear receptor                    |
| 59 | P10635                  | Cytochrome P450                     | P10828 | Nuclear receptor                    |
| 60 | P11712                  | Cytochrome P450                     | P32297 | Ligand-gated ion channel            |
| 61 | P08684                  | Cytochrome P450                     | Q9UGN5 | Enzyme                              |
| 62 | P33261                  | Cytochrome P450                     | Q9UBN7 | Eraser                              |
| 63 | Q13224                  | Ligand-gated ion channel            | P19801 | Enzyme                              |
| 64 | Q05586<br>Q13224        | Ligand-gated ion channel            | Q86TI2 | Protease                            |
| 65 | Q15125                  | Enzyme                              | Q9BY41 | Eraser                              |
| 66 | Q9ULX7                  | Lyase                               | Q13547 | Eraser                              |
| 67 | P23141                  | Enzyme                              | Q96KB5 | Kinase                              |
| 68 | O00748                  | Enzyme                              | P11712 | Cytochrome P450                     |
| 69 | P24385 P11802           | Kinase                              | P08684 | Cytochrome P450                     |
| 70 | P06493 P14635           | Other cytosolic protein             | Q9UIF9 | Reader                              |
| 71 | P24864 P24941           | Kinase                              | P21964 | Transferase                         |
| 72 | O14757                  | Kinase                              | Q9P1W9 | Kinase                              |
| 73 | P35372                  | Family A G protein-coupled receptor | P07384 | Protease                            |
| 74 | P41143                  | Family A G protein-coupled receptor | Q6QHF9 | Enzyme                              |
| 75 | Q9UKL0<br>O60341        | Eraser                              | P23458 | Kinase                              |
| 76 | P24941 P78396<br>P20248 | Other cytosolic protein             | O60674 | Kinase                              |
| 77 | P10145                  | Secreted protein                    | Q05655 | Kinase                              |
| 78 | Q4U2R8                  | Electrochemical transporter         | Q02156 | Kinase                              |
| 79 | P11926                  | Lyase                               | Q15139 | Kinase                              |
| 80 | Q99720                  | Membrane receptor                   | P00491 | Enzyme                              |
| 81 | Q13639                  | Family A G protein-coupled receptor | Q12884 | Protease                            |
| 82 | P29274                  | Family A G protein-coupled receptor | P51817 | Kinase                              |
| 83 | P29275                  | Family A G protein-coupled receptor | Q86V86 | Kinase                              |
| 84 | P50579                  | Protease                            | Q92769 | Eraser                              |
| 85 | Q8NET8                  | Voltage-gated ion channel           | P04818 | Transferase                         |
| 86 | P37058                  | Enzyme                              | O60341 | Eraser                              |
| 87 | P50750                  | Kinase                              | Q9NR22 | Writer                              |
| 88 | P41145                  | Family A G protein-coupled receptor | P41595 | Family A G protein-coupled receptor |
| 89 | Q13418                  | Kinase                              | O00311 | Kinase                              |

|     |                         |                                     |                  |                                     |
|-----|-------------------------|-------------------------------------|------------------|-------------------------------------|
| 90  | O75899<br>Q9UBS5        | Family C G protein-coupled receptor | P31751           | Kinase                              |
| 91  | B2RXH2                  | Eraser                              | P28838           | Protease                            |
| 92  | P06241                  | Kinase                              | Q8IXJ6           | Eraser                              |
| 93  | P41146                  | Family A G protein-coupled receptor | Q96EB6           | Eraser                              |
| 94  | P06239                  | Kinase                              | Q96PY6           | Kinase                              |
| 95  | P14867 P47870<br>P18507 | Ligand-gated ion channel            | O75899<br>Q9UBS5 | Family C G protein-coupled receptor |
| 96  | P21554                  | Family A G protein-coupled receptor | P49841           | Kinase                              |
| 97  | P34972                  | Family A G protein-coupled receptor | P06241           | Kinase                              |
| 98  | P63316 P45379<br>P19429 | Unclassified protein                | P06239           | Kinase                              |
| 99  | O00311                  | Kinase                              | P46059           | Electrochemical transporter         |
| 100 | P41595                  | Family A G protein-coupled receptor | Q02750           | Kinase                              |
